25 **TEASER (130 characters)**

26 Mouse and rabbit NAbs elicited by gp41-stabilized trimers and nanoparticles neutralize autologous

27 HIV-1 by targeting different epitopes

28

29 **ABSTRACT (150 words)**

30 Antigen-specific B-cell sorting and next-generation sequencing (NGS) were combined to isolate

31 HIV-1 neutralizing antibodies (NAbs) from mice and rabbits immunized with BG505 trimers and

32 nanoparticles. Three mouse NAbs potently neutralize BG505.T332N and recognize a glycan

33 epitope centered at the C3/V4 region, as revealed by electron microscopy (EM), x-ray

34 crystallography, and epitope mapping. Three potent NAbs were sorted from rabbit B cells that

35 target glycan holes on the BG505 envelope glycoprotein (Env) and account for a significant

36 portion of autologous NAb response. We then determined a 3.4Å-resolution crystal structure for

37 the clade C transmitted/founder Du172.17 Env with a redesigned heptad repeat 1 (HR1) bend. This

38 clade C Env, as a soluble trimer and attached to a ferritin nanoparticle, along with a clade A Q482-

39 d12 Env trimer, elicited distinct NAb responses in rabbits. Our study demonstrates that

40 nanoparticles presenting gp41-stabilized trimers can induce potent NAb responses in mice and

41 rabbits with Env-dependent breadth.



## 42 INTRODUCTION

43 The envelope glycoprotein (Env) on HIV-1 virions mediates cell entry and is the target of broadly  
44 neutralizing antibodies (bNAbs) (1). Diverse bNAb families have been identified from HIV-1  
45 infected individuals. Structural characterization of these human bNAbs in complex with Env  
46 proteins has defined multiple sites of HIV-1 vulnerability such as the CD4 binding site (CD4bs),  
47 quaternary V1/V2 glycan site, N332-oligomannose patch, silent face, gp120-gp41 interface, fusion  
48 peptide (FP), and membrane-proximal external region (MPER) (2-4). These bNAbs often possess  
49 unusual sequence characteristics acquired during extensive virus-host coevolution. As a result, the  
50 targets of bNAbs differ substantially from the strain-specific epitopes recognized by autologous  
51 NAbs early in human infection (5-8). Information on both of these types of antibodies, and tracing  
52 them back to their unmutated common ancestors (UCAs) and early intermediates, are valuable  
53 tools in guiding rational design of vaccine immunogens (9-11).

54 Soluble native-like Env trimers have emerged as a promising platform for HIV-1 vaccine  
55 design (12, 13). As the leading design platform, SOSIP trimers have been created and characterized  
56 for diverse HIV-1 subtypes and strains (14-17), followed by native flexibly linked (NFL) (18) and  
57 uncleaved prefusion optimized (UFO) trimers (19). Env structures from x-ray crystallography and  
58 cryo-electron microscopy (cryo-EM) provided a rational basis for improving trimer design (20-  
59 23). While mutations aiming to increase Env stability and immunogenicity were extensively tested  
60 in the context of SOSIP and NFL trimers (24-36), the causes of Env metastability were probed on  
61 the basis of the UFO trimer (19, 37). To further enhance immune recognition, these three trimer  
62 designs have been displayed on nanoparticles (NPs) of diverse chemical nature such as protein,  
63 lipid, and iron oxide (30, 37-44). Various animal models such as mouse, rabbit, and nonhuman  
64 primate (NHP) have been used to assess immunogenicity of HIV-1 Env in soluble or particulate

65 forms. In wildtype mice, BG505 SOSIP.664 Env trimer failed to elicit a detectable tier 2 NAb  
66 response, but showed robust non-neutralizing binding titers towards a “neoepitope” at its base (45).  
67 However, a tier 2 NAb response was observed for a 60-mer presenting 20 gp41-stabilized BG505  
68 trimers (37). Using various vaccine design strategies, mouse antibodies were elicited to the N332-  
69 glycan supersite (non-neutralizing) (46) and fusion peptide (weak but broad) (47). A germline-  
70 targeting strategy proved to be successful in engineered mice with knocked-in genes corresponding  
71 to bNAbs and precursors (48-50). In contrast to the challenges of NAb elicitation in mice, potent  
72 and sometimes broad tier 2 NAb responses have been reported in *in vivo* studies where rabbits  
73 were immunized with diverse trimers and trimer-presenting NPs (17, 27-30, 35, 51-53). However,  
74 epitope mapping identified that specific glycan holes on the HIV-1 Env dominated the autologous  
75 NAb response in rabbits (54-61). HIV-1 immunogens in trimeric and particulate forms have also  
76 been assessed in NHPs, where they were found to elicit consistent autologous but sparse cross-  
77 subtype NAb responses (17, 42, 51, 52, 59, 62-65). The C3/465 epitope was identified as a major  
78 target of NAb responses in macaques induced by the BG505 SOSIP.664 trimer (59, 66). Overall,  
79 recognition of Env by mouse and NHP NAbs is substantially less understood compared to rabbit  
80 NAbs. In addition, the effect of both HR1 and gp41 stabilization, which is the core of the UFO  
81 trimer design (19, 37), on NAb elicitation and epitope targeting in wildtype animal models has not  
82 been as well characterized compared to SOSIP and NFL trimers.

83       Previously, we designed gp41-stabilized trimers and NPs and assessed their NAb responses  
84 in mice and rabbits (37). In this particular study, we set out to characterize mouse and rabbit NAbs  
85 induced by these immunogens in greater detail. First, we identified tier 2 mouse NAbs elicited by  
86 an HR1-redesigned BG505 trimer presented on a 60-meric I3-01 NP. A potent NAb, M4H2K1,  
87 was identified by pairing representative heavy and light chains obtained from next-generation

88 sequencing (NGS) analysis of Env-specific splenic B cells, with two somatically related NAb  
89 isolated by single B-cell sorting and antibody cloning. Negative-stain EM (nsEM) analysis showed  
90 that M4H2K1 recognized the C3/V4 region of the native-like BG505 Env. The crystal structure of  
91 M4H2K1 bound to a BG505 gp120 core at 4.3Å resolution revealed key antibody interactions with  
92 the C2/C3/V4/V5 epitope, which were confirmed in TZM-bl neutralization assays against a panel  
93 of BG505.T332N mutant viruses. A less potent NAb from a different mouse (M1), M1H2K1, was  
94 also identified, which likely targets the same epitope. We then performed single B-cell sorting and  
95 NGS for one rabbit immunized with an HR1-redesigned BG505 trimer and another with a ferritin  
96 NP presenting this trimer (37). Three representative rabbit NAb were tested against a panel of  
97 glycan hole variants of BG505.T332N and found to target the glycan holes at 241/289 and 465.  
98 Further analysis of plasma neutralization confirmed that these glycan holes accounted for a large  
99 portion of the polyclonal antibody response, suggesting that ferritin display cannot broaden the  
100 rabbit NAb response induced by soluble BG505 Env. Lastly, we determined a 3.4 Å-resolution  
101 crystal structure for an HR1-redesigned trimer derived from the Env of a clade C transmitted  
102 founder (T/F) virus, Du172.17. In rabbits, the Du172.17 trimer and ferritin NP induced modest  
103 cross-clade NAb responses, whereas the UFO-BG trimer derived from a clade A T/F Q842-d12  
104 Env exhibited a narrow NAb response. Our study thus confirmed that self-assembling protein NPs  
105 presenting gp41-stabilized trimers are capable of inducing potent tier-2 NAb in mice and rabbits,  
106 in addition to structural and functional evaluation of the newly designed T/F Env trimers.

## 107 **RESULTS**

### 108 **Mouse NAb isolated by Env-specific B cell sorting and antibody NGS**

109 Previously, we reported tier 2 NAb response in mouse immunization with NPs presenting an HR1-  
110 redesigned BG505 trimer (37). In separate studies, we used a BG505 trimer probe bearing this

111 redesigned HR1 to identify early intermediates of the PGT121 lineage from a phage antibody  
112 library (67) and two N332-directed bNAbs from peripheral blood mononuclear cells (PBMCs) of  
113 an HIV-1-infected Chinese donor (68). Here, we used this BG505 trimer probe in two strategies  
114 to assist in NAb identification from mouse splenic B cells (**Fig. 1**). One strategy focused on NGS  
115 analysis of bulk-sorted B cells and the other involved on single-cell sorting and antibody cloning.  
116 The I3-01 NP group (37), in which two mice (M1 and M4) developed a robust tier 2 NAb response,  
117 was selected to characterize the mouse NAbs at the monoclonal level.

118         We first isolated mouse NAbs through NGS analysis of bulk-sorted Env-specific B cells  
119 and random pairing of consensus heavy and light chains (**Fig. 1**). This approach was devised based  
120 on the hypothesis that the small number of vaccine-induced B cell lineages will enable frequency-  
121 based identification of functional antibodies. In bulk sorting, 87~1064 BG505 Env-specific B cells  
122 were obtained from the four mice studied (**fig. S1A**). Unbiased mouse antibody heavy and  $\kappa$ -light  
123 chain (HC and KC) libraries were constructed and sequenced on an Ion S5 platform, which yielded  
124 up to 1.22 million raw reads (**fig. S1B**). The antibody NGS data were processed using a mouse  
125 antibodyomics pipeline (69) to remove low-quality and incomplete reads (**fig. S1B**). Quantitative  
126 profiles of Env-specific B cell populations were determined for each mouse in the I3-01 NP group,  
127 revealing distinct patterns (**Fig. 1B**). Diverse antibody variable ( $V_H$  and  $V_K$ ) genes were activated  
128 in response to Env immunization with some overlap observed for the two mice (M1 and M4) that  
129 developed a tier 2 autologous NAb response (37). While IGHV6 and IGHV1S were used by Env-  
130 specific antibodies from both M1 and M4, 77% of M1 HCs were derived from IGHV11 and 70%  
131 of M4 HCs from IGHV1S. A similar pattern was observed for the  $V_K$  distribution, with overlap  
132 on the IGKV3, IGKV4, and IGKV6 genes. In terms of somatic hypermutation (SHM), a consistent  
133  $V_H$  distribution was observed for four mice that peaked at the 7-9% nucleotide (nt) difference from

134 assigned germline genes. In contrast, four mice exhibited significant differences in their V<sub>K</sub> SHM  
135 distributions, with M2 and M3 showing the largest difference in average SHM of 10.0% and 1.6%,  
136 respectively. In terms of complementarity-determining region 3 (CDR3) length, M2 and M3 also  
137 appeared to show a notable difference from M1 and M4 by using predominantly 5-aa KCDR3 and  
138 HCDR3 loops, respectively. Nonetheless, a CDR3-based clustering algorithm (67) was used to  
139 calculate consensus HCs and KCs from the M1 and M4 NGS data (**Fig. 1C** and **fig. S1C**), because  
140 IgG purified from these two mice neutralized BG505.T332N (37). Interestingly, M1H2 and M4H2,  
141 both from the second largest sequence family, were of the IGHV6-6\*02 origin, whereas M1K1  
142 and M4K1 shared the IGKV3-2\*01 germline gene (**Fig. 1C**). These consensus HCs and KCs were  
143 synthesized to reconstitute mouse antibodies. To further enrich the antibody pool, we performed  
144 single B-cell sorting on M4 splenic B cells using the same BG505 probe. The natively paired HCs  
145 and KCs of two monoclonal antibodies (mAbs), M4-Ab3 and M4-Ab9, were derived from IGHV6-  
146 6\*02 and IGKV3-2\*01, suggesting that they might be somatically related to M4H2 and M4K1,  
147 respectively (**Fig. 1C** and **fig. S1D**). Two-dimensional (2D) divergence/identity analysis (68, 70)  
148 was performed to compare the prevalence of these mouse mAbs in the NGS-derived antibody  
149 repertoire (**Fig. 1D**). Using an HCDR3 identity cutoff of 95%, 13531, 11, and 401 sequences were  
150 related to M4H2, M4-Ab3 HC, and M4-Ab9 HC, respectively. Based on the same KCDR3 identity  
151 cutoff, 49231, 2012, and 44355 sequences were somatically related to M4K1, M4-Ab3 KC, and  
152 M4-Ab9 KC, respectively. Of note, a significant portion of somatically related HCs and KCs were  
153 identical to M4H2 (33.9%) and M4K1 (10.3%), respectively, suggesting that these two consensus  
154 sequences represent native antibody chains used by Env-specific B cells from M4. Taken together,  
155 a panel of mAbs were identified from two NAb-producing mice in our previous study (37).

156 We characterized the binding of these mouse mAbs to a panel of Env antigens by enzyme-  
157 linked immunosorbent assay (ELISA) (**Fig. 1E** and **fig. S2A**). When the BG505 UFO.664 trimer  
158 was used as a coating antigen, three mAbs from M4, including NGS-derived M4H2K1 and single-  
159 cell sorting-derived M4-Ab3 and M4-Ab9, and two NGS-derived mAbs from M1, M1H2K1 and  
160 M1H3K3, bound to this native-like Env trimer with up to 16.6-fold difference in the half maximal  
161 effective concentration ( $EC_{50}$ ) value (**Fig. 1E**, left). Among the three M4 mAbs, the two single-  
162 cell sorting-derived mAbs bound to BG505 UFO.664 Env with 2.9 and 5.5-fold lower  $EC_{50}$  values  
163 than M4H2K1. Other NGS-derived HC-KC pairs showed low or no trimer binding (**fig. S2A**, top).  
164 We examined the epitope specificity of trimer-binding mAbs by testing four NP probes derived  
165 from ferritin (FR), including BG505 gp120-FR (41), an N332-FR termed 1GUT\_A\_ES-5GS-FR  
166 (69), a BG505 V1V2-FR (41), and a newly developed FP-5GS-FR. In ELISA, all five mAbs bound  
167 to BG505 gp120-FR with comparable  $EC_{50}$  values (**Fig. 1E**, right), but failed to show any  
168 detectable binding to the N332 supersite, V1V2 apex, and FP epitope in the context of the probes  
169 (**fig. S2A**, bottom), suggesting that they may recognize a different epitope in gp120.

170 We characterized the neutralizing activity of these mouse mAbs in TZM-bl assays (**Fig.**  
171 **1F**; **fig. S2B** and **S2C**). All trimer-binding mAbs, except for M1H3K3, neutralized the autologous  
172 tier 2 BG505.T332N with up to 63-fold difference in the half maximal inhibitory concentration  
173 ( $IC_{50}$ ) value (**Fig. 1F**, left). The NGS-derived mAb from M4 (M4H2K1) appeared to be the most  
174 potent neutralizer with an  $IC_{50}$  value of 0.067  $\mu\text{g/ml}$ , which is 2- to 5-fold higher  $IC_{50}$  than bNAbs  
175 PGT121 (0.029  $\mu\text{g/ml}$ ) and PGT128 (0.013  $\mu\text{g/ml}$ ), respectively (68). In terms of potency, this  
176 mouse NAb was comparable to those C3/V5-specific autologous NAbs isolated from NHPs, which  
177 showed a median  $IC_{50}$  value of 0.06  $\mu\text{g/ml}$  (66). Despite stronger Env binding, the sorting-derived  
178 M4-Ab3 and M4-Ab9 neutralized BG505.T332N less effectively than M4H2K1 with up to 4.6-

179 fold higher IC<sub>50</sub> values. In comparison, other NGS-derived HC-KC pairs only exhibited low levels  
180 of autologous neutralization at high immunoglobulin G (IgG) concentrations (**fig. S2B**, top panel).  
181 When tested against a tier 1 clade B virus SF162, M1H3K3 yielded an IC<sub>50</sub> value of 0.36 µg/ml,  
182 whereas the other four autologous tier 2 NAbs did not exhibit any reactivity with SF162 (**Fig. 1F**,  
183 right; **fig. S2B**, middle panel). All mouse mAbs did not neutralize the murine leukemia virus  
184 (MLV) Env-pseudotyped virus except for M4-Ab9, which showed non-specific signals at high IgG  
185 concentrations (**fig. S2B**, bottom panel). Lastly, we assessed the neutralizing activity of these  
186 mouse mAbs against a global panel of 12 isolates (71). Using MLV as a negative control in TZM-  
187 bl assays, M1H3K3 from M1, but not any of the M4 mAbs, modestly neutralized two heterologous  
188 HIV-1 isolates, clade A/E pCNE8 and clade G pX1632 (**fig. S2C**).

189 In brief, a panel of mAbs was identified from mice immunized with an I3-01 60-mer using  
190 a BG505 Env probe in two B cell sorting strategies followed by NGS and bioinformatics analysis.  
191 Functional evaluation confirmed that M4H2K1 is an autologous tier 2 NAb with high potency,  
192 whereas M1H3K3 is less potent but cross-reactive with other tier 2 isolates. These two murine  
193 NAbs neutralized HIV-1 by targeting as yet unidentified epitopes in the gp120 subunit.

#### 194 **Autologous tier 2 mouse NAb M4H2K1 binds laterally to the BG505 Env trimer**

195 Previously, a modified BG505 SOSIP.664 trimer (RC1) displayed on virus-like particles (VLPs)  
196 expanded mouse germinal center (GC) B cells specific to the V3 glycan patch (46). In a recent  
197 study, Ringe et al. reported that mice immunized with the soluble trimer generated autologous  
198 serum neutralizing response to the glycan hole at position 289 (44). Here, we combined negative-  
199 stain EM (nsEM) and x-ray crystallography to elucidate the mechanism of how M4H2K1, one of  
200 the most potent murine NAbs identified thus far, interacts with HIV-1 Env.



201 We first performed EM analysis to visualize where the mouse NAb M4H2K1 binds on the  
202 BG505 Env trimer. We produced the antigen-binding fragment (Fab) of M4H2K1 and incubated  
203 with the BG505 UFO.664 trimer to form a complex, which was subjected to single-particle nsEM  
204 analysis (**fig. S3A**). The three-dimensional (3D) reconstruction showed that the major species of  
205 this complex was Env trimers each bound to three M4H2K1 Fabs, with each Fab approaching the  
206 Env laterally (**Fig. 2A**, leftmost). After fitting a crystal structure of BG505 SOSIP.664 [PDB ID:  
207 4TVP (72)] into the EM electron density, M4H2K1 was found to interact with an epitope that lies  
208 approximately in the gp120 C2/C3/V4/V5 region. To determine how much the M4H2K1 epitope  
209 overlaps with the neighboring bNAb epitopes, EM maps containing Fabs of four representative  
210 bNAbs, VRC01 (73), 2G12 (74), PGT135 (75), and 8ANC195 (76), were aligned to the M4H2K1  
211 EM complex (**Fig. 2A**, right four). Our analysis revealed that M4H2K1 and VRC01 (but not other  
212 NAbs) would “clash” in their Env-bound mode as indicated by slightly overlapping EM densities,  
213 suggesting that the M4H2K1 epitope is in proximity to the CD4bs targeted by VRC01.

214 We then applied x-ray crystallography to further understand the molecular interactions of  
215 M4H2K1 with BG505 Env. To this end, we first obtained the crystal structure of M4H2K1 Fab at  
216 1.50 Å resolution (**fig. S3B**). In this structure, HCDR3 (10 aa) is sandwiched between HCDR1 and  
217 KCDR2, while KCDR3 (9 aa) fits between KCDR1 and HCDR2 (**fig. S3B**). To gain more atomic  
218 details of the M4H2K1-Env interaction, we generated a gp120 core from the clade A BG505 Env  
219 to complex with Fab M4H2K1 as well as Fab 17b (77) to aid in crystallization. A crystal structure  
220 of this complex was determined at 4.30 Å resolution in an orthorhombic (P2<sub>1</sub>2<sub>1</sub>2) crystal lattice.  
221 The structure showed that M4H2K1 Fab bound to the BG505 gp120 core by targeting the  
222 C2/C3/V4/V5 region (**Fig. 2B** and **2D**). We then superimposed the M4H2K1 Fab-gp120 core  
223 complex onto a protomer of the BG505 SOSIP.664 trimer (PDB ID: 5CEZ) (78), which defined



224 the orientation of M4H2K1 Fab HC and KC relative to BG505 Env in a lateral binding mode (**Fig.**  
225 **2C**). The extended HCDR2 (19 aa) and KCDR1 (15 aa) engage the trimer in a pincer-like grasp  
226 (magenta and cyan loops in **Fig. 2C**). A total of 865 Å<sup>2</sup> of the Fab is buried on the BG505 gp120  
227 core surface, where HC and KC contribute to 70% and 30% of the Fab-buried surface area (BSA),  
228 respectively (**Fig. 2D** and **fig. S3C**). The tip of the HCDR2 loop is deeply buried (348 Å<sup>2</sup>) inside  
229 the pocket formed by multiple parts of C2/C3/V5 (**Fig. 2D** and **fig. S3C**) and makes most contact  
230 with Env, followed by KCDR1 with the next largest BSA of 193 Å<sup>2</sup>. In addition, the other CDRs  
231 (BSA; H3: 117 Å<sup>2</sup>, H1: 130 Å<sup>2</sup>, L3: 67 Å<sup>2</sup>) and HC framework region 1 (BSA; HFR1: 9 Å<sup>2</sup>) are  
232 buried into the gp120 core surface except for KCDR2, which has no BSA (**fig. S3C**). This analysis  
233 highlights the importance of a long HCDR2 (19 aa) in anchoring M4H2K1 Fab to Env in a lateral  
234 orientation. Despite the moderate resolution, interactions at the interface of BG505 gp120 core and  
235 M4H2K1 Fab could be observed with little ambiguity. A hydrogen bond network in the interface  
236 appears to be formed by HCDR1 (N31), HCDR2 (R52), and HCDR3 (Y105) in M4H2K1 Fab and  
237 T278, R350, K351, N356, S460, T461, N462, and S463 in the BG505 gp120 core (**Fig. 2E**). To  
238 determine the regions involved in steric clashes between M4H2K1 and VRC01 Fabs upon EM  
239 fitting (**Fig. 2A**, panel 2 to the left), we superimposed the crystal structure of M4H2K1 Fab-BG505  
240 gp120 core complex onto VRC01-bound BG505 F14 SOSIP trimer (PDB ID: 6V8X (79)). The  
241 overlap between the 19aa-long HCDR2 loop of M4H2K1 Fab and LCDR1 of VRC01 Fab would  
242 suggest competition between M4H2K1 and VRC01-class bNAbs for Env binding (**fig. S3D**). Due  
243 to similar steric hindrance, the IOMA-class bNAbs (80) could also compete with M4H2K1 for  
244 Env binding.

245 In a recent study, a group of NAbs was isolated from guinea pigs immunized with a BG505  
246 SOSIP.664 trimer (81). Of these NAbs, CP506 Fab targets the C3/V4 region of HIV-1 Env and

247 neutralizes BG505.T332N with an IC<sub>50</sub> value of 0.1 µg/ml. To compare the angle of approach  
248 between M4H2K1 and CP506 Fabs, we first constructed a model of M4H2K1 Fab-bound BG505  
249 Env trimer by superimposing our crystal structure of M4H2K1 Fab-BG505 gp120 core complex  
250 onto the BG505 SOSIP.664 trimer (PDB ID: 4TVP (72)). We then docked this model into the 3D  
251 reconstruction of CP506 Fab-BG505 SOSIP.664 trimer complex derived from the nsEM analysis  
252 (EMD-9003). A slight variation in angle of approach was observed (**fig. S3E**). In comparison with  
253 CP506, which has a 16-aa HCDR2 and an 8-aa HCDR3, M4H2K1 utilizes longer HCDR2 (19-aa)  
254 and HCDR3 (10-aa) to recognize HIV-1 Env. The crystal structure (**Fig. 2B**) suggests that glycans  
255 at N276, N339, N355, N363, and N462, as well as amino acids I396 and S463 (**Figs. 2D and 2E**),  
256 may be involved in BG505 Env recognition by M4H2K1. Glycans N234 and N386 point sideways  
257 with no direct contact with M4H2K1. To verify these interactions, we created nine BG505.T332N  
258 variants, N276A, N339A, N355A, N363A, N462A, I396R and S463R, along with N392A and  
259 N398A, which are in proximity to the binding site, and tested their neutralization by four of newly  
260 identified mouse NAb (**Fig. 2F**). While glycan knockouts (KO) at positions 276, 339, 392, and  
261 398 and the S463R mutation exhibited little to modest effect, glycan KOs N355A, N363A, and  
262 N462A and the I396R mutation significantly reduced or completely abrogated neutralization by  
263 the mouse NAb (**Fig. 2F**), suggesting that glycans at N355 and N363, as well as a contribution  
264 by glycan N462, along with I396 are critical for M4H2K1-Env interaction. In contrast, glycans at  
265 N339, N363 and N392 were critical for Env recognition by the guinea pig NAb, CP506 (81), which  
266 targets an overlapping C3/V4 epitope. Lastly, we examined the conservation of three critical  
267 residues (N355, N363, and I396) in 6,966 HIV-1 Env sequences ([www.hig.lanl.gov/](http://www.hig.lanl.gov/)). A large  
268 fraction of isolates contain an NXT/S sequon at N355 (~80%) and N462 (~42%) as does BG505,

269 whereas positions 363 and 396 are less conserved in the group M isolates, with 9% being Asn and  
270 4.5% being Ile, respectively, leading to the autologous nature of NAb M4H2K1.

271 In summary, our structural analysis identified a critical epitope on BG505 Env that can be  
272 recognized by potent murine NAb exemplified by M4H2K1. Compared to CP506, a guinea pig  
273 NAb targeting C3/V4 (81), M4H2K1 achieves its potency by interacting with an expanded Env  
274 surface area spanning C2/C3/V4/V5. A less potent NAb from another mouse, M1H2K1, exhibited  
275 similar sensitivity to a panel of BG505.T332N variants in TZM-bl neutralization assays (**Fig. 2F**),  
276 suggesting that this NAb may recognize a similar epitope to M4H2K1, albeit with differential  
277 effects of mutations at N363, N392, and S463.

### 278 **Stabilized BG505 trimer and ferritin nanoparticle elicit glycan hole NAb in rabbits**

279 Extensive studies of native-like trimers, particularly of the BG505 backbone, have revealed that  
280 the autologous NAb response in rabbits was mainly directed to “glycan holes” (54-61). Strategies  
281 intended to broaden the autologous NAb response in rabbit immunization with mixed SOSIP.664  
282 trimers of two different clades and with the immune complex of a BG505 SOSIP.664 trimer and a  
283 glycan hole mAb proved not to be effective (82, 83). Previously, we immunized rabbits with a  
284 BG505 trimer containing a redesigned HR1 bend, termed gp140.664.R1, and an FR NP displaying  
285 this trimer (37) (**Fig. 3A**). The gp140.664.R1-FR NP elicited a more rapid autologous tier 2 NAb  
286 response than the soluble trimer (37). Here, we sought to isolate NAb from previously immunized  
287 rabbits for functional evaluation, repertoire profiling, and epitope mapping.

288 We first assessed rabbit plasma at the last time point (week 30) against autologous tier 2  
289 clade A BG505.T332N, tier 1 clade B SF162, and a global panel of 12 diverse isolates, with MLV  
290 included as a negative control (**Fig. 3B**). Half maximal inhibitory dilutions (ID<sub>50</sub>) were calculated

291 from percent neutralization upon fitting (**fig. S4**). Consistent with our previous finding (37), the  
292 FR NP, BG5050 gp140.664.R1-FR, elicited a more potent autologous tier 2 NAb response than  
293 the soluble trimer, BG505 gp140.664.R1, with an ID<sub>50</sub> values of 222 to 783 for three of four  
294 rabbits, whereas only one of four rabbits in the trimer group yielded a detectable ID<sub>50</sub> value (192)  
295 using a 100-fold starting dilution. While the week-30 plasma from both groups neutralized clade  
296 A p398F1, only the soluble trimer group showed consistent measurable neutralization against a  
297 clade A/E recombinant strain (pCNE8) using a 40-fold starting dilution. The week-30 rabbit  
298 plasma potently neutralized tier 1 SF162 without non-specific MLV reactivity. As another control,  
299 pre-immunization samples (-d10) were tested against the global panel in TZM-bl assays and  
300 exhibited a clean background (**fig. S4**).

301 We selected RB35 in the trimer group and RB63 in the FR group for antibody isolation.  
302 Using the biotinylated Avi-tagged HR1-redesigned BG505 trimer probe (67, 68), we isolated Env-  
303 specific single B cells from PBMCs. A panel of rabbit mAbs was reconstituted from cloned HCs  
304 and KCs using a previously reported protocol (55), producing 34 and 55 HC-KC pairs for RB35  
305 and RB63, respectively (**fig. S5A**). A rapid functional screening based on antibody yield and  
306 BG505.T332N neutralization resulted in three hits, one from RB35, and two from RB63 (**fig. S5A**).  
307 Sequence analysis revealed diverse germline gene usage (**fig. S5B**): RB35-1B11 is derived from  
308 IGHV1S45\*01 and IGKV1S36\*01, while RB63-1E7 and RB63-4B5 use the same HC germline  
309 gene (IGHV1S40\*01); their KCs are of IGKV1S10\*01 and IGKV1S15\*01 origin, respectively.  
310 In ELISA, the three rabbit NAb were tested against BG505 UFO.664 trimer (19) and four epitope  
311 probes, including a BG505 gp120-FR (41), an N332-I3-01 NP termed 1GUT\_A\_ES-I3-01 (37), a  
312 trimeric scaffold (PDB: 1TD0) presenting ZM109 V1V2 (termed ZM109 V1V2-5GS-1TD0), and  
313 a FP-5GS-1TD0. As indicated by the EC<sub>50</sub> values as well as ELISA curves, all three rabbit NAb

314 showed high affinity for the trimer and gp120 probes (**Fig. 3C**, left), but no detectable binding to  
315 the N332, V1V2, and FP probes (**fig. S5C**), suggesting that they recognize other epitopes in gp120  
316 of BG505 Env. All three NAbs neutralized the autologous tier 2 clade A BG505.T332N, but not  
317 the tier 1 clade B SF162 and negative control, MLV (**Fig. 3C**, right; **fig. S5D**). Of note, the most  
318 potent rabbit NAb, RB63-4B5, yielded an  $IC_{50}$  value of 0.022  $\mu\text{g/ml}$ , which is ~3-fold and 5-fold  
319 lower than the  $IC_{50}$  values of mouse NAb M4H2K1 and previously identified glycan hole NAbs  
320 (55), respectively. Lastly, all three rabbit NAbs showed negligible neutralization against the 12-  
321 virus global panel (**fig. S5E**). Six non-NAbs, three from each rabbit, were confirmed to be non-  
322 reactive with BG505.T332N in TZM-bl assays (**fig. S5F**).

323 To examine B cell lineages associated with these three NAbs, we applied NGS to analyze  
324 the Env-specific B cells from RB35 and RB63. Using the HR1-redesigned trimer probe, we sorted  
325 363 and 370 Env-specific B cells from RB35 and RB63, respectively (**fig. S6A**). Unbiased rabbit  
326 antibody HC and KC libraries were constructed for sequencing on the Ion S5 platform using a 5'-  
327 RACE PCR protocol (84). NGS produced ~1.1 and 1.9 million raw reads for RB35 and RB63,  
328 respectively, providing sufficient coverage for both HC and KC repertoires after processing using  
329 a rabbit antibodyomics pipeline (**fig. S6B**). B cell repertoire profiles revealed focused HC germline  
330 gene usage of IGHV1S40 (>22%), IGHV1S45 (>46%), and IGHV1S47 (>6%) accompanied by a  
331 broader and more diverse distribution of KC germline genes, but with some light chains more  
332 highly preferred (**fig. S6C**). Notably, RB63, which was immunized with a BG505 gp140.664.R1-  
333 FR NP, showed a higher degree of SHM for KCs than RB35, which was immunized with a soluble  
334 BG505 trimer (**fig. S6C**). In addition, RB63 appeared to have generated a large percentage (~50%)  
335 of the B cell lineage with a much longer (22-aa) HCDR3 loop (**fig. S6C**). We then investigated the  
336 lineage prevalence of three potent rabbit NAbs and four non-NAbs (two per rabbit) within the

337 NGS-derived repertoires (**Fig. 3D** and **fig. S6D**). Using a CDR3 identity cutoff of 95% (90% for  
338 RB63-4B5), putative somatic variants were identified for HC and KC of each antibody. All three  
339 NAbs exhibited reasonable lineage size, as indicated by the distribution of NGS-derived variants  
340 on the 2D plots, whereas non-NAbs showed either no somatic variants or highly expanded  
341 population, suggesting that they were either non-specific Env binders or induced by Env  
342 vaccination but failed to achieve any neutralizing activity during maturation.

343         Lastly, we examined whether these potent autologous NAbs target the previously identified  
344 glycan holes. We created a set of BG505.T332N Envs bearing mutations Q130N, D230N/K232T,  
345 S241N, P291T, and T465N (55, 58). Neutralization by three rabbit NAbs was tested in the TZM-  
346 bl assay against these BG505.T332N mutants except for D230N/K232T, which was not included  
347 due to the low yield of pseudoparticles (**Fig. 3E**). Among the four glycan hole mutations, Q130N  
348 did not affect HIV-1 neutralization by any of the three rabbit NAbs. In contrast, S241N and P291T  
349 completely abrogated neutralization by RB35-1B11 and RB63-1E7, but not for the more potent  
350 RB63-4B5, whereas T465N significantly reduced the potency of RB63-4B5 ( $IC_{50} > 5.0 \mu\text{g/ml}$ ),  
351 confirming that these three NAbs were targeting the glycan holes at positions 241/289 and 465  
352 that were reported in previous rabbit studies (55, 58). We then performed TZM-bl assays to  
353 investigate the prevalence of these glycan hole NAbs in total polyclonal NAb response. Indeed,  
354 plasma neutralization against the four BG505.T332N mutants demonstrated that filling glycan  
355 holes partially depleted the neutralizing activity (**Fig. 3F** and **fig. S6E**), consistent with recent  
356 findings that autologous rabbit NAbs could recognize a variety of epitopes other than glycan holes  
357 (57, 59). Notably, the trimer group showed a more visible reduction when glycan holes at 241/289  
358 were filled, suggesting a preference of trimer-induced autologous NAb response for these two

359 specific sites. Ferritin display was able to diversify but not broaden the NAb response, which  
360 nevertheless remained autologous.

361 By combining single-cell antibody isolation, functional elevation, and repertoire NGS, we  
362 demonstrated that a gp41-stabilized BG505 trimer and its FR NP can elicit potent autologous tier  
363 2 NAbs targeting previously identified glycan holes. It remains unclear whether E2p and I3-01 60-  
364 mers (37, 41) can redirect or broaden the NAb response more effectively than FR 24-mer. EM-  
365 based epitope mapping may be used in future studies to reveal other vulnerable sites recognized  
366 by trimer and NP-induced polyclonal antibody responses in rabbit immunization (61).

### 367 **Structural, functional, and in vivo characterization of a tier 2 clade C T/F Env**

368 BG505 trimers, regardless of the design and display platforms, mostly induced glycan hole NAbs  
369 in rabbits (55). It is therefore imperative to identify HIV-1 Envs capable of eliciting a broader NAb  
370 response during immunization. Clade C viruses are important as they are responsible for about half  
371 of the global infections (85). NFL trimers have been designed for a tier 2 clade C T/F strain, 16055,  
372 to facilitate structural analysis of clade C Envs (31). This NFL trimer induced a bNAb response in  
373 rabbits when displayed on liposome NPs and immunized using a heterologous regimen (30). In  
374 our previous studies, we demonstrated various HR1 redesigns, as well as UFO and UFO-BG trimer  
375 designs, for Env of a tier 2 clade C T/F strain, Du172.17 (19, 37). Here, we assessed the potential  
376 of this clade C Env as a template for HIV-1 vaccine design.

377 We first determined the crystal structure for a Du172.17 Env trimer, which is cleaved and  
378 contains a strain-specific HR1 redesign [(HR1-#4 (19), or simply R4]. This construct, termed  
379 Du172.17 gp140.664.R4, was expressed in HEK239S cells and purified on a 2G12 affinity column  
380 (14) before adding Fabs PGT124 and 35O22 to aid in crystallization. The Fab-bound Du172.17



381 trimer complex crystallized at 20°C, and its structure was determined at 3.40 Å resolution in an  
382 hexagonal (P6<sub>3</sub>) crystal lattice (**Fig. 4A**). The HR1 bend in this construct was designed specifically  
383 to stabilize the prefusion Du172.17 Env (19) and, therefore, is different from the HR1 bend  
384 designed for BG505 Env (**Fig. 4B**). Little difference was observed in the overall Env structure (C $\alpha$   
385 RMSD = 0.6 Å) between BG505 gp140.664.R1 and Du172.17 gp140.664.R4 except in the N  
386 terminus of HR1, termed HR1<sub>N</sub> (**Fig. 4C**). To further evaluate the difference in overall Env  
387 conformation and the redesigned HR1<sub>N</sub>, we superimposed the Du172.172 protomer onto crystal  
388 structures previously determined for clade A, B, and C Envs (**Fig. 4C**). As expected, Du172.17  
389 gp140.664.R4 adopts a protomer structure similar to BG505 SOSIP.664 (78), B41 SOSIP.664  
390 (86), and 16055 NFL.664 (31) with a C $\alpha$  RMSD of 0.6 Å. Nevertheless, a large conformational  
391 change in HR1<sub>N</sub> was observed between Du172.17 and BG505; comparison to the other Envs with  
392 their native-like full-length HR1 was not possible due to disorder in the HR1<sub>N</sub> helical region in  
393 their crystal structures. In addition, we superimposed the Du172.17 gp140.664.R4 protomer onto  
394 crystal structures and cryo-EM models of several clade C Envs [PDB ID: 5UM8 (31), PDB ID:  
395 6P65 (30), PDB ID: 6MY Y (87), PDB ID: 6UM6 (88)]. Although the sequence identity among  
396 these clade C Envs is 76-78%, they share a high structural similarity with C $\alpha$  RMSDs of 0.7-1.3 Å  
397 (**fig. S7**). Taken together, the low C $\alpha$  RMSD values observed for SOSIP, NFL, and HR1-  
398 redesigned trimers suggest that the HR1<sub>N</sub> modification has no adverse impact on the overall Env  
399 architecture and compactness.

400 Previously, we compared glycosylation profiles of BG505 SOSIP.664 and HR1-redesigned  
401 trimers produced in ExpiCHO cells (37). Here, we compared glycosylation patterns of HEK293F-  
402 expressed SOSIP, HR1-redesigned, and UFO trimers to determine whether trimer design affects  
403 the glycans in the major epitopes on Du172.17 Env. Secreted proteins were harvested from media



404 and purified on a PGT145 affinity column (15) followed by size exclusion chromatography (SEC)  
405 on a Superdex 200 column. Liquid-chromatography mass spectrometry (LC-MS) was employed  
406 to determine site-specific glycosylation (**fig. S8**), which was enabled by digesting the Env proteins  
407 into peptides and glycopeptides using three separate proteases: trypsin, chymotrypsin, and elastase.  
408 The relative proportions of different glycans were determined and grouped to facilitate comparison  
409 between the samples (**fig. S8**). The key features that define native-like glycosylated trimers include  
410 the high mannose content and the occupancy at each site. The majority of *N*-linked glycosylation  
411 sites on all three trimers contain high amounts of oligomannose-type glycans. Conserved glycan  
412 sites across HIV-1 strains that presented oligomannose-type glycans include the N332 supersite  
413 and the apex glycan N160. All three design formats have ~100% occupancy at these sites with  
414 oligomannose-type glycans, consistent with a well-folded native-like trimer. The complex-type  
415 glycans observed across the samples are fucosylated bi- and tri-antennary glycans that are common  
416 in HEK293F or CHO cells. The occupancy at every site in all three trimers is greater than 95%  
417 except for N611. However, glycan holes may still be present at sites that could not be resolved in  
418 this analysis (**fig. S8**). As expected, the only regions with significant deviation in glycosylation  
419 were all within the gp41 ectodomain (gp41<sub>ECTO</sub>). While no oligomannose-type glycans were  
420 observed at N611 on SOSIP, high mannose content was observed on HR1 redesign and UFO, 67%  
421 and 24%, respectively. Likewise, SOSIP and HR1 redesign contained 39% and 51%  
422 oligomannose-type glycans at N625, whereas UFO had no oligomannose-type glycans at this site.  
423 Our data suggest that the steric restrictions imposed upon the glycan sites by surrounding protein  
424 regions differ slightly and most of epitopes in gp120 and at the gp120-gp41 interface will not be  
425 affected by the design platform.

426           After structural characterization and glycan analysis of three design platforms for this clade  
427 C Env, we assessed two Du172.17 Env immunogens along with a UFO-BG trimer designed for a  
428 tier 2 clade A T/F strain, Q842.d12, in three groups of rabbits. To maximize the outcome of *in vivo*  
429 assessment for Du172.17 Env, we tested a Du172.17 UFO-BG trimer and a FR NP presenting the  
430 structurally defined Du172.17 gp140.664.R4 trimer (**Fig. 4A**). Of note, the same regimen was used  
431 to facilitate comparison with the previous BG505 immunization (**Fig. 3A**) (37). We first assessed  
432 rabbit plasma at the last time point (week 30) against an expanded panel of viruses including the  
433 respective autologous virus (either Du172.17 or Q842-d12), BG505.T332N, tier 1 SF162, and the  
434 12-virus global panel, with MLV included as a control (**Fig. 4D** and **fig. S9**). Overall, distinct  
435 neutralization patterns were observed compared to the previous BG505 immunization (**Fig. 3B**).  
436 Using a 100-fold starting dilution, autologous NAb responses were not observed for any group  
437 except for the plasma from RB50 in the Du172.17 trimer group, which also neutralized all tested  
438 HIV-1 isolates and exhibited a detectable non-specific response to MLV (**fig. S9A**). The lack of  
439 autologous neutralization here therefore differed significantly from our previous study (37), where  
440 a robust autologous NAb response was observed for three of four rabbits in the BG505  
441 gp140.664.R1-FR group (**Fig. 3B**). Furthermore, the clade C Du172.17 trimer and FR NP elicited  
442 consistently, albeit slightly, stronger NAb responses to clade A p398F1 than did their clade A  
443 BG505 counterparts, using a 40-fold starting dilution. Weak but consistent plasma neutralization  
444 was also developed against other isolates such as clade C p25710 and clade B pX2278 in rabbits  
445 immunized with the clade C Du172.17 gp140.664.R4-FR NP, but less so in the other two trimer  
446 groups irrespective of the Env origin. In terms of tier 1 NAb response, the clade A Q842-d12 trimer  
447 elicited the most potent response with ID<sub>50</sub> values of 344 to 1554, whereas the clade C Du172.17  
448 gp140.664.R4-FR NP yielded ID<sub>50</sub> values of 162 or lower. As multiple studies have shown that

449 BG505 Env mainly induced autologous NAb responses to glycan holes, our current study indicated  
450 that other Envs may elicit a broader response with the potential to neutralize more HIV-1 isolates.  
451 Pre-immunization (-d10) samples exhibited negligible reactivity on the 12-virus panel, indicating  
452 a clean background (**fig. S9**). Lastly, we characterized the longitudinal NAb development for the  
453 clade C Du172.17 trimer and FR groups (**Fig. 4E** and **fig. S10**). The soluble trimer elicited a more  
454 rapid tier 1 NAb response to clade B SF162 than the gp140-FR NP and, for most time points, this  
455 response also appeared to be more potent than the NP-induced tier 1 NAb response (**Fig. 4E**, left).  
456 However, the tier 2 NAb response to clade A p398F1 exhibited a distinct pattern compared to the  
457 tier 1 NAb response, with plasma neutralization (measured by ID<sub>50</sub>) only observed for week 14  
458 and onwards (**Fig. 4E**, right). The difference in such a tier 2 response was not significant between  
459 trimer and FR groups, likely due to the small group size and the outlier (RB50) in the trimer group.

460         The crystal structure of a novel tier 2 clade C T/F Env confirmed the effectiveness of HR1  
461 redesign in trimer stabilization. The rabbit study on three Env immunogens derived from two T/F  
462 Envs of different subtypes suggested that the BG505-elicited glycan hole NAb responses may be  
463 specific to BG505 Env and that other HIV-1 Envs may achieve a broader NAb response. However,  
464 elicitation of a potent bNAb response remains a challenge for HIV-1 vaccine design.

## 465 **DISCUSSION**

466 HIV-1 vaccine development has entered a new era since the demonstration of tier 2 NAb responses  
467 in rabbits and NHPs elicited by vaccination of prototypic native-like SOSIP.664 trimers (51, 89).  
468 The success of BG505 SOSIP.664 trimer as a structural template to study bNAb-Env interactions  
469 and as an Env backbone to experiment with various rational designs has led to a plethora of studies  
470 that position native-like Env trimers at the center of HIV-1 vaccine research (12, 20). However,  
471 some fundamental questions related to the inherent features of HIV-1 Env need to be addressed to

472 guide future vaccine development (90). Critical issues related to trimer design, particulate display  
473 platforms, and animal models for vaccine evaluation, will remain open questions while multiple  
474 vaccine strategies continue to be explored in parallel.

475 In this follow-up study, we examined some of these issues by utilizing animal samples  
476 generated in our previous study (37) and by conducting new immunization experiments. First, we  
477 provide evidence at the monoclonal level that potent tier 2 NAb can be elicited in the wildtype  
478 mouse model using a multivalent Env immunogen. The nsEM model and crystal structure of NAb  
479 M4H2K1 in complex with BG505 Env identified a target for potent mouse NAb – an epitope that  
480 is recognized by the autologous NAb response in early human infection (5). Together with another  
481 cross-clade NAb, M1H3K3, our study indicates that wildtype mice provide a useful small animal  
482 model for testing HIV-1 vaccines. However, the non-specific antiviral component in mouse serum  
483 poses a challenge for pseudovirus neutralization assays and has been the source of inconsistencies  
484 in recent studies (37, 44, 45, 91). Thus, purified IgG must be used to unambiguously demonstrate  
485 the elicitation of tier 2 NAb in mouse immunization (37). Since the tier 2 NAb response can be  
486 readily observed in rabbits and such NAb often target glycan holes, wildtype mice may offer a  
487 more advantageous animal model for evaluating HIV-1 vaccine designs and understanding their  
488 immunologic mechanisms, as shown in recent studies of multivalently displayed Envs in mice (91-  
489 93). Second, we provide evidence at the monoclonal level that BG505 Env bearing a redesigned  
490 HR1<sub>N</sub> segment (the core of the UFO trimer design (19)), both as a soluble trimer and on a 24-  
491 meric FR NP, can induce potent tier 2 NAb, which, however, are mostly directed to the known  
492 glycan holes (55, 59). Display of BG505 trimers on this small protein NP did not broaden the  
493 autologous NAb response in rabbits (37) (**Fig. 3B**). These results, together with the recent finding  
494 from a rabbit study of mixed BG505 and B41 SOSIP trimers, highlight a limitation of the rabbit

495 model for evaluation of HIV-1 Env vaccines. Nonetheless, the multivalent display on E2p and I3-  
496 01 60-mers may still warrant investigation, as glycan-modified NFL trimers on liposome NPs  
497 elicited an impressive cross-clade NAb response in rabbits (30). Third, we demonstrated that a  
498 strain-specific HR1 redesign could render a stable, native-like trimer for a tier 2 clade C T/F Env,  
499 which appeared to modestly broaden the NAb response in rabbits. In contrast, a tier 2 clade A Env-  
500 derived UFO-BG trimer exhibited a narrow NAb response. Nonetheless, the crystal structure of  
501 Du172.17 Env provides a valuable template for clade C-specific HIV-1 vaccine development. Our  
502 new study also indicates that the breadth of vaccine-elicited NAb response may be related to  
503 particular features in Env backbone, highlighting the necessity for screening diverse Envs in HIV-  
504 1 vaccine design.

505         Based on our previous studies of Env design and NP display (19, 37, 41), several directions  
506 may be explored in our future HIV-1 vaccine effort. First, more advanced NP platforms may be  
507 employed to display the stabilized Env trimers. Recently, we reengineered E2p and I3-01 60-mers  
508 to develop single-component, multilayered, self-assembling protein NPs as vaccine carriers, which  
509 were successfully used to present stabilized Ebola virus (EBOV) and SARS-CoV-2 glycoproteins  
510 (94, 95). These newly engineered NPs offer potential advantages in stability, immunogenicity, and  
511 manufacturability in comparison with the two-component NP platforms (39, 40). Second, an in-  
512 depth immunological understanding will be crucial for the future development of UFO trimers and  
513 UFO-NP vaccines, as demonstrated for other HIV-1 vaccine candidates (91-93, 96). In our proof-  
514 of-concept study of hepatitis C virus (HCV) vaccines, NPs presenting optimized E2 cores elicited  
515 NAb responses more effectively than E2 core alone, with quantitative B cell patterns revealed by  
516 NGS (97). Analysis of NP retention, trafficking and germinal center activation (98) may provide

517 the much-needed insight into the mode of action of NP vaccines. Critical questions related to HIV-  
518 1 Env (90) can therefore be pursued in the context of UFO trimers and UFO-NPs.

## 519 **MATERIALS and METHODS**

### 520 **Expression and purification of HIV-1 Env probes, trimers, and gp140 nanoparticles**

521 The Avi-tagged BG505 gp140.664.R1 trimer probe was transiently expressed in HEK293F cells  
522 (Thermo Fisher) (67). Env protein was purified from the supernatant by a *Galanthus nivalis* lectin  
523 (GNL) column (Vector Labs) and eluted with PBS containing 500 mM NaCl and 1 M methyl- $\alpha$ -  
524 D-mannopyranoside. Biotinylation was performed using the BirA biotin-protein ligase standard  
525 reaction kit (BirA-500) as per the manufacturer's instructions (Avidity). This BG505 trimer probe  
526 was further purified by SEC on a HiLoad 16/600 Superdex 200 PG column (GE Healthcare). A  
527 ferritin (FR) NP presenting BG505 V1V2 and a trimeric scaffold (1TD0) presenting ZM109 V1V2  
528 were transiently expressed in *N*-acetylglucosaminyltransferase I-negative (GnTI<sup>-/-</sup>) HEK293S cells  
529 (Thermo Fisher) (41). Both FR and I3-01 NPs presenting an N332-scaffold, 1GUT\_A\_ES, were  
530 transiently expressed in HEK293F cells treated with Kifunensine (TOCRIS Bioscience) (69). Both  
531 V1V2 and N332 epitope probes were extracted from the supernatant using a GNL column. Fusion  
532 peptide (FP) probes were created by fusing the FP motif, AVGIGAVFL, to a FR or 1TD0 subunit  
533 with a 5GS (G<sub>4</sub>S) linker. The FP-5GS-FR and BG505 gp120-FR probes were transiently expressed  
534 in ExpiCHO cells (Thermo Fisher) using a similar protocol to BG505 gp140 NPs (37). The trimeric  
535 FP-5GS-1TD0 probe was also transiently expressed in ExpiCHO cells. Immunoaffinity columns  
536 based on bNAbs VRC34 (99) and PGT145 (100) were used to extract two FP probes (FP-5GS-FR  
537 NP and FP-5GS-1TD0 trimer) and the BG505 gp120-FR probe from the supernatant, respectively.  
538 After purification using a GNL or antibody column, the NP and 1TD0-derived epitope probes were  
539 further purified by SEC on a Superose 6 10/300 GL column and a Superdex 75 10/300 GL column

540 (GE Healthcare), respectively. For rabbit immunization, the Du172.17 UFO-BG trimer, the FR NP  
541 presenting a structurally defined Du172.17 gp140.664.R4 trimer, which is cleaved and contains a  
542 redesigned HR1 (HR1-#4 (19)), and the Q842-d12 UFO-BG trimer were transiently expressed in  
543 ExpiCHO cells (37). For the two UFO-BG trimers, Env protein was extracted from the supernatant  
544 by a GNL column and trimer was purified by SEC on a HiLoad 16/600 Superdex 200 PG column.  
545 The Du172.17 gp140.664.R4-FR NP was purified using a 2G12 affinity column (14) followed by  
546 SEC on a Superose 6 10/300 GL column. Protein concentrations were determined using ultraviolet  
547 absorbance at 280 nm (UV<sub>280</sub>) with theoretical extinction coefficients.

#### 548 **Env-specific sorting of mouse and rabbit B cells**

549 Mouse spleen cells harvested 15 days after the last injection were prepared for sorting. Cells were  
550 first stained for the exclusion of dead cells with Fixable Aqua Dead Cell Stain (Thermo Fisher).  
551 Receptors FcγIII (CD16) and FcγII (CD32) were blocked by 20 μl of 2.4G2 mAb (BD Pharmigen).  
552 Cells were then incubated with 10 μg of biotinylated Avi-tagged BG505 gp140.664.R1 trimer  
553 probe for 5 min at 4 °C, followed by the addition of 2.5 μl of anti-mouse IgG fluorescently labeled  
554 with FITC (Jackson ImmunoResearch) and incubated for 15 min at 4 °C. Finally, 5 μl of premium-  
555 grade allophycocyanin (APC)-labeled streptavidin (Thermo Fisher) was added to the cells and  
556 incubated for 15 min at 4 °C. In each step, cells were washed with 500 μl FACS buffer (DPBS  
557 with 2% FBS). FITC<sup>+</sup>APC<sup>+</sup> Env-specific B cells were sorted using MoFloAstrios EQ (Beckman  
558 Coulter). Rabbit PBMCs obtained 30 days after the last injection were prepared for sorting. After  
559 staining for exclusion of dead cells with Fixable Aqua Dead Cell Stain (Thermo Fisher), cells were  
560 incubated with 10 μg of biotinylated Avi-tagged BG505 gp140.664.R1 trimer probe for 5 min at  
561 4 °C, followed by addition of 2 μl of anti-rabbit IgG conjugated with Dylight 405 (Jackson  
562 ImmunoResearch), 2 μl of anti-rabbit T lymphocytes fluorescently labeled with FITC (BioRad),



563 and 2  $\mu$ l of anti-rabbit IgM fluorescently labeled with FITC (BioRad), and then incubated for 15  
564 min at 4 °C. Finally, 5  $\mu$ l of APC-labeled streptavidin (Thermo Fisher) was added to the cells and  
565 incubated for 15 min at 4 °C. In each step, cells were washed with 500  $\mu$ l FACS buffer (DPBS  
566 with 2% FBS). FITC<sup>-</sup>Dylight 405<sup>+</sup>APC<sup>+</sup> Env-specific B cells were sorted using MoFloAstrios EQ  
567 (Beckman Coulter). For bulk sorting, positive cells were sorted into an Eppendorf microtube with  
568 20  $\mu$ l of lysis buffer. For single B-cell sorting, individual positive cells were sorted into the inner  
569 wells of a 96-well plate with 20  $\mu$ l of a pre-reverse transcription (RT) lysis mix containing 0.1  $\mu$ l  
570 NP40 (Sigma-Aldrich), 0.5  $\mu$ l RNase Inhibitor (Thermo Fisher), 5  $\mu$ l 5 $\times$  First Strand Buffer and  
571 1.25  $\mu$ l DTT from SuperScript IV kit (Invitrogen), and 13.15  $\mu$ l H<sub>2</sub>O per well.

#### 572 **Antibody cloning from Env-specific single B cells and antibody production**

573 Antibody cloning of Env-sorted single B cells was conducted as follows. A mix containing 3  $\mu$ l  
574 Random Hexamers (GeneLink), 2  $\mu$ l dNTPs, and 1  $\mu$ l of the SuperScript IV enzyme (Thermo  
575 Fisher) was added to each well of a single-cell sorted 96-well plate that underwent thermocycling  
576 according to the program outlined in the SuperScript IV protocol resulting in 25  $\mu$ l of cDNA for  
577 each single cell. 5  $\mu$ l of cDNA was then added to a PCR mix containing 12.5  $\mu$ l 2 $\times$  Multiplex PCR  
578 mix (Qiagen), 9  $\mu$ l H<sub>2</sub>O, 0.5  $\mu$ l of forward primer mix, and 0.5  $\mu$ l of reverse primer mix (mouse  
579 (*I01*) and rabbit (*55*)) for heavy and  $\kappa$ -light chains within each well. A second PCR reaction was  
580 then performed using 5  $\mu$ l of the first PCR as template and respective primers (mouse (*I01*) and  
581 rabbit (*55*)) utilizing the same recipe as the first PCR. The PCR products were run on 1% Agarose  
582 gel and those with correct heavy and light chain bands were then used for Gibson ligation (New  
583 England Biolabs), cloning into IgG expression vectors, and transformation into competent cells.  
584 Mouse and rabbit mAbs were expressed by transient transfection of ExpiCHO cells (Thermo



585 Fisher) with equal amount of paired heavy and  $\kappa$ -light chain plasmids and purified from the culture  
586 supernatant after 12-14 days using Protein A beads columns (Thermo Fisher).

### 587 **NGS and bioinformatics analysis of mouse and rabbit B cells**

588 We combined the 5'-rapid amplification of cDNA ends (RACE) protocol with previously reported  
589 heavy and  $\kappa$ -light chain primers for mouse (101) and rabbit (84) to facilitate NGS analysis of Env-  
590 specific mouse splenic B cells and rabbit B cells, respectively. Briefly, 5'-RACE cDNA was  
591 obtained from bulk-sorted B cells of each animal with SMART-Seq v4 Ultra Low Input RNA Kit  
592 for Sequencing (TaKaRa). The Ig PCRs were set up with Platinum *Taq* High-Fidelity DNA  
593 Polymerase (Thermo Fisher) in a total volume of 50  $\mu$ l, with 5  $\mu$ l of cDNA as template, 1  $\mu$ l of 5'-  
594 RACE primer, and 1  $\mu$ l of 10  $\mu$ M reverse primer. The 5'-RACE primer contained a PGM/S5 P1  
595 adaptor, while the reverse primer contained a PGM/S5 A adaptor. For mouse samples, we adapted  
596 the mouse 3'-C $\gamma$ 1-3/3'-C $\mu$  inner primers and 3'-mC $\kappa$  outer primer (101) as reverse primers for 5'-  
597 RACE PCR processing of heavy and  $\kappa$ -light chains, respectively. For rabbit samples, we adapted  
598 rabbit RIGHC1/RIGHC2 primers and RIGkC primers (84) as reverse primers for 5'-RACE PCR  
599 processing of heavy and  $\kappa$ -light chains, respectively. A total of 25 cycles of PCR was performed  
600 and the expected PCR products (500-600 bp) were gel purified (Qiagen). NGS was performed on  
601 the Ion S5 GeneStudio platform. Briefly, heavy and  $\kappa$ -light chain libraries from the same animal  
602 were quantitated using Qubit® 2.0 Fluorometer with Qubit® dsDNA HS Assay Kit, and then  
603 mixed at a ratio of 2:1 or 3:1 before being pooled with antibody libraries from the other animals at  
604 an equal ratio. Template preparation and Ion 530 chip loading were performed on Ion Chef using  
605 the Ion 520/530 Ext Kit, followed by sequencing on the Ion S5 system with default settings. The  
606 mouse antibodyomics pipeline (69) was used to process the mouse NGS data. The rabbit  
607 antibodyomics pipeline was created by incorporating rabbit germline genes from IMGT

608 (<http://www.imgt.org/>) into the reference libraries. Quantitative repertoire profiles were generated  
609 for germline gene usage, degree of SHM, and H/KCDR3 loop length. The two-dimensional (2D)  
610 divergence/identity plots were generated to visualize selected mouse and rabbit NAb/mAb chains  
611 in the context of Env-specific B cell repertoires. A previously described sequence clustering  
612 algorithm (67) was used to derive consensus heavy and  $\kappa$ -light chains for prevalent antibody  
613 lineages from NGS data of bulk-sorted mouse splenic B cells. NGS-derived mAbs were transiently  
614 expressed in ExpiCHO cells (Thermo Fisher) with equal amount of heavy and  $\kappa$ -light chain  
615 plasmids and purified from culture supernatants after 12-14 days using Protein A beads columns  
616 (Thermo Fisher).

#### 617 **Enzyme-linked immunosorbent assay**

618 Each well of a Costar<sup>TM</sup> 96-well assay plate (Corning) was first coated with 50  $\mu$ l PBS containing  
619 0.2  $\mu$ g of the appropriate antigens. The plates were incubated overnight at 4 °C, and then washed  
620 five times with wash buffer containing PBS and 0.05% (v/v) Tween 20. Each well was then coated  
621 with 150  $\mu$ l of a blocking buffer consisting of PBS, 40 mg ml<sup>-1</sup> blotting-grade blocker (Bio-Rad),  
622 and 5% (v/v) FBS. The plates were incubated with the blocking buffer for 1 hour at room  
623 temperature, and then washed five times with wash buffer. For antigen binding, antibodies were  
624 diluted in the blocking buffer to a maximum concentration of 10  $\mu$ g ml<sup>-1</sup> followed by a 10-fold  
625 dilution series. For each antibody dilution, 50  $\mu$ l was added to the appropriate wells. Next, a 1:5000  
626 dilution of goat anti-human IgG antibody (Jackson ImmunoResearch Laboratories, Inc) was made  
627 in the wash buffer (PBS containing 0.05% Tween 20), with 50  $\mu$ l of the diluted secondary antibody  
628 added to each well. The plates were incubated with the secondary antibody for 1 hour at room  
629 temperature, and then washed five times with PBS containing 0.05% Tween 20. Finally, the wells  
630 were developed with 50  $\mu$ l of TMB (Life Sciences) for 3-5 min before stopping the reaction with

631 50  $\mu$ l of 2 N sulfuric acid. The resulting plate readouts were measured at a wavelength of 450 nm.  
632 The EC<sub>50</sub> values were calculated in GraphPad Prism 8.4.3.

### 633 **Pseudovirus Production and Neutralization Assays**

634 Pseudoviruses were generated by transfection of HEK293T cells with an HIV-1 Env expressing  
635 plasmid and an Env-deficient genomic backbone plasmid (pSG3 $\Delta$ Env), as previously described  
636 (102). HIV-1 Env expressing vectors for BG505 (Cat# 11518), SF162 (Cat# 10463), and the global  
637 panel (71) (Cat# 12670) were obtained through the NIH AIDS Reagent Program, Division of  
638 AIDS, NIAID, NIH (<https://www.aidsreagent.org/>). A T332N mutation was introduced into  
639 BG505 Env to produce the BG505.T332N clone. Other BG505.T332N mutants were created by  
640 introducing mutations as previously described (55, 59, 81). Pseudoviruses were harvested 72 hours  
641 post-transfection for use in neutralization assays. Neutralizing activity of heat-inactivated rabbit  
642 plasma was assessed using a single round of replication pseudovirus assay and TZM-bl target cells,  
643 as described previously (102). Briefly, pseudovirus was incubated with serial dilutions of  
644 antibodies or rabbit plasma in a 96-well flat bottom plate for 1 hour at 37 °C before TZM-bl cells  
645 were seeded in the plate. For antibody neutralization, a starting concentration of 5  $\mu$ g/ $\mu$ l was used  
646 and subjected to a 3-fold dilution series in the TZM-bl assays. Rabbit plasma was diluted by 100-  
647 fold and 40-fold against autologous and heterologous pseudoviruses, respectively, and then  
648 subjected to a 3-fold dilution series in the TZM-bl assays. As a negative control, pseudoparticles  
649 displaying the envelope glycoproteins of murine leukemia virus (MLV) were tested in the TZM-  
650 bl assays following the same protocol. Luciferase reporter gene expression was quantified 48-72  
651 hours after infection upon lysis and addition of Bright-Glo™ Luciferase substrate (Promega).  
652 Data were retrieved from a BioTek microplate reader with Gen 5 software, the background  
653 luminescence from a series of uninfected wells was subtracted from each experimental well, and

654 neutralization curves were generated using GraphPad Prism 8.4.3, in which values from  
655 experimental wells were compared against a well containing virus only. To determine IC<sub>50</sub> and  
656 ID<sub>50</sub> values, dose-response curves were fit by nonlinear regression in GraphPad Prism 8.4.3.

### 657 **Expression, purification of BG505 gp120 core, Du172.17 gp140, Fabs and complex formation**

658 The antigen-binding fragments (Fabs) of M4H2K1, 17b, PGT124, and 35O22 were expressed in  
659 FreeStyle HEK293F cells (Invitrogen) and purified by CaptureSelect CH1-XL affinity (Thermo  
660 Fisher) chromatography followed by SEC on a Superdex 75 16/600 column (GE Healthcare). The  
661 BG505 gp120 core protein was transiently expressed in FreeStyle HEK293S cells, extracted from  
662 the supernatant using a GNL affinity column, followed by SEC on a Superdex 200 16/600 column  
663 (GE Healthcare). A complex was formed by combining gp120:M4H2K1:17b in a 1:2:2 molar ratio,  
664 followed by deglycosylation using endoH digestion (New England Biolabs) at 37 °C for 1 hour  
665 before SEC purification. The gp120:M4H2K1:17b complex was then analyzed by sodium dodecyl  
666 sulphate–polyacrylamide gel electrophoresis (SDS-PAGE). The clade C Du172.17 gp140.664.R4  
667 Env trimer was expressed in FreeStyle HEK293S cells. Env protein was harvested from media and  
668 purified with a 2G12 column (14) followed by SEC on a Superdex 200 column (GE Healthcare).  
669 The Du172.17 trimer complex was formed by mixing PGT124 and 35O22 Fabs in a molar ratio of  
670 1:3.5:3.5 (Du172:PGT124:35O22) at room temperature for 30 min. The trimer complex was then  
671 partially deglycosylated using endoH digestion (New England Biolabs) (23) at 37 °C for 1 hour  
672 and then purified on a Superdex 200 column. The complex was SEC-purified in 50 mM Tris-HCl,  
673 150mM NaCl (pH = 7.4) and concentrated to ~10 mg/ml prior to crystallization trials.

### 674 **Crystallization and data collection**

675 The SEC-purified Fab M4H2K1 and complex were each concentrated to 12 mg/ml before being  
676 screened at both 4 °C and 20 °C using our high-throughput CrystalMation™ robotic system

677 (Rigaku) at TSRI (103). High-quality crystals of unbound Fab M4H2K1 were grown in 0.1 M  
678 CHES (pH = 9.5) and 36% PEG600 at 4 °C, and M4H2K1 bound gp120 core complex in 0.1 M  
679 Tris (pH = 7), 1.825 M ammonium sulfate, 0.29 M lithium sulfate, and 15% ethylene glycol at 20  
680 °C. Crystals were harvested, and followed by immediate flash cooling in liquid nitrogen. The  
681 Du172.17 trimer complex was set up at both 4 °C and 20 °C using our Rigaku CrystalMation™  
682 robotic system. High-quality crystals of Fabs PGT124 and 35O22 bound to the HR1-redesigned  
683 Du172.17 trimer were obtained in 0.1 M Tris (pH = 8.4), 25% (v/v) PEG400 at 20 °C. Data were  
684 collected at Advanced Photon Source (APS) on beamlines 23-IDD and 23-IDB.

### 685 **Structure determination and refinement**

686 The unbound Fab M4H2K1 and the Fab M4H2K1- BG505 gp120 core -Fab 17b crystals diffracted  
687 to 1.50 Å and 4.30 Å resolution, respectively. The data were indexed, integrated and scaled using  
688 HKL2000 (104) in P3<sub>1</sub>21 for unbound M4H2K1-Fab and in P2<sub>1</sub>2<sub>1</sub>2 for the complex. The unbound  
689 Fab structure was solved by molecular replacement (MR) using Phaser (105) with Fab structures  
690 [PDB 5GS1 (106) for the variable region and PDB 5BZW (107) for the constant region] as MR  
691 search models. The BG505 gp120 core in complex with Fabs M4H2K1 and 17b was determined  
692 by MR using PDB 6ONF (108) for the gp120 core, the unbound Fab M4H2K1 structure for the  
693 bound Fab M4H2K1, and PDB 1GC1 (77) for Fab 17b as the search models. The unbound  
694 M4H2K1 Fab crystal structure was refined to  $R_{cryst} / R_{free}$  of 14.5%/18.4% with 99.8%  
695 completeness and unit cell parameters  $a = b = 68.3\text{Å}$ ,  $c = 184.7\text{Å}$  (**Table S1**). The Fab M4H2K1  
696 bound gp120 core complex structure was refined to  $R_{cryst} / R_{free}$  of 29.7%/33.3% with 86.8%  
697 completeness and unit cell parameters  $a = 204.0\text{Å}$ ,  $b = 60.6\text{Å}$ ,  $c = 166.7\text{Å}$  (**Table S1**). The Du172.17  
698 trimer in complex with Fabs PGT124 and 35O22 crystal diffracted to 3.40 Å resolution and the

699 diffraction data were processed (indexed, integrated and scaled) with HKL2000 in P<sub>63</sub> space  
700 group. The Du172.17 trimer in complex with Fabs PGT124 and 35O22 was determined by using  
701 PDB 5CEZ (78) for Env Du172.17 gp140, PDB 4TOY (109) for 35O22, and PDB 4R26 (110) for  
702 the Fab PGT124 structure as the MR search models. The crystal structure of the Du172.17 trimer  
703 complex was refined to  $R_{cryst}/R_{free}$  of 29.7%/31.8% and overall completeness of 97.6% and unit  
704 cell parameters  $a=b=127.0\text{\AA}$ ,  $c=316.5\text{\AA}$  (**Table S1**). Model building was carried out with Coot  
705 and refinement with Phenix (111-113). Structure quality was determined by MolProbity (114).  
706 The Kabat numbering scheme (115) was used for Fabs M4H2K1 and 17b. The BG505 gp120 core  
707 and Du172.17 trimer were numbered according to the HXB2 system (116). Structure validation  
708 was performed using the PDB Validation Server ([validate.wwpdb.org](http://validate.wwpdb.org)), PDB-care (117) and  
709 Privateer (118). Data collection and refinement statistics are shown in **Table S1**.

### 710 **Negative-stain electron microscopy**

711 Complexes of M4H2K1 Fab and BG505 UFO.664 trimer were purified by SEC to remove  
712 unbound Fab and diluted to 0.01 mg/mL in Tris-buffered saline prior to adsorption onto carbon-  
713 coated and plasma cleaned copper mesh grids (Cu400, Electron Microscopy Sciences). Grids were  
714 stained with 2% (w/v) uranyl formate for about 60 s and imaged on an FEI Tecnai Spirit  
715 microscope operating at 120 keV, equipped with a TVIPS TemCam F416 4k × 4k CMOS camera.  
716 Automated data collection was performed using Leginon (119). Particles were picked using  
717 DogPicker in the Appion software suite (120), extracted using Relion 3.0 (121), and imported into  
718 cryoSPARC v2 (122). After one round each of 2D and 3D classification, 14,027 particles were  
719 included in a 3D refinement with C3 symmetry imposed and a low pass-filtered volume of ligand-  
720 free HIV-1 Env used as the initial model. The final resolution for the negative-stain reconstruction  
721 is estimated to be ~25 Å (Fourier shell correlation cutoff of 0.5).

722 **Glycopeptide analysis by mass spectrometry**

723 Three 50 µg aliquots of each sample were denatured for 1h in 50 mM Tris/HCl, pH 8.0 containing  
724 6 M of urea and 5 mM dithiothreitol (DTT). Next, Env proteins were reduced and alkylated by  
725 adding 20 mM iodoacetamide (IAA) and incubated for 1h in the dark, followed by a 1h incubation  
726 with 20 mM DTT to eliminate residual IAA. The alkylated Env proteins were buffer-exchanged  
727 into 50 mM Tris/HCl, pH 8.0 using Vivaspin columns (3 kDa) and digested separately overnight  
728 using trypsin, chymotrypsin or elastase (Mass Spectrometry Grade, Promega) at a ratio of 1:30  
729 (w/w). The next day, the peptides were dried and extracted using C18 Zip-tip (MerckMilipore).  
730 The peptides were dried again, re-suspended in 0.1% formic acid and analyzed by nanoLC-ESI  
731 MS with an Easy-nLC 1200 (Thermo Fisher Scientific) system coupled to a Fusion mass  
732 spectrometer (Thermo Fisher Scientific) using higher energy collision-induced dissociation (HCD)  
733 fragmentation. Peptides were separated using an EasySpray PepMap RSLC C18 column (75 µm  
734 × 75 cm). A trapping column (PepMap 100 C18 3µM 75µM × 2cm) was used in line with the LC  
735 prior to separation with the analytical column. The LC conditions were as follows: 275 min linear  
736 gradient consisting of 0-32% acetonitrile in 0.1% formic acid over 240 min followed by 35 min of  
737 80% acetonitrile in 0.1% formic acid. The flow rate was set to 200 nl/min. The spray voltage was  
738 set to 2.7 kV and the temperature of the heated capillary was set to 40 °C. The ion transfer tube  
739 temperature was set to 275 °C. The scan range was 400-1600 *m/z*. The HCD collision energy was  
740 set to 50%, appropriate for fragmentation of glycopeptide ions. Precursor and fragment detection  
741 were performed using an Orbitrap at a resolution MS1= 100,000. MS2= 30,000. The AGC target  
742 for MS1 = 4e5 and MS2 = 5e4 and injection time: MS1 = 50ms MS2 = 54ms.

743 Glycopeptide fragmentation data were extracted from the raw file using Byonic™ (Version  
744 3.5) and Byologic™ software (Version 3.5; Protein Metrics Inc.). The glycopeptide fragmentation



745 data were evaluated manually for each glycopeptide; the peptide was scored as true-positive when  
746 the correct b and y fragment ions were observed along with oxonium ions corresponding to the  
747 glycan identified. The MS data were searched using the Protein Metrics 305 N-glycan library. The  
748 relative amounts of each glycan at each site, as well as the unoccupied proportion, were determined  
749 by comparing the extracted chromatographic areas for different glycotypes with an identical  
750 peptide sequence. All charge states for a single glycopeptide were summed. The precursor mass  
751 tolerance was set at 4 part per million (ppm) and 10 ppm for fragments. A 1% false discovery rate  
752 (FDR) was applied. Glycans were categorized according to the composition detected.  
753 HexNAc(2)Hex(9–5) was classified as M9 to M5, HexNAc(3)Hex(5–6)X as Hybrid with  
754 HexNAc(3)Fuc(1)X classified as Fhybrid. Complex-type glycans were classified according to the  
755 number of HexNAc residues, which are attributed to number of processed antenna/bisecting  
756 GlcNAc (B), and fucosylation (F). For example, HexNAc(3)Hex(3-4)X is assigned to A1,  
757 HexNAc(4)X to A2/A1B, HexNAc(5)X to A3/A2B, and HexNAc(6)X to A4/A3B. If all of these  
758 compositions had a fucose, they are assigned to the corresponding FA category. Note that this  
759 analytical approach does not distinguish between isomers, which could influence the formal  
760 assignment of number of antennae in some cases.

### 761 **Rabbit immunization and sample collection**

762 The Institutional Animal Care and Use Committee (IACUC) guidelines were followed with animal  
763 subjects tested in the immunization study. Rabbit immunization and blood sampling were carried  
764 out under a subcontract at Covance (Denver, PA) following a previously described protocol (37).  
765 Three groups of female New Zealand White rabbits, four rabbits per group, were immunized  
766 intramuscularly with 30 µg of trimer or NP formulated in 250 µl of adjuvant AddaVax (InvivoGen)  
767 with a total volume of 500 µl, at weeks 0, 4, 12, 20, and 28. Blood samples, 15 ml each time, were



768 collected at day -10, weeks 1, 6, 14, 22, 28, and 30. Plasma was separated from blood and heat  
769 inactivated for ELISA binding and TZM-bl neutralization assays.

## 770 SUPPLEMENTARY MATERIALS

771 Supplementary material for this article is available at XXX.

772 **Fig. S1.** HIV-1 Env-specific sorting and NGS of mouse splenic B cells for antibody isolation

773 **Fig. S2.** Functional evaluation of NGS and single-cell-derived mouse mAbs.

774 **Fig. S3.** Structural characterization of the NGS-derived mouse NAb, M4H2K1.

775 **Fig. S4.** Rabbit plasma neutralization from two BG505 Env-immunized rabbit groups.

776 **Fig. S5.** Functional evaluation of single-cell sorted rabbit mAbs.

777 **Fig. S6.** HIV-1 Env-specific sorting and NGS of rabbit B cells for antibody isolation.

778 **Fig. S7.** Env structural comparison across multiple clade C isolates.

779 **Fig. S8.** Site-specific N-linked glycan analysis of Du172.17 SOSIP.664, HR1-redesigned

780 (gp140.664.R4), and UFO.664 trimers produced in HEK293F cells .

781 **Fig. S9.** Rabbit plasma neutralization from three non-BG505 Env-immunized rabbit groups.

782 **Fig. S10.** Longitudinal rabbit plasma neutralization from two clade C Du172.17 Env-immunized

783 rabbit groups.

784 **Table S1.** X-ray crystallographic data collection and refinement statistics.

## 785 REFERENCES

786

- 787 1. D. R. Burton, J. R. Mascola, Antibody responses to envelope glycoproteins in HIV-1  
788 infection. *Nat. Immunol.* **16**, 571-576 (2015).
- 789 2. P. D. Kwong, J. R. Mascola, HIV-1 vaccines based on antibody identification, B cell  
790 ontogeny, and epitope structure. *Immunity* **48**, 855-871 (2018).
- 791 3. D. Sok, D. R. Burton, Recent progress in broadly neutralizing antibodies to HIV. *Nat.*  
792 *Immunol.* **19**, 1179-1188 (2018).
- 793 4. C. K. Wibmer, P. L. Moore, L. Morris, HIV broadly neutralizing antibody targets. *Curr.*  
794 *Opin. HIV AIDS* **10**, 135-143 (2015).

- 795 5. P. L. Moore *et al.*, The C3-V4 region is a major target of autologous neutralizing  
796 antibodies in human immunodeficiency virus type 1 subtype C infection. *J. Virol.* **82**,  
797 1860-1869 (2008).
- 798 6. K. J. Bar *et al.*, Early low-titer neutralizing antibodies impede HIV-1 replication and  
799 select for virus escape. *PLoS Pathog.* **8**, e1002721 (2012).
- 800 7. P. L. Moore, E. S. Gray, L. Morris, Specificity of the autologous neutralizing antibody  
801 response. *Curr. Opin. HIV AIDS* **4**, 358-363 (2009).
- 802 8. P. L. Moore *et al.*, Limited neutralizing antibody specificities drive neutralization escape  
803 in early HIV-1 subtype C infection. *PLoS Pathog.* **5**, e1000598 (2009).
- 804 9. R. Andrabi, J. N. Bhiman, D. R. Burton, Strategies for a multi-stage neutralizing  
805 antibody-based HIV vaccine. *Curr. Opin. Immunol.* **53**, 143-151 (2018).
- 806 10. F. Klein *et al.*, Antibodies in HIV-1 vaccine development and therapy. *Science* **341**,  
807 1199-1204 (2013).
- 808 11. B. F. Haynes, G. Kelsoe, S. C. Harrison, T. B. Kepler, B-cell-lineage immunogen design  
809 in vaccine development with HIV-1 as a case study. *Nat. Biotechnol.* **30**, 423-433 (2012).
- 810 12. R. W. Sanders, J. P. Moore, Native-like Env trimers as a platform for HIV-1 vaccine  
811 design. *Immunol. Rev.* **275**, 161-182 (2017).
- 812 13. S. W. de Taeye, J. P. Moore, R. W. Sanders, HIV-1 envelope trimer design and  
813 immunization strategies to induce broadly neutralizing antibodies. *Trends Immunol.* **37**,  
814 221-232 (2016).
- 815 14. R. W. Sanders *et al.*, A next-generation cleaved, soluble HIV-1 Env trimer, BG505  
816 SOSIP.664 gp140, expresses multiple epitopes for broadly neutralizing but not non-  
817 neutralizing antibodies. *PLoS Pathog.* **9**, e1003618 (2013).
- 818 15. P. Pugach *et al.*, A native-like SOSIP.664 trimer based on an HIV-1 subtype B Env gene.  
819 *J. Virol.* **89**, 3380-3395 (2015).
- 820 16. J.-P. Julien *et al.*, Design and structure of two HIV-1 clade C SOSIP.664 trimers that  
821 increase the arsenal of native-like Env immunogens. *Proc. Natl. Acad. Sci. U. S. A.* **112**,  
822 11947-11952 (2015).
- 823 17. K. Sliepen *et al.*, Structure and immunogenicity of a stabilized HIV-1 envelope trimer  
824 based on a group-M consensus sequence. *Nat. Commun.* **10**, 2355 (2019).
- 825 18. S. K. Sharma *et al.*, Cleavage-independent HIV-1 Env trimers engineered as soluble  
826 native spike mimetics for vaccine design. *Cell Rep.* **11**, 539-550 (2015).
- 827 19. L. Kong *et al.*, Uncleaved prefusion-optimized gp140 trimers derived from analysis of  
828 HIV-1 envelope metastability. *Nat. Commun.* **7**, 12040 (2016).
- 829 20. A. B. Ward, I. A. Wilson, The HIV-1 envelope glycoprotein structure: nailing down a  
830 moving target. *Immunol. Rev.* **275**, 21-32 (2017).
- 831 21. G. Ozorowski *et al.*, Open and closed structures reveal allostery and pliability in the HIV-  
832 1 envelope spike. *Nature* **547**, 360-363 (2017).
- 833 22. D. Lyumkis *et al.*, Cryo-EM structure of a fully glycosylated soluble cleaved HIV-1  
834 envelope trimer. *Science* **342**, 1484-1490 (2013).
- 835 23. J.-P. Julien *et al.*, Crystal structure of a soluble cleaved HIV-1 envelope trimer. *Science*  
836 **342**, 1477-1483 (2013).
- 837 24. S. W. de Taeye *et al.*, Stabilization of the gp120 V3 loop through hydrophobic  
838 interactions reduces the immunodominant V3-directed non-neutralizing response to HIV-  
839 1 envelope trimers. *J. Biol. Chem.* **293**, 1688-1701 (2018).

- 840 25. J. T. Sullivan *et al.*, High-throughput protein engineering improves the antigenicity and  
841 stability of soluble HIV-1 envelope glycoprotein SOSIP trimers. *J. Virol.* **91**, e00862-  
842 00817 (2017).
- 843 26. R. P. Ringe *et al.*, Improving the expression and purification of soluble, recombinant  
844 native-like HIV-1 envelope glycoprotein trimers by targeted sequence changes. *J. Virol.*  
845 **91**, e00264-00217 (2017).
- 846 27. R. P. Ringe *et al.*, Reducing V3 antigenicity and immunogenicity on soluble, native-like  
847 HIV-1 Env SOSIP trimers. *J. Virol.* **91**, e00677-00617 (2017).
- 848 28. A. T. de la Pena *et al.*, Improving the immunogenicity of native-like HIV-1 envelope  
849 trimers by hyperstabilization. *Cell Rep.* **20**, 1805-1817 (2017).
- 850 29. S. W. de Taeye *et al.*, Immunogenicity of stabilized HIV-1 envelope trimers with reduced  
851 exposure of non-neutralizing epitopes. *Cell* **163**, 1702-1715 (2015).
- 852 30. V. Dubrovskaya *et al.*, Vaccination with glycan-modified HIV NFL envelope trimer-  
853 liposomes elicits broadly neutralizing antibodies to multiple sites of vulnerability.  
854 *Immunity* **51**, 915-929.e917 (2019).
- 855 31. J. Guenaga *et al.*, Glycine substitution at helix-to-coil transitions facilitates the structural  
856 determination of a stabilized subtype C HIV envelope glycoprotein. *Immunity* **46**, 792-  
857 803 (2017).
- 858 32. J. Guenaga *et al.*, Structure-guided redesign increases the propensity of HIV Env to  
859 generate highly stable soluble trimers. *J. Virol.* **90**, 2806-2817 (2015).
- 860 33. G. Y. Chuang *et al.*, Structure-based design of a soluble prefusion-closed HIV-1 Env  
861 trimer with reduced CD4 affinity and improved immunogenicity. *J. Virol.* **91**, e02268-  
862 02216 (2017).
- 863 34. M. G. Joyce *et al.*, Soluble prefusion closed DS-SOSIP.664-Env trimers of diverse HIV-1  
864 strains. *Cell Rep.* **21**, 2992-3002 (2017).
- 865 35. D. W. Kulp *et al.*, Structure-based design of native-like HIV-1 envelope trimers to  
866 silence non-neutralizing epitopes and eliminate CD4 binding. *Nat. Commun.* **8**, 1655  
867 (2017).
- 868 36. P. Zhang *et al.*, Interdomain stabilization impairs CD4 binding and improves  
869 immunogenicity of the HIV-1 envelope trimer. *Cell Host Microbe* **23**, 832-844.e836  
870 (2018).
- 871 37. L. L. He *et al.*, HIV-1 vaccine design through minimizing envelope metastability. *Sci.*  
872 *Adv.* **4**, eaau6769 (2018).
- 873 38. K. Sliepen *et al.*, Presenting native-like HIV-1 envelope trimers on ferritin nanoparticles  
874 improves their immunogenicity. *Retrovirology* **12**, 82 (2015).
- 875 39. A. Antanasijevic *et al.*, Structural and functional evaluation of de novo-designed, two-  
876 component nanoparticle carriers for HIV Env trimer immunogens. *PLoS Pathog.* **16**,  
877 e1008665 (2020).
- 878 40. P. J. M. Brouwer *et al.*, Enhancing and shaping the immunogenicity of native-like HIV-1  
879 envelope trimers with a two-component protein nanoparticle. *Nat. Commun.* **10**, 4272  
880 (2019).
- 881 41. L. He *et al.*, Presenting native-like trimeric HIV-1 antigens with self-assembling  
882 nanoparticles. *Nat. Commun.* **7**, 12041 (2016).
- 883 42. P. Martinez-Murillo *et al.*, Particulate array of well-ordered HIV clade C Env trimers  
884 elicits neutralizing antibodies that display a unique V2 cap approach. *Immunity* **46**, 804-  
885 817 (2017).

- 886 43. J. Ingale *et al.*, High-density array of well-ordered HIV-1 spikes on synthetic liposomal  
887 nanoparticles efficiently activate B cells. *Cell Rep.* **15**, 1986-1999 (2016).
- 888 44. R. P. Ringe *et al.*, Neutralizing antibody induction by HIV-1 envelope glycoprotein  
889 SOSIP trimers on iron oxide nanoparticles may be impaired by mannose binding lectin. *J.*  
890 *Virol.* **94**, e01883-01819 (2020).
- 891 45. J. K. Hu *et al.*, Murine antibody responses to cleaved soluble HIV-1 envelope trimers are  
892 highly restricted in specificity. *J. Virol.* **89**, 10383-10398 (2015).
- 893 46. A. Escolano *et al.*, Immunization expands B cells specific to HIV-1 V3 glycan in mice  
894 and macaques. *Nature* **570**, 468–473 (2019).
- 895 47. K. Xu *et al.*, Epitope-based vaccine design yields fusion peptide-directed antibodies that  
896 neutralize diverse strains of HIV-1. *Nat. Med.* **24**, 857–867 (2018).
- 897 48. J. M. Steichen *et al.*, HIV vaccine design to target germline precursors of glycan-  
898 dependent broadly neutralizing antibodies. *Immunity* **45**, 483-496 (2016).
- 899 49. A. T. McGuire *et al.*, Specifically modified Env immunogens activate B-cell precursors  
900 of broadly neutralizing HIV-1 antibodies in transgenic mice. *Nat. Commun.* **7**, 10618  
901 (2016).
- 902 50. A. Escolano *et al.*, Sequential immunization elicits broadly neutralizing anti-HIV-1  
903 antibodies in Ig knockin mice. *Cell* **166**, 1445-1458.e1412 (2016).
- 904 51. R. W. Sanders *et al.*, HIV-1 neutralizing antibodies induced by native-like envelope  
905 trimers. *Science* **349**, aac4223 (2015).
- 906 52. K. O. Saunders *et al.*, Vaccine induction of heterologous tier 2 HIV-1 neutralizing  
907 antibodies in animal models. *Cell Rep.* **21**, 3681-3690 (2017).
- 908 53. A. T. de la Pena *et al.*, Immunogenicity in rabbits of HIV-1 SOSIP trimers from clades A,  
909 B, and C, given individually, sequentially, or in combination. *J. Virol.* **92**, e01957-01917  
910 (2018).
- 911 54. E. T. Crooks *et al.*, Vaccine-elicited tier 2 HIV-1 neutralizing antibodies bind to  
912 quaternary epitopes involving glycan-deficient patches proximal to the CD4 binding site.  
913 *PLoS Pathog.* **11**, e1004932 (2015).
- 914 55. L. E. McCoy *et al.*, Holes in the glycan shield of the native HIV envelope are a target of  
915 trimer-elicited neutralizing antibodies. *Cell Rep.* **16**, 2327-2338 (2016).
- 916 56. J. E. Voss *et al.*, Elicitation of neutralizing antibodies targeting the V2 apex of the HIV  
917 envelope trimer in a wild-type animal model. *Cell Rep.* **21**, 222-235 (2017).
- 918 57. R. P. Ringe *et al.*, Closing and opening holes in the glycan shield of HIV-1 envelope  
919 glycoprotein SOSIP trimers can redirect the neutralizing antibody response to the newly  
920 unmasked epitopes. *J. Virol.* **93**, e01656-01618 (2019).
- 921 58. P. J. Klasse *et al.*, Sequential and simultaneous immunization of rabbits with HIV-1  
922 envelope glycoprotein SOSIP.664 trimers from clades A, B and C. *PLoS Pathog.* **12**,  
923 e1005864 (2016).
- 924 59. P. J. Klasse *et al.*, Epitopes for neutralizing antibodies induced by HIV-1 envelope  
925 glycoprotein BG505 SOSIP trimers in rabbits and macaques. *PLoS Pathog.* **14**, e1006913  
926 (2018).
- 927 60. S. Bale *et al.*, Cleavage-independent HIV-1 trimers from CHO cell lines elicit robust  
928 autologous tier 2 neutralizing antibodies. *Front. Immunol.* **9**, 1116 (2018).
- 929 61. M. Bianchi *et al.*, Electron-microscopy-based epitope mapping defines specificities of  
930 polyclonal antibodies elicited during HIV-1 BG505 envelope trimer immunization.  
931 *Immunity* **49**, 288-300.e288 (2018).

- 932 62. T. Q. Zhou *et al.*, Quantification of the impact of the HIV-1-glycan shield on antibody  
933 elicitation. *Cell Rep.* **19**, 719-732 (2017).
- 934 63. M. Pauthner *et al.*, Elicitation of robust tier 2 neutralizing antibody responses in  
935 nonhuman primates by HIV envelope trimer immunization using optimized approaches.  
936 *Immunity* **46**, 1073-1088 (2017).
- 937 64. G. E. Phad *et al.*, Extensive dissemination and intraclonal maturation of HIV Env  
938 vaccine-induced B cell responses. *J. Exp. Med.* **217**, e20191155 (2020).
- 939 65. C. A. Cottrell *et al.*, Mapping the immunogenic landscape of near-native HIV-1 envelope  
940 trimers in non-human primates. *PLoS Pathog.* **16**, e1008753 (2020).
- 941 66. F. Z. Zhao *et al.*, Mapping neutralizing antibody epitope specificities to an HIV Env  
942 trimer in immunized and in infected rhesus macaques. *Cell Rep.* **32**, 108122 (2020).
- 943 67. L. L. He *et al.*, Hidden lineage complexity of glycan-dependent HIV-1 broadly  
944 neutralizing antibodies uncovered by digital panning and native-like gp140 trimer. *Front.*  
945 *Immunol.* **8**, 1025 (2017).
- 946 68. S. Kumar *et al.*, A V<sub>H</sub>1-69 antibody lineage from an infected Chinese donor potently  
947 neutralizes HIV-1 by targeting the V3 glycan supersite. *Sci. Adv.* **6**, eabb1328 (2020).
- 948 69. C. D. Morris *et al.*, Differential antibody responses to conserved HIV-1 neutralizing  
949 epitopes in the context of multivalent scaffolds and native-like gp140 trimers. *mBio* **8**,  
950 e00036-00017 (2017).
- 951 70. L. Kong *et al.*, Key gp120 glycans pose roadblocks to the rapid development of VRC01-  
952 class antibodies in an HIV-1-infected Chinese donor. *Immunity* **44**, 939-950 (2016).
- 953 71. A. deCamp *et al.*, Global panel of HIV-1 Env reference strains for standardized  
954 assessments of vaccine-elicited neutralizing antibodies. *J. Virol.* **88**, 2489-2507 (2014).
- 955 72. M. Pancera *et al.*, Structure and immune recognition of trimeric pre-fusion HIV-1 Env.  
956 *Nature* **514**, 455-461 (2014).
- 957 73. T. Zhou *et al.*, Structural basis for broad and potent neutralization of HIV-1 by antibody  
958 VRC01. *Science* **329**, 811-817 (2010).
- 959 74. G. E. Seabright *et al.*, Networks of HIV-1 envelope glycans maintain antibody epitopes  
960 in the face of glycan additions and deletions. *Structure* **28**, 897-909.e896 (2020).
- 961 75. L. Kong *et al.*, Supersite of immune vulnerability on the glycosylated face of HIV-1  
962 envelope glycoprotein gp120. *Nat. Struct. Mol. Biol.* **20**, 796-803 (2013).
- 963 76. L. Scharf *et al.*, Broadly neutralizing antibody 8ANC195 recognizes closed and open  
964 states of HIV-1 Env. *Cell* **162**, 1379-1390 (2015).
- 965 77. P. D. Kwong *et al.*, Structure of an HIV gp120 envelope glycoprotein in complex with  
966 the CD4 receptor and a neutralizing human antibody. *Nature* **393**, 648-659 (1998).
- 967 78. F. Garces *et al.*, Affinity maturation of a potent family of HIV antibodies is primarily  
968 focused on accommodating or avoiding glycans. *Immunity* **43**, 1053-1063 (2015).
- 969 79. R. Henderson *et al.*, Disruption of the HIV-1 envelope allosteric network blocks CD4-  
970 induced rearrangements. *Nat. Commun.* **11**, 520 (2020).
- 971 80. H. B. Gristick *et al.*, Natively glycosylated HIV-1 Env structure reveals new mode for  
972 antibody recognition of the CD4-binding site. *Nat. Struct. Mol. Biol.* **23**, 906-915 (2016).
- 973 81. L. Lei *et al.*, The HIV-1 envelope glycoprotein C3/V4 region defines a prevalent  
974 neutralization epitope following immunization. *Cell Rep.* **27**, 586-598.e586 (2019).
- 975 82. J. S. Gach *et al.*, Antibody responses elicited by immunization with BG505 trimer  
976 immune complexes. *J. Virol.* **93**, e01188-01119 (2019).



- 977 83. Y. H. R. Yang *et al.*, Autologous antibody responses to an HIV envelope glycan hole are  
978 not easily broadened in rabbits. *J. Virol.* **94**, e01861-01819 (2020).
- 979 84. J. J. Lavinder, K. H. Hoi, S. T. Reddy, Y. Wine, G. Georgiou, Systematic  
980 characterization and comparative analysis of the rabbit immunoglobulin repertoire. *PLoS*  
981 *One* **9**, e101322 (2014).
- 982 85. J. Hemelaar, E. Gouws, P. D. Ghys, S. Osmanov, W.-U. N. H. I. C, Global trends in  
983 molecular epidemiology of HIV-1 during 2000-2007. *AIDS* **25**, 679-689 (2011).
- 984 86. S. Kumar *et al.*, Capturing the inherent structural dynamics of the HIV-1 envelope  
985 glycoprotein fusion peptide. *Nat. Commun.* **10**, 763 (2019).
- 986 87. A. J. Borst *et al.*, Germline VRC01 antibody recognition of a modified clade C HIV-1  
987 envelope trimer and a glycosylated HIV-1 gp120 core. *eLife* **7**, e37688 (2018).
- 988 88. K. O. Saunders *et al.*, Targeted selection of HIV-specific antibody mutations by  
989 engineering B cell maturation. *Science* **366**, eaay7199 (2019).
- 990 89. J. R. Mascola, The modern era of HIV-1 vaccine development. *Science* **349**, 139-140  
991 (2015).
- 992 90. P. J. Klasse, G. Ozorowski, R. W. Sanders, J. P. Moore, Env exceptionalism: why are  
993 HIV-1 Env glycoproteins atypical immunogens? *Cell Host Microbe* **27**, 507-518 (2020).
- 994 91. T. J. Moyer *et al.*, Engineered immunogen binding to alum adjuvant enhances humoral  
995 immunity. *Nat. Med.* **26**, 430-440 (2020).
- 996 92. Y. Kato *et al.*, Multifaceted effects of antigen valency on B cell response composition  
997 and differentiation in vivo. *Immunity* **53**, 548-563.e548 (2020).
- 998 93. T. Tokatlian *et al.*, Enhancing humoral responses against HIV envelope trimers via  
999 nanoparticle delivery with stabilized synthetic liposomes. *Sci. Rep.* **8**, 16527 (2018).
- 1000 94. L. He *et al.*, Self-assembling nanoparticles presenting receptor binding domain and  
1001 stabilized spike as next-generation COVID-19 vaccines. *bioRxiv*,  
1002 2020.2009.2014.296715 (2020).
- 1003 95. L. He *et al.*, Single-component multilayered self-assembling nanoparticles presenting  
1004 rationally designed glycoprotein trimers as Ebola virus vaccines. *bioRxiv*,  
1005 2020.2008.2022.262634 (2020).
- 1006 96. R. Veneziano *et al.*, Role of nanoscale antigen organization on B-cell activation probed  
1007 using DNA origami. *Nat. Nanotechnol.* **15**, 716-723 (2020).
- 1008 97. L. L. He *et al.*, Proof of concept for rational design of hepatitis C virus E2 core  
1009 nanoparticle vaccines. *Sci. Adv.* **6**, eaaz6225 (2020).
- 1010 98. Y.-N. Zhang *et al.*, Nanoparticle size influences antigen retention and presentation in  
1011 lymph node follicles for humoral immunity. *Nano Letters* **19**, 7226-7235 (2019).
- 1012 99. R. Kong *et al.*, Fusion peptide of HIV-1 as a site of vulnerability to neutralizing antibody.  
1013 *Science* **352**, 828-833 (2016).
- 1014 100. L. M. Walker *et al.*, Broad neutralization coverage of HIV by multiple highly potent  
1015 antibodies. *Nature* **477**, 466-470 (2011).
- 1016 101. T. Tiller, C. E. Busse, H. Wardemann, Cloning and expression of murine Ig genes from  
1017 single B cells. *J. Immunol. Methods* **350**, 183-193 (2009).
- 1018 102. M. Sarzotti-Kelsoe *et al.*, Optimization and validation of the TZM-bl assay for  
1019 standardized assessments of neutralizing antibodies against HIV-1. *J. Immunol. Methods*  
1020 **409**, 131-146 (2014).
- 1021 103. M.-A. Elsliger *et al.*, The JCSG high-throughput structural biology pipeline. *Acta*  
1022 *Crystallogr. Sect. F Struct. Biol. Cryst. Commun.* **66**, 1137-1142 (2010).

- 1023 104. Z. Otwinowski, W. Minor, Processing of X-ray diffraction data collected in oscillation  
1024 mode. *Methods Enzymol.* **276**, 307-326 (1997).
- 1025 105. A. J. McCoy *et al.*, Phaser crystallographic software. *J. Appl. Crystallogr.* **40**, 658-674  
1026 (2007).
- 1027 106. J. H. Kim *et al.*, Crystal structures of mono- and bi-specific diabodies and reduction of  
1028 their structural flexibility by introduction of disulfide bridges at the Fv interface. *Sci. Rep.*  
1029 **6**, 34515 (2016).
- 1030 107. D. T. MacLeod *et al.*, Early antibody lineage diversification and independent limb  
1031 maturation lead to broad HIV-1 neutralization targeting the Env high-mannose patch.  
1032 *Immunity* **44**, 1215-1226 (2016).
- 1033 108. S. Ding *et al.*, A new family of small-molecule CD4-mimetic compounds contacts highly  
1034 conserved aspartic acid 368 of HIV-1 gp120 and mediates antibody-dependent cellular  
1035 cytotoxicity. *J. Virol.* **93**, e01325-01319 (2019).
- 1036 109. J. Huang *et al.*, Broad and potent HIV-1 neutralization by a human antibody that binds  
1037 the gp41–gp120 interface. *Nature* **515**, 138-142 (2014).
- 1038 110. F. Garces *et al.*, Structural evolution of glycan recognition by a family of potent HIV  
1039 antibodies. *Cell* **159**, 69-79 (2014).
- 1040 111. P. D. Adams *et al.*, Recent developments in the PHENIX software for automated  
1041 crystallographic structure determination. *J. Synchrotron Radiat.* **11**, 53-55 (2004).
- 1042 112. P. Emsley, K. Cowtan, Coot: model-building tools for molecular graphics. *Acta*  
1043 *Crystallogr. D Biol. Crystallogr.* **60**, 2126-2132 (2004).
- 1044 113. P. Emsley, M. Crispin, Structural analysis of glycoproteins: building N-linked glycans  
1045 with Coot. *Acta Crystallogr. D Biol. Crystallogr.* **74**, 256-263 (2018).
- 1046 114. V. B. Chen *et al.*, MolProbity: all-atom structure validation for macromolecular  
1047 crystallography. *Acta Crystallogr. D Biol. Crystallogr.* **66**, 12-21 (2010).
- 1048 115. A. C. R. Martin, Accessing the Kabat antibody sequence database by computer. *Proteins*  
1049 **25**, 130-133 (1996).
- 1050 116. L. Ratner *et al.*, Complete nucleotide sequences of functional clones of the AIDS virus.  
1051 *AIDS Res. Hum. Retroviruses* **3**, 57-69 (1987).
- 1052 117. T. Lutteke, C. W. von der Lieth, pdb-care (PDB carbohydrate residue check): a program  
1053 to support annotation of complex carbohydrate structures in PDB files. *BMC*  
1054 *Bioinformatics* **5**, 69 (2004).
- 1055 118. J. Agirre, Strategies for carbohydrate model building, refinement and validation. *Acta*  
1056 *Crystallogr. D Struct. Biol.* **73**, 171-186 (2017).
- 1057 119. C. Suloway *et al.*, Automated molecular microscopy: The new Legimon system. *J. Struct.*  
1058 *Biol.* **151**, 41-60 (2005).
- 1059 120. G. C. Lander *et al.*, Appion: An integrated, database-driven pipeline to facilitate EM  
1060 image processing. *J. Struct. Biol.* **166**, 95-102 (2009).
- 1061 121. J. Zivanov *et al.*, New tools for automated high-resolution cryo-EM structure  
1062 determination in RELION-3. *eLife* **7**, e42166 (2018).
- 1063 122. A. Punjani, J. L. Rubinstein, D. J. Fleet, M. A. Brubaker, cryoSPARC: algorithms for  
1064 rapid unsupervised cryo-EM structure determination. *Nature Methods* **14**, 290–296  
1065 (2017).
- 1066
- 1067



1068 **Acknowledgments:** We thank Y. Hua, H. Tien, R. Stanfield, and Drs. X. Dai, and M. Elsliger  
1069 for excellent technical help; Diffraction data were collected at the Advanced Photon Source  
1070 (APS) beamline 23-IDD, and Stanford Synchrotron Radiation Lightsource (SSRL) beamline  
1071 12-2. Use of the APS was supported by the DOE, Basic Energy Sciences, Office of Science,  
1072 under contract no. DE-AC02-06CH11357. Use of the SSRL was supported by the US  
1073 Department of Energy, Basic Energy Sciences, Office of Science, under contract no. DE-AC02-  
1074 76SF00515. **Funding:** This work was supported by the International AIDS Vaccine Initiative  
1075 (IAVI) through grant INV-008352/OPP1153692 (M.C.) and the IAVI Neutralizing Antibody  
1076 Center through the Collaboration for AIDS Vaccine Discovery grant OPP1196345/INV-008813  
1077 (I.A.W, A.B.W and M.C.), both funded by the Bill and Melinda Gates Foundation; Scripps  
1078 Consortium for HIV/AIDS Vaccine Development (CHAVD 1UM1 AI144462) (M.C., A.B.W.  
1079 and I.A.W.); HIV Vaccine Research and Design (HIVRAD) program (P01 AI124337) (J.Z.); NIH  
1080 Grants R01 AI129698 (J.Z.) and R01 AI140844 (J.Z.). **Author contributions:** Project design by  
1081 S.K., X.L., I.A.W. and J.Z.; NGS, bioinformatics, antibody selection, and synthesis by X.L.,  
1082 L.H., C.S., and J.Z.; B cell sorting and antibody cloning by C.S., L.Z., and L.H.; antibody  
1083 expression, purification, and ELISA by X.L., B.S., and T.N.; plasma and antibody neutralization  
1084 by X.L., B.S., T.N., and L.H.; nsEM analysis by J.C., G.O., and A.B.W.; glycan analysis by J.D.A.,  
1085 and M.C.; Env expression and purification by S.K., X.L., and B.S.; x-ray crystallography by  
1086 S.K. and I.A.W.; Manuscript written by S.K., L.X., I.A.W., and J.Z. All authors were asked to  
1087 comment on the manuscript. The TSRI manuscript number is 30047. **Competing interests:** The  
1088 authors declare that they have no competing interests. **Data and materials availability:** All data  
1089 and code to understand and assess the conclusions of this research are available in the main text,

1090 Supplementary Materials, PDB (accession codes 7KLC, 7KKZ and 7KMD) and EMDB (accession  
1091 code EMD-22999). Additional data related to this paper may be requested from the authors.

## 1092 **Figure Legends**

1093 **Fig. 1. Tier 2 neutralizing antibodies isolated from gp140 nanoparticle-immunized mice. (A)**

1094 Schematic representation depicting mouse immunization with BG505 gp140.664.R1-PADRE-I3-

1095 01 nanoparticle and antibody isolation from mouse splenic B cells using two approaches: Env-

1096 specific bulk B cell sorting followed by next-generation sequencing (NGS) and Env-specific single

1097 B cell sorting combined with antibody cloning. **(B)** Quantitative B cell repertoire profiles derived

1098 from the NGS analysis of Env-specific splenic B cells from four mice in the I3-01 group, including

1099 germline gene usage, degree of somatic hypermutation (SHM), and CDR3 loop length. **(C)**

1100 Characteristics of antibody heavy and  $\kappa$ -light chains (HC and KC) identified from clustering

1101 analysis of mouse NGS data and from single B cell sorting and antibody cloning. **(D)** Divergence-

1102 identity analysis of murine NAbs in the context of Env-specific splenic B cells from mouse #4

1103 (M4). HCs and KCs are plotted as a function of sequence identity to the template and sequence

1104 divergence from putative germline genes. Color-coding denotes sequence density. The template

1105 and sequences identified based on the CDR3 identity of 95% or greater to the template are shown

1106 as black and orange dots on the plots, with the number of related sequences labeled accordingly.

1107 **(E)** ELISA binding of mouse NAbs to the BG505 UFO.664 trimer and BG505 gp120-ferritin (FR)

1108 nanoparticle probe with  $EC_{50}$  values labeled next to the binding curves. **(F)** Percent neutralization

1109 of mouse NAbs against autologous tier 2 clade A BG505.TN332N and heterologous tier 1 clade

1110 B SF162 pseudoviruses with  $IC_{50}$  values labeled next to the neutralization curves. Five mouse

1111 NAbs including M4H2K1 (blue), M4-Ab3 (green), M4-Ab9 (orange), M1H2K1 (red), and

1112 M1H3K3 (purple) are shown in **(E)** and **(F)**.

1113 **Fig. 2. Structural epitope mapping of M4H2K1 on HIV-1 Env.** (A) 3D EM reconstruction of  
1114 M4H2K1 Fab/BG505 UFO.664 complex. The crystal structure of BG505 SOSIP.664 trimer (PDB  
1115 ID: 4TVP) is docked into the trimer EM density and displayed in blue ribbons. Comparison of the  
1116 mode of M4H2K1 Fab binding to BG505 UFO.664 trimer with four bNAbs, VRC01 (red; EMD-  
1117 6252), 2G12 (purple; EMD-5982), PGT135 (cyan; EMD-2331), and 8ANC195 (orange; EMD-  
1118 2625). (B) Crystal structure of BG505 gp120 core (pink) in complex with Fabs 17b (yellow) and  
1119 M4H2K1 at 4.3Å resolution. (C) Side view of the crystal structure of the M4H2K1 Fab-BG505  
1120 gp120 core (light pink) complex superimposed onto one protomer of BG505 gp140 (grey) (PDB  
1121 ID: 5CEZ). The M4H2K1 Fab is shown with the HCDR loops labeled and colored [H1 (orange),  
1122 H2 (pink), and H3 (yellow)] and LCDR loops [L1 (cyan), L2 (blue), and L3 (green)]. (D) Epitope  
1123 of M4H2K1 Fab mapped onto the BG505 gp120 core shown in surface representation and defined  
1124 as two residues containing an atom within 4.0Å of each other (C2: green; C3: brown; V4: cyan;  
1125 and V5: pink). The M4H2K1 Fab is shown with HCDR and LCDR loops labeled and colored  
1126 accordingly. (E) Left: hydrogen bonds are shown between HCDR loops (H3:yellow; H2:pink; and  
1127 H1:orange) and gp120 core (C3:brown; and V5:pink) and right, table showing residues involved  
1128 in hydrogen-bond (HB) interaction and distance were measured in Å. (F) Percent neutralization of  
1129 mouse NAbs against nine BG505 mutant pseudoviruses with IC<sub>50</sub> values labeled next to the  
1130 neutralization curves. NAbs M4H2K1 (blue), M4-Ab3 (green), M4-Ab9 (orange), and M1H2K1  
1131 (red) are shown.

1132 **Fig. 3. Tier-2 neutralizing antibodies isolated from rabbits immunized with HR1-redesigned**  
1133 **BG505 gp140 trimer and its ferritin nanoparticle.** (A) Schematic representation depicting rabbit  
1134 immunization with the BG505-gp140.664.R1 trimer and ferritin (FR) nanoparticle and antibody  
1135 isolation from rabbit PBMCs by Env-specific single B cell sorting coupled with antibody cloning.

1136 **(B)** Neutralization (measured by ID<sub>50</sub> values) of week-30 plasma from two rabbit groups against  
1137 autologous tier 2 clade A BG505.T332N, tier 1 clade B SF162, and a 12-virus global panel with  
1138 MLV included as a negative control. Color coding indicates neutralization potency (red: potent;  
1139 green neutralizing but not potent; no color: non-neutralizing). **(C)** Left: ELISA binding of rabbit  
1140 NAbs to the BG505 UFO.664 trimer and BG505 gp120-FR nanoparticle probe with EC<sub>50</sub> values  
1141 labeled next to the ELISA curves; Right: Percent neutralization of rabbit NAbs against autologous  
1142 tie 2 clade A BG505.TN332N and heterologous tier 1 clade B SF162 pseudoviruses with IC<sub>50</sub>  
1143 values labeled next to the neutralization curves. Antibodies were diluted to 10µg/ml and subjected  
1144 to a 3-fold dilution series in the TZM-bl assay. **(D)** Divergence-identity analysis of rabbit mAbs  
1145 in the context of Env-specific rabbit B cell repertoires from rabbits RB35 and RB63. HC and KC  
1146 sequences are plotted as a function of sequence identity to the template and sequence divergence  
1147 from putative germline genes. Color-coding denotes sequence density. Templates and sequences  
1148 identified based on the CDR3 identity cutoffs of 95% and 90% are shown as pink and light pink  
1149 dots on the plots with the number of sequences labeled accordingly. **(E)**. Percent neutralization of  
1150 rabbit NAbs against four BG505 pseudovirus containing glycan hole mutations with IC<sub>50</sub> values  
1151 labeled next to the neutralization curves. NAbs RB35-1B11 (red), RB63-1E7 (green), and RB63-  
1152 4B5 (blue) are shown in **(C)** and **(E)**. **(F)** % neutralization of rabbit plasma against BG505.T332N  
1153 and its three glycan hole mutants. Color coding in the table indicates percent reduction with respect  
1154 to the % neutralization value obtained for BG505.T332N, <25% (green), 25-50% (yellow), 50-  
1155 75% (orange) and >75% (red).

1156 **Fig. 4. Structural and in vivo characterization of tier-2 clade-C Du172.17 T/F Env.** (A) Crystal  
1157 structure of closed prefusion structure of Du172.17 gp140.664.R4 Env trimer, which is uncleaved  
1158 and contains a computationally redesigned HR1 (HR1-#4, see ref. 19) . Top view of the Du172.17

1159 Env-Fab complex along the trimer axis with gp120 in blue and gp41 in pink. Side view of the  
1160 Du172.17 Env protomer bound to the PGT124 (orange) and 35O22 (dark gray) Fabs from the 3.4  
1161 Å resolution crystal structure. The cartoon representation is overlaid with the transparent molecular  
1162 surface. **(B)** Sequence and structural alignment of the N-terminus of HR1 region (HR1<sub>N</sub>) in two  
1163 trimer designs, BG505 gp140.664.R1 and Du172.17 gp140.664.R4. The redesigned 8-residue HR1  
1164 region is highlighted to facilitate comparison. **(C)** Superimposition of cleaved Du172.17  
1165 gp140.664.R4 (pink), cleaved BG505 SOSIP.664 (orange; PDB ID: 5CEZ), cleaved B41  
1166 SOSIP.664 (green; PDB ID: 6MDT) and uncleaved 16055 NFL.664 (cyan; PDB ID: 6P65)  
1167 protomers. The inset on the right shows a close-up view of Du172.17 HR1<sub>N</sub> superimposed onto  
1168 HR1<sub>N</sub> from each of the three Envs. **(D)** Neutralization (measured by ID<sub>50</sub> values) of week-30  
1169 plasma from three rabbit groups against two respective autologous viruses (Du172.17 and Q842-  
1170 d12), tier 2 clade A BG505.T332N, tier 1 clade B SF162, and a 12-virus global panel with MLV  
1171 included as a negative control. Color coding indicates neutralization potency (red: potent; green  
1172 neutralizing but not potent; no color: non-neutralizing). **(E)** Longitudinal analysis of plasma from  
1173 two rabbit groups immunized with Du172.17 trimer and FR nanoparticle at six time points against  
1174 tier 1 clade B SF162 (left) and tier 2 clade A p398F1 (right). Rabbits from the trimer and FR groups  
1175 are shown as red and green lines, respectively.

# Figure 1

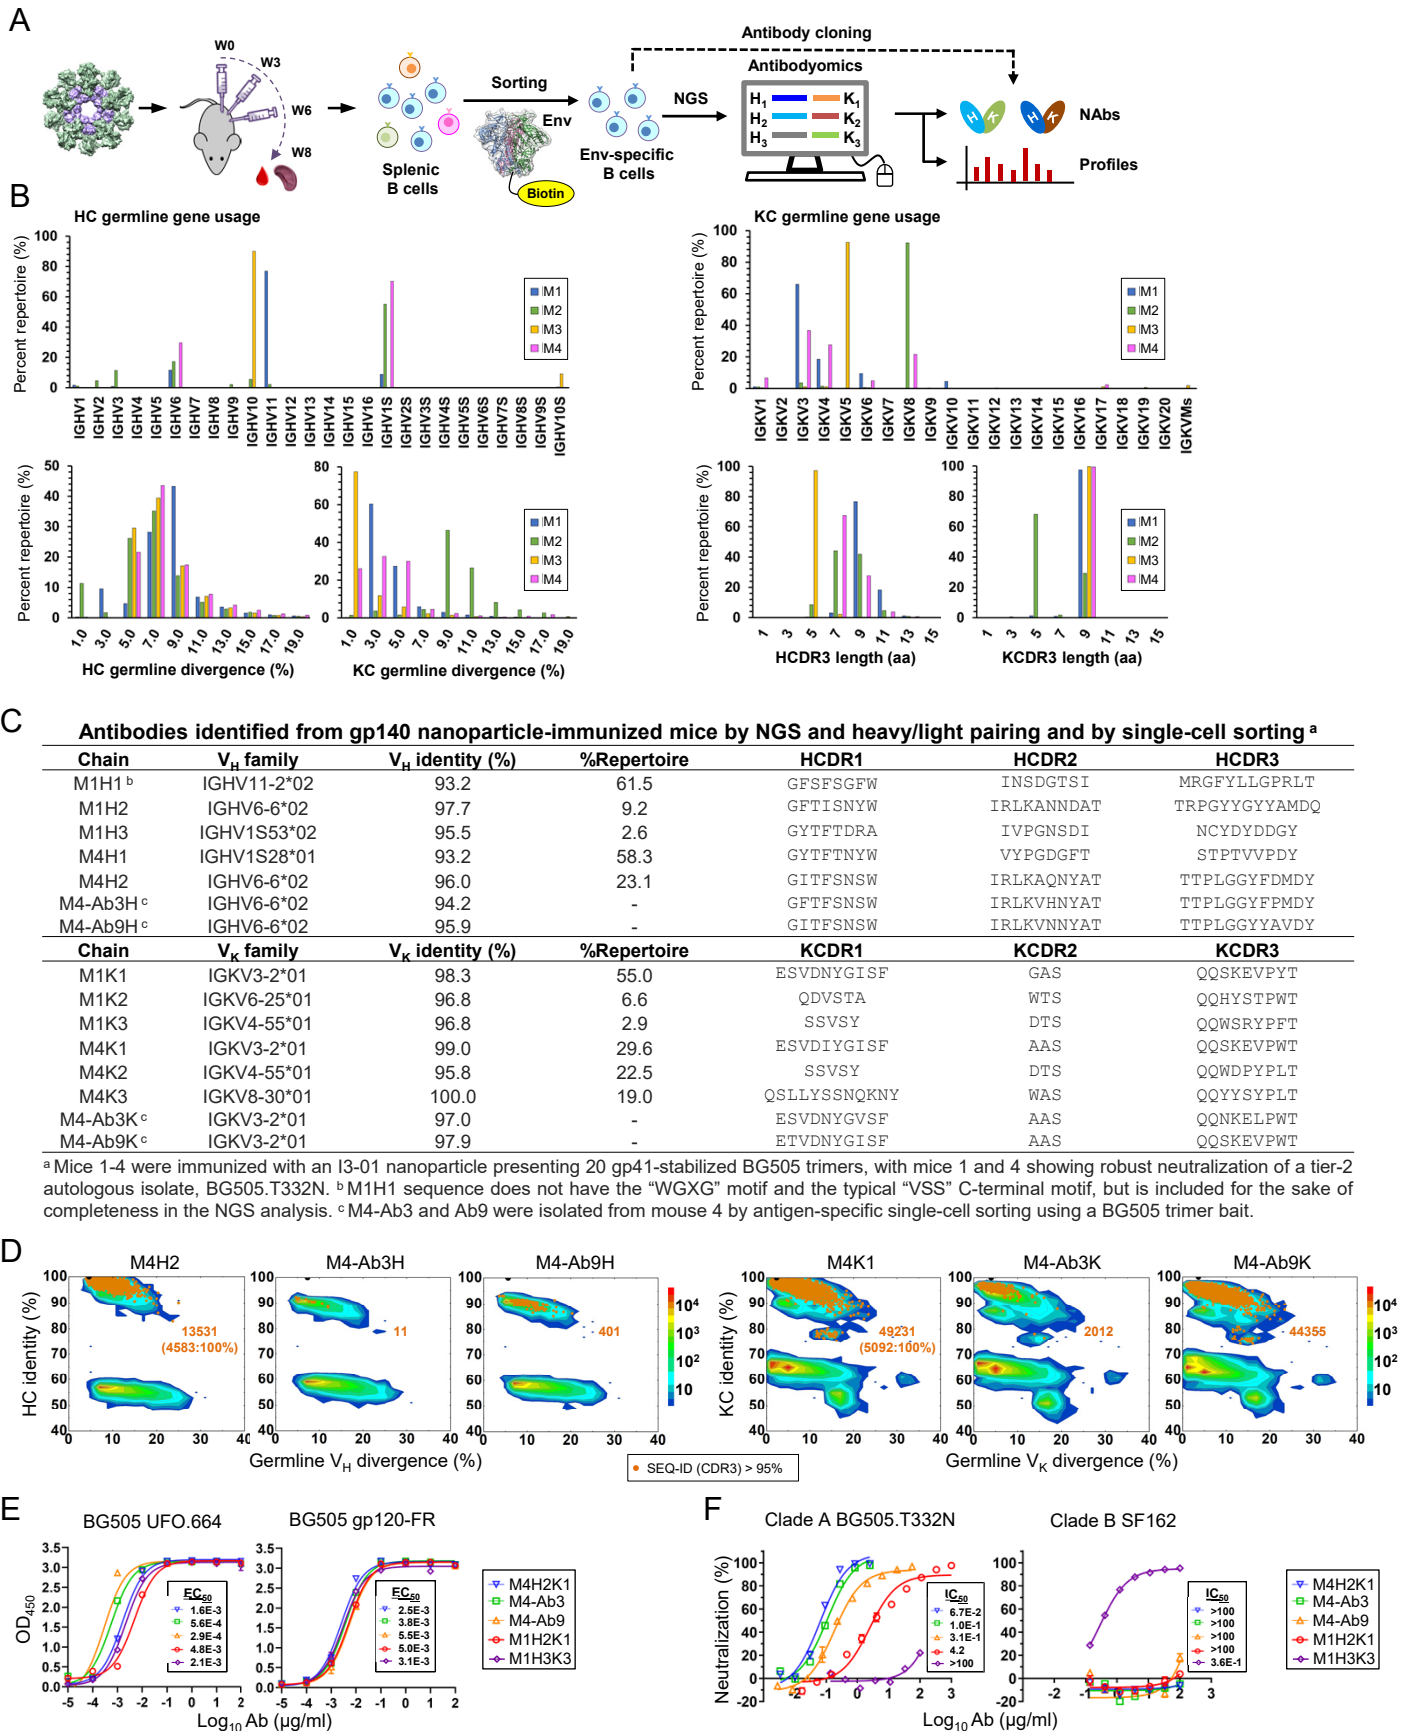



## Figure 2

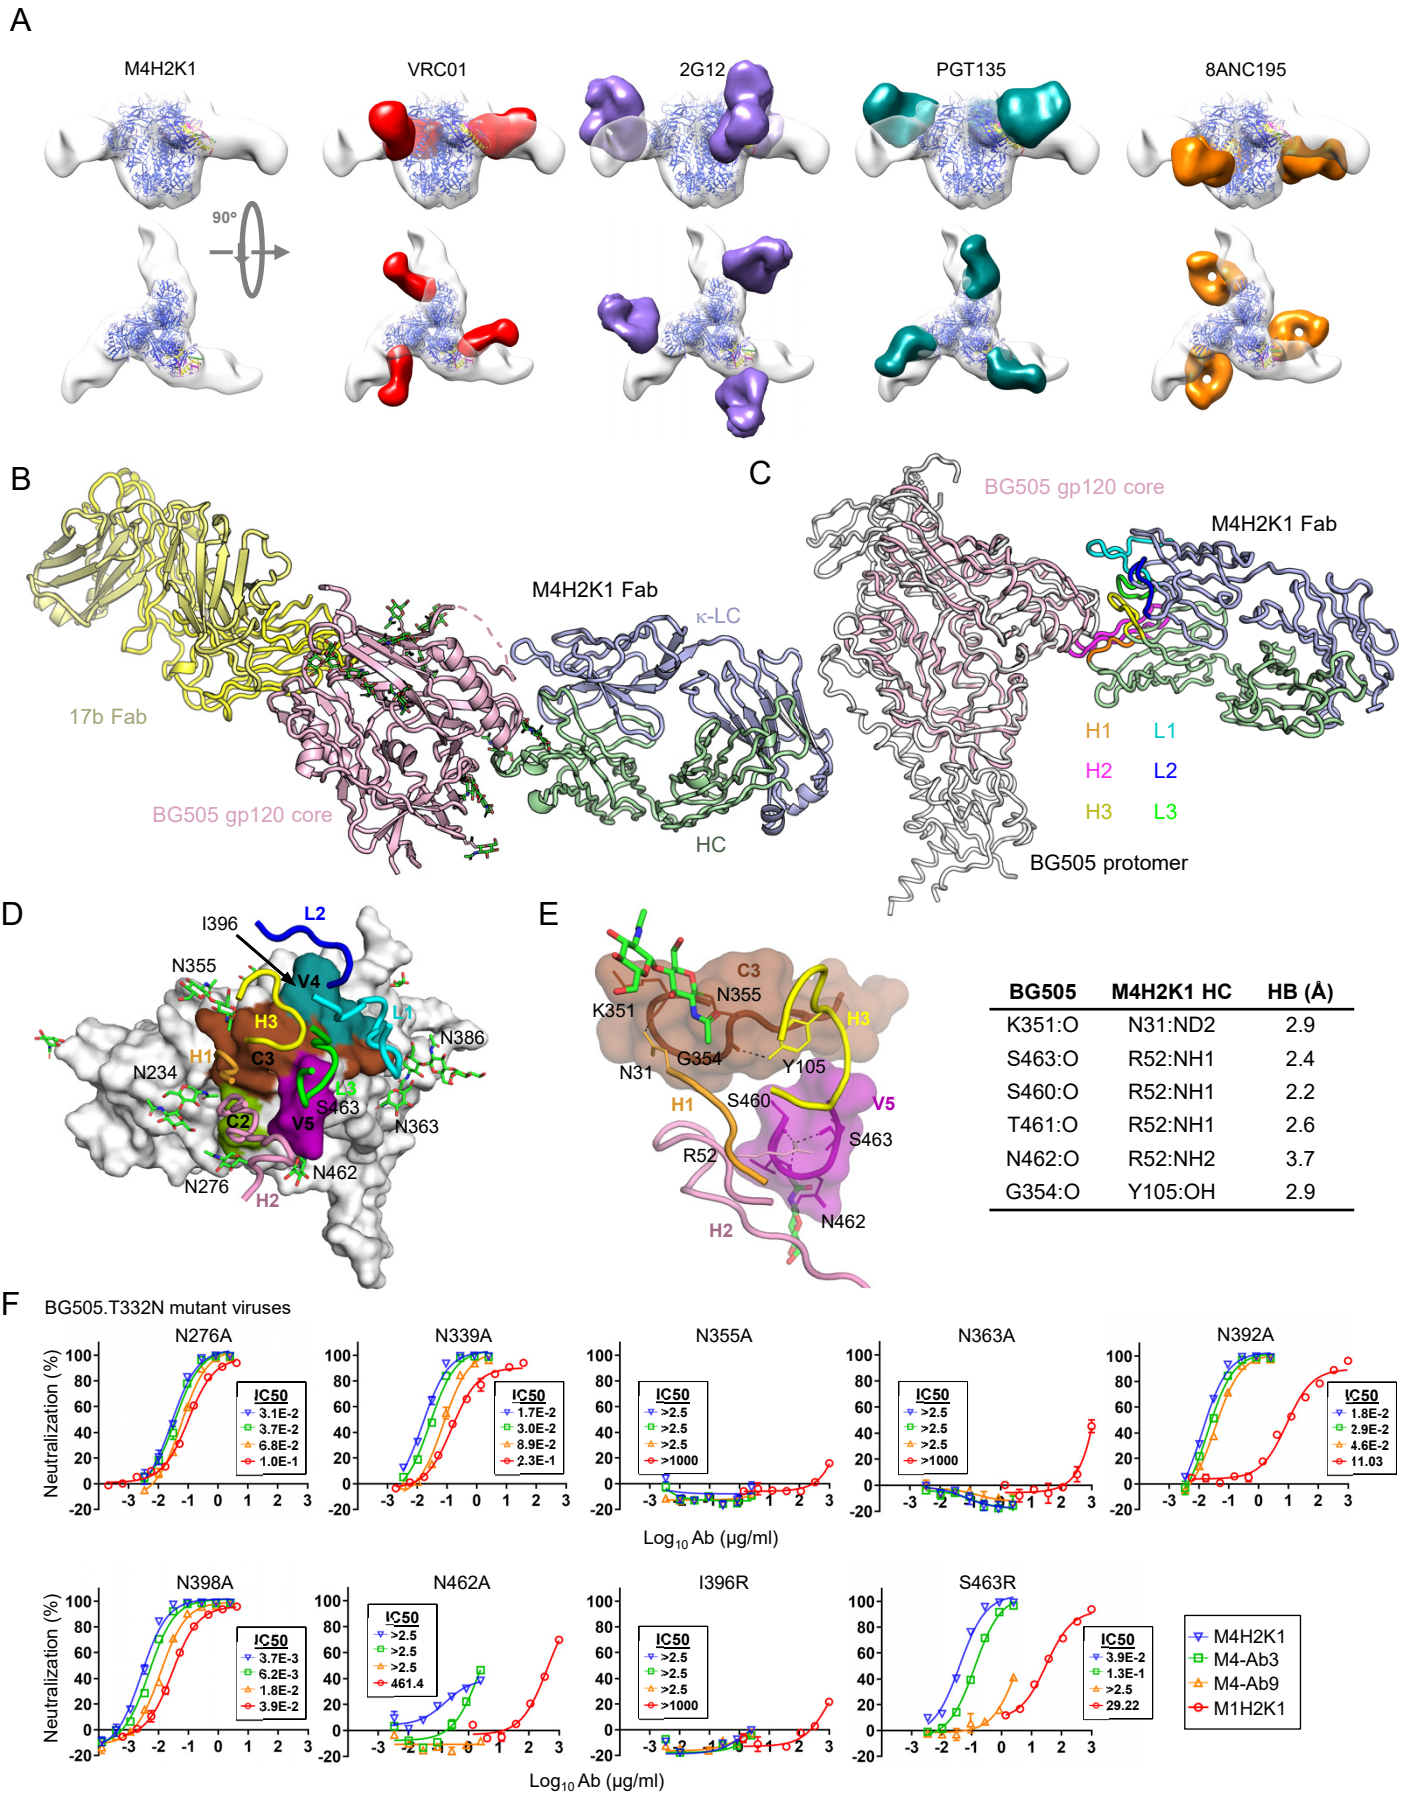



## Figure 3

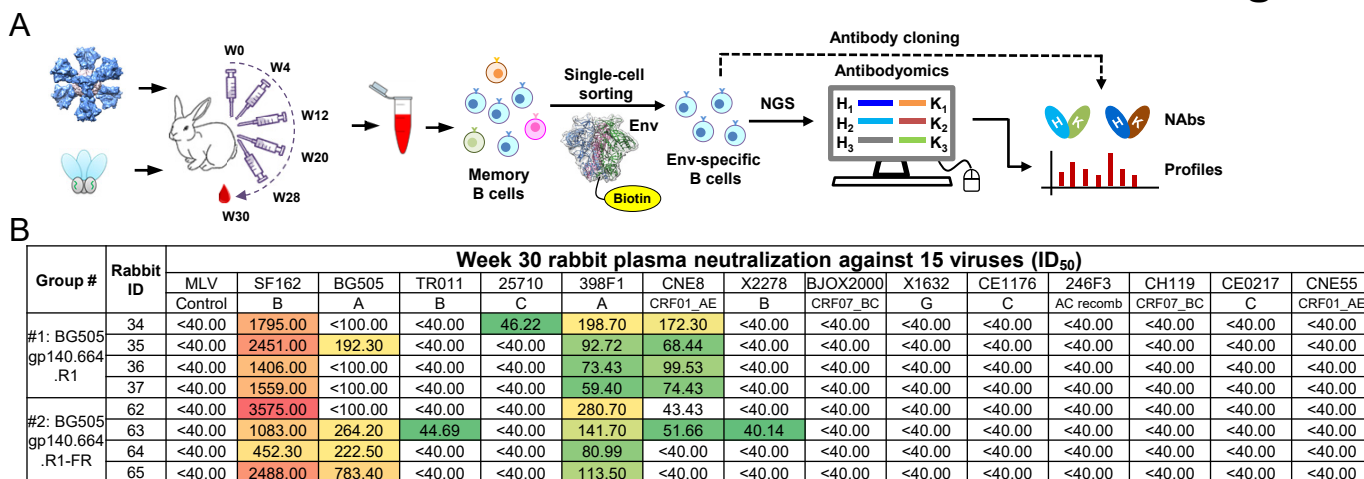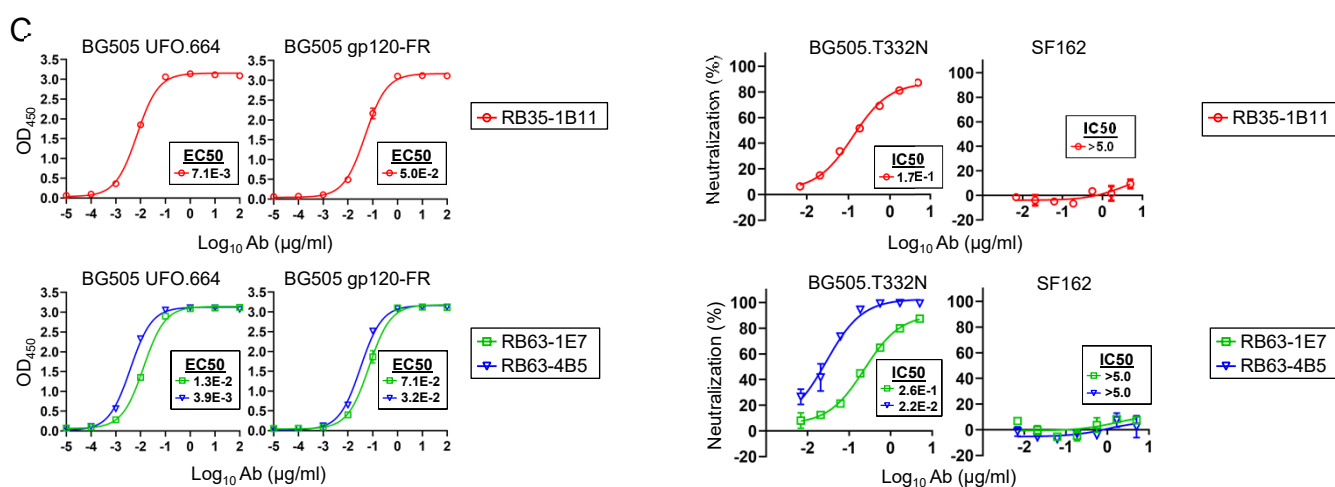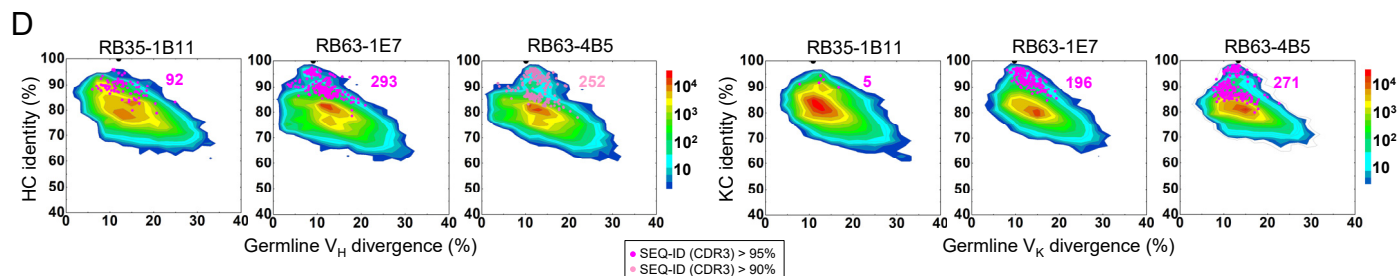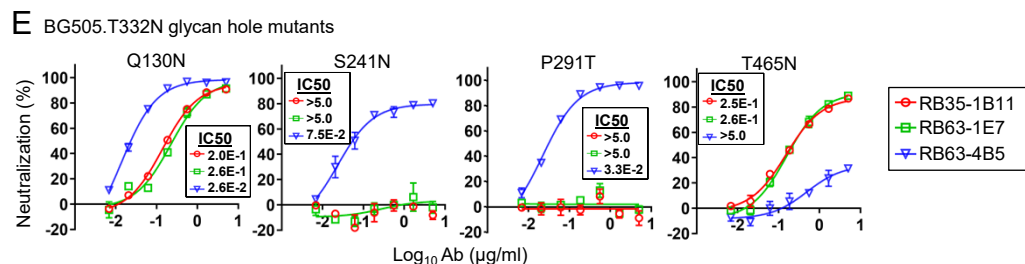

**F**

| Group #     | %neutralization of rabbit plasma against BG505.T332N glycan hole mutants <sup>a</sup> |       |       |       |                           |       |       |       |
|-------------|---------------------------------------------------------------------------------------|-------|-------|-------|---------------------------|-------|-------|-------|
|             | #1: BG505 gp140.664.R1                                                                |       |       |       | #2: BG505 gp140.664.R1-FR |       |       |       |
| RB ID       | 34                                                                                    | 35    | 36    | 37    | 62                        | 63    | 64    | 65    |
| BG505.T332N | 47.48                                                                                 | 80.15 | 46.03 | 58.38 | 54.45                     | 83.94 | 79.64 | 97.60 |
| S241N       | 3.20                                                                                  | 15.16 | 14.99 | 18.29 | 28.96                     | 34.27 | 44.16 | 54.09 |
| P291T       | 5.74                                                                                  | 22.14 | 24.12 | 10.63 | 31.22                     | 58.44 | 55.93 | 82.83 |
| T465N       | 46.49                                                                                 | 80.26 | 41.74 | 54.42 | 29.83                     | 64.36 | 61.76 | 44.50 |

<sup>a</sup> Color coding indicates percent reduction with respect to the % neutralization value obtained for BG505.T332N, <25% (green), 25-50% (yellow), 50-75% (orange) and >75% (red).

## Figure 4

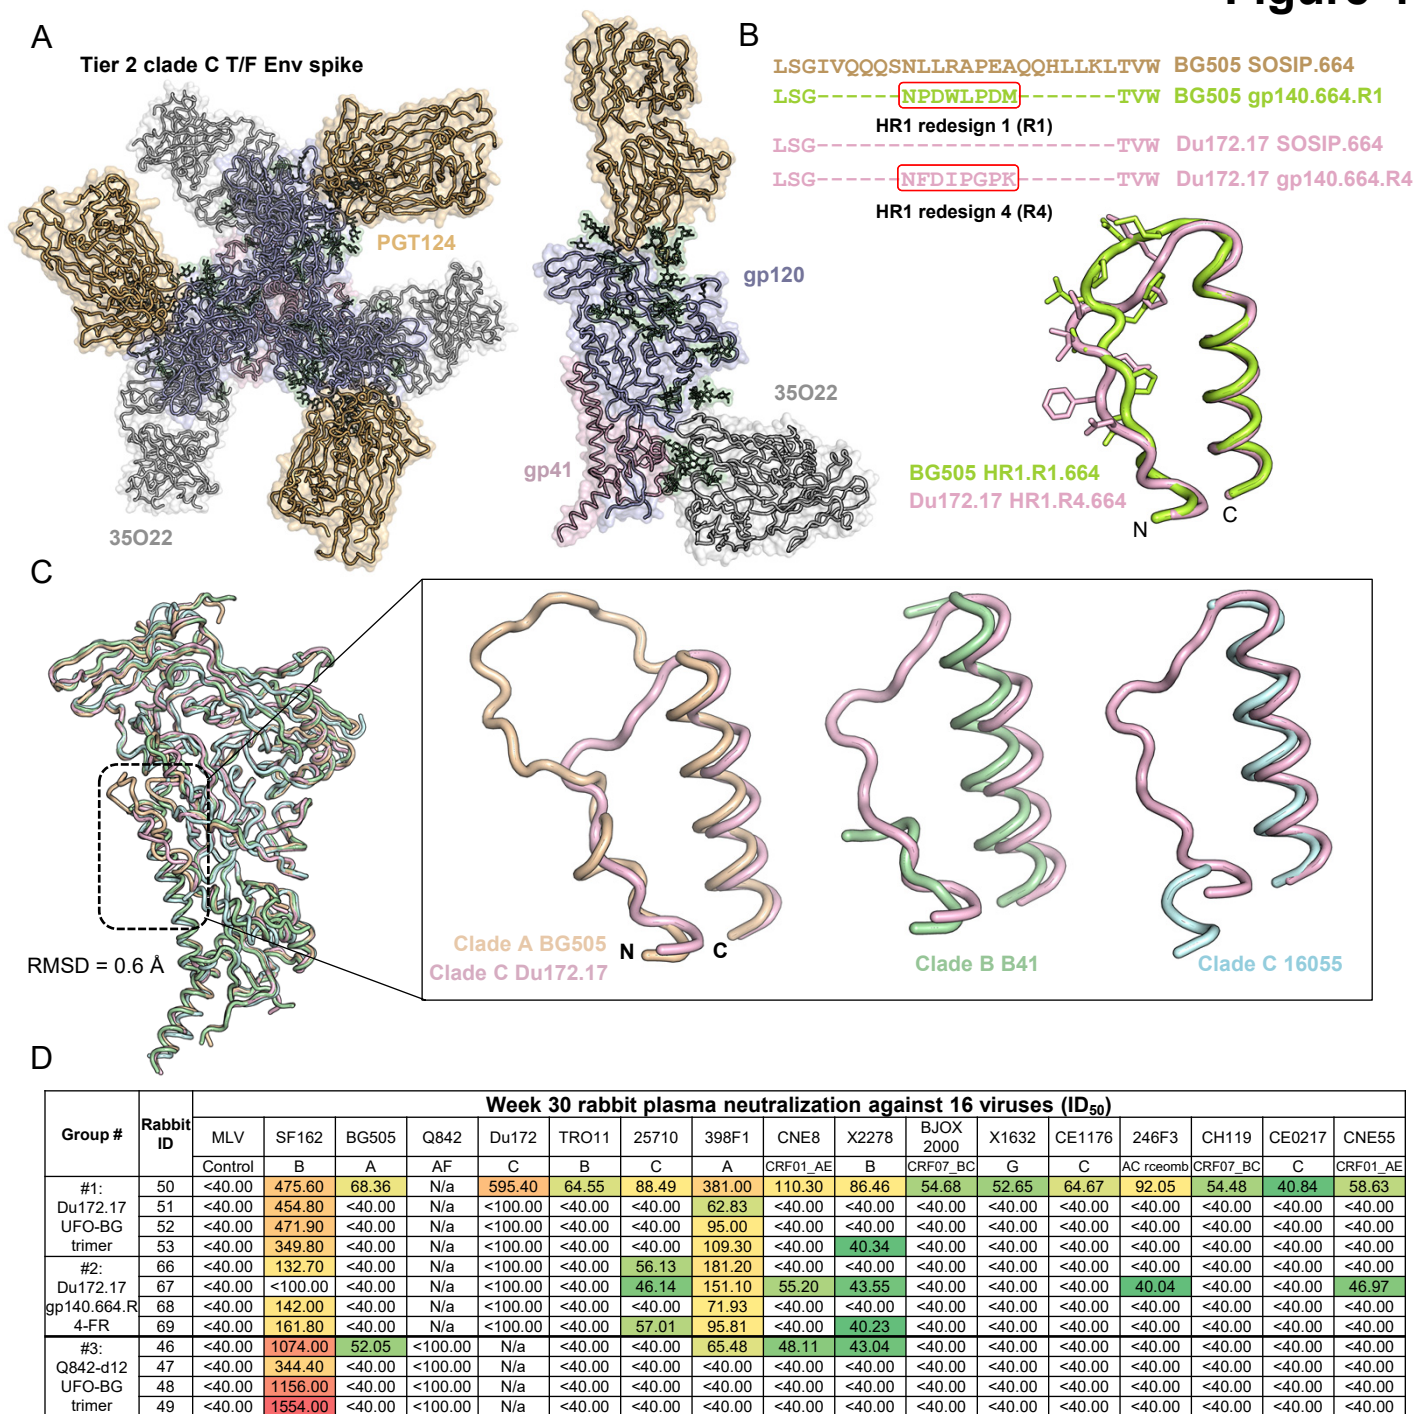

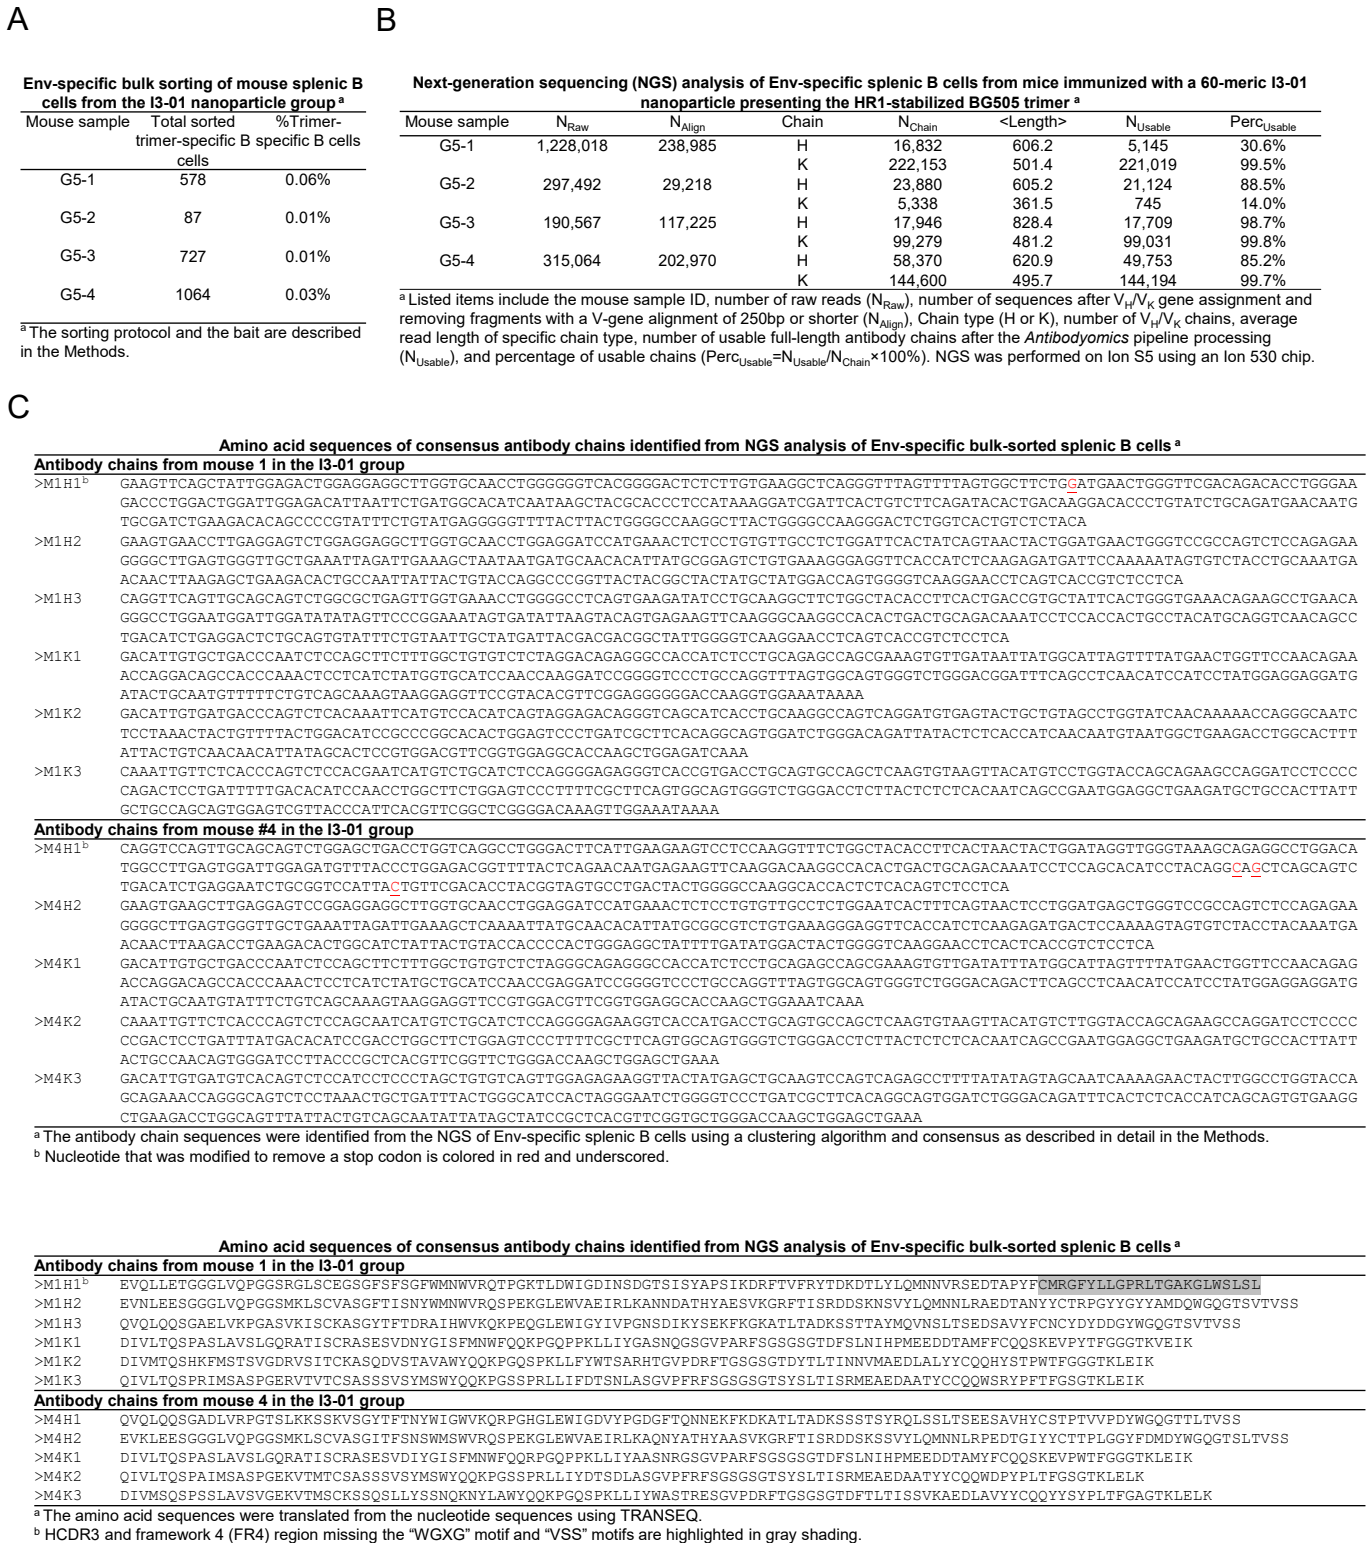

D

**Nucleotide sequences of two antibodies identified from splenic B cells of mouse 4 (M4) in the I3-01 group by Env-specific single-cell sorting<sup>a</sup>**

```
>M4-Ab3H CAGGTGCAGCTGCAGCAGCCTGGAGGAGCTCGGTGCAACCTGGAGGATCCATGAACTCTCCTGTGTTGCCTCTGGATTACCTTCAGTAATTCCTGGATGAAGTGGTCCGCCAGTCTCCAGAGAA
GGGGCTTGAGTGGGTTCGTAATTCGATTGAAAGTTTCATAATTATGCAACACATTATGCGGAGTCTGTGAAAGGGAGGTTCCACCATCTCAAGAGATGATCCAAAAGTAGTGTCTACCTGCAAAATGA
TCAACTTAAGACCAGAAGACACTGGCATTATTTATTGTTACTACCCACTGGGTGGCTACTTTCCTATGGACTACTGGGTCAAGGAACCACTCTCACAGTCTCCTCA
>M4-Ab3K GACATTTGCTGACCCCAATCTCCAACCTTTTGGCTGTGTCTTAGGGCAGAGGGCCACCATCTCCTGCAGAGCCAGCGAAAGTGTGATAAATTATGGCGTTAGTTTTATGAACTGGTTCCAACAGAA
ACCAGGACGGCCACCCAACTCCTCATCTATGCTGCATCCAAGCAAGGATCCGGGGTCCCTGCCAGGTTTAGTGCCAGTGGGTCTGGGACAGATTCAGCCTCAACATCCATCCAATGGAGGAGGATG
ATATTGCAATGATTTCTGTGCAAAAATAAGGAGCTTCCGTGGACGTTCCGTTGAGGACCAAGCTGAAAATCAA
>M4-Ab9H AGGGTGCAGCTGCAGCAGTCTTGTGGAGGCTTGGTGCACCTGGAGGATCCATGAACTCTCCTGCCTGCCCTTGAATCACTTTCAGTAACCTGGATGAAGTGGTCCGCCAGTCTCCAGAGAA
GGGGCTTGAGTGGGTTCGTAATTAGATTGAAAGTTAATAATTATGCAACACATTATGCGGAGTCTGTGAAAGGGAGGTTCCACCATCTCAAGAGATGATCCAAAAGGAGTGTCTACCTGCAAAATGA
ACAACCTAAGAGCTGAAGACACTGGCATTATTTACTGTACCACCCCACTGGGTGGCTACTATGCTGTGGACTACTGGGTCAAGGAGCCACTCTCACAGTCTCCTCA
>M4-Ab9K GACATCCAGATGATTCAGTCTCCAGCTCTTTGGCTGTGTCTTAGGGCAGAGGGCCACCATCTCCTGCAGAGCCAGCGAAAGTGTGATAAATTATGGCATTAGTTTTATGAACTGGTTCCAACAGAA
ACCAGGACAGCCACCCAACTCCTCATCTATGCTGCATCCAAGGATCCGGGGTCCCTGCCAGGTTTAGTGCCAGTGGGTCTGGGACAGACTTCAGCCTCAACATCCATCCTATGGAGGAGGATG
ATACTGCAATGATTTCTGTGCAAAAATAAGGAGGTTCCGTGGACGTTCCGTTGAGGACCAAGCTGAAAATCAA
```

<sup>a</sup> The antibody chain sequences were identified from Env-specific single-cell sorting, PCR and cloning as described in the Methods.

**Amino acid sequences of two antibodies identified from splenic B cells of mouse 4 (M4) in the I3-01 group by Env-specific single-cell sorting<sup>a</sup>**

```
>M4-Ab3H QVQLQQPFGGGSVQPGGSMKLSVAVSAGFTFSNSWMNWRQSPKGLWVAEIRLKVHNYATHYAESVKGRTISRDDSKSVYQLMNLRPEDTGIYYCTPLGGYFPMDYWGQGTTLTVSS
>M4-Ab3K DIVLTQSPATSLAVSLGQRATISCRASESDNYGVSFNNWFQKPRPKLLIYAASKQSGVPRFSGSGSDFSLNIHPMEEDDIAMYFCQNKELPWTFGGGTKLEIK
>M4-Ab9H RVQLQQSCGGLVQPGGSMKLSVAVSAGITFSNSWMNWRQSPKGLWVAEIRLKVNNYATHYAESVKGRTISRDDSKRSVYQLMNNLRAEDTGIYYCTPLGGYAVDYWGQATLTVSS
>M4-Ab9K DIQMIQSPASLAVSLGQRATISCRASESDNYGISFNNWFQKPPKLLIYAASNQSGVPRFSGSGSDFSLNIHPMEEDTAMFYCQQSKEVPWTFGGTKLEIK
```

<sup>a</sup> The amino acid sequences were translated from the nucleotide sequences using TRANSEQ.

**fig S1. HIV-1 Env-specific sorting and NGS of mouse splenic B cells for antibody isolation.** Mice immunized with BG505 gp140.664.R1-PADRE-I3-01 nanoparticle (see ref. 37) were analyzed in this study. (A) Env-specific mouse splenic B cells obtained from bulk sorting using a biotinylated Avi-tagged BG505 gp140.664.R1 trimer probe. (B) Antibodyomics pipeline processing of NGS data obtained from sequencing of Env-specific mouse splenic B cells on the Ion S5 platform. (C) Nucleotide and amino acid sequences of consensus antibody heavy and  $\kappa$ -light chains (HC and KC) identified from NGS analysis of Env-specific splenic B cells from mice 1 and 4 (M1 and M4) in the I3-01 nanoparticle group. (D) Nucleotide and amino acid sequences of two antibodies, Ab3 and Ab9, identified by single-cell sorting and antibody cloning from M4 splenic B cells. Ab3 and Ab9 use the same germline genes as the NGS-derived NAb, M4H2K1.



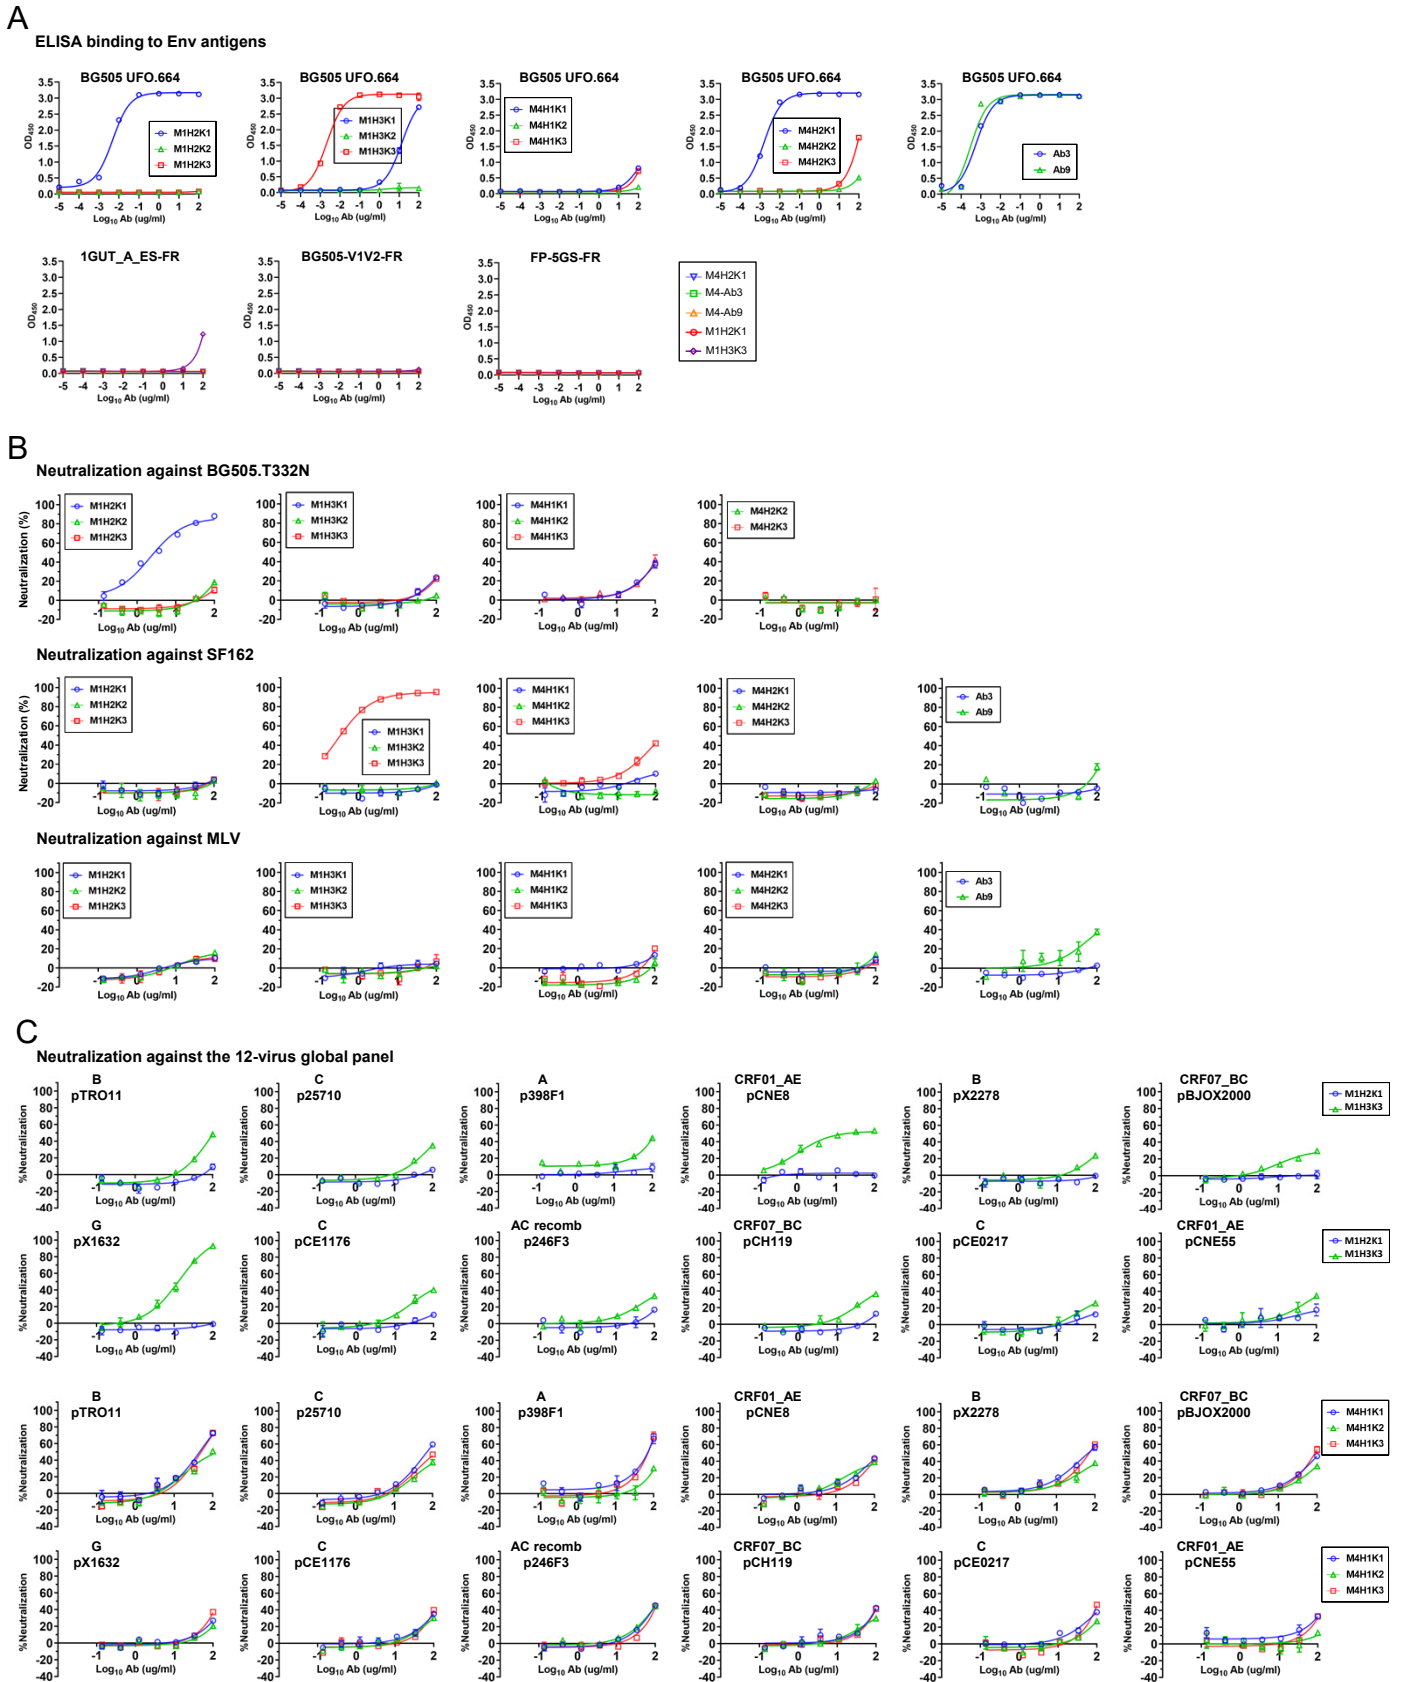

## Figure S2

C (continued)

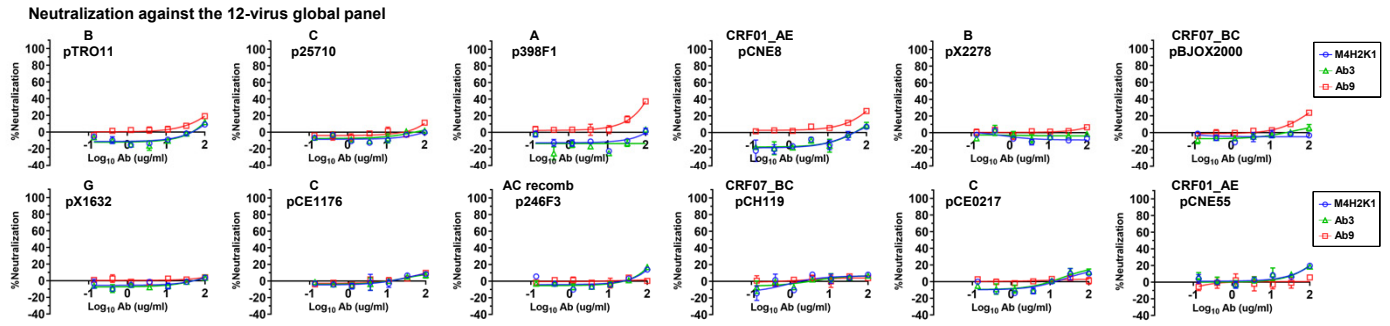

**fig S2. Functional evaluation of NGS and single-cell-derived mouse mAbs.** (A) ELISA binding of mouse mAbs to Env antigens including BG505 UFO.664 trimer (top panel) and three individual epitope probes including 1GUT\_A\_ES-FR (N332 supersite), BG505 V1V2-FR (V1V2 apex), and FP-5GS-FR (fusion peptide), which are all ferritin nanoparticles. (B) Neutralization of autologous tier 2 clade A BG505.T332N by mouse mAbs. (C) Neutralization of all 12 isolates from a global panel by mouse mAbs.

Figure S3

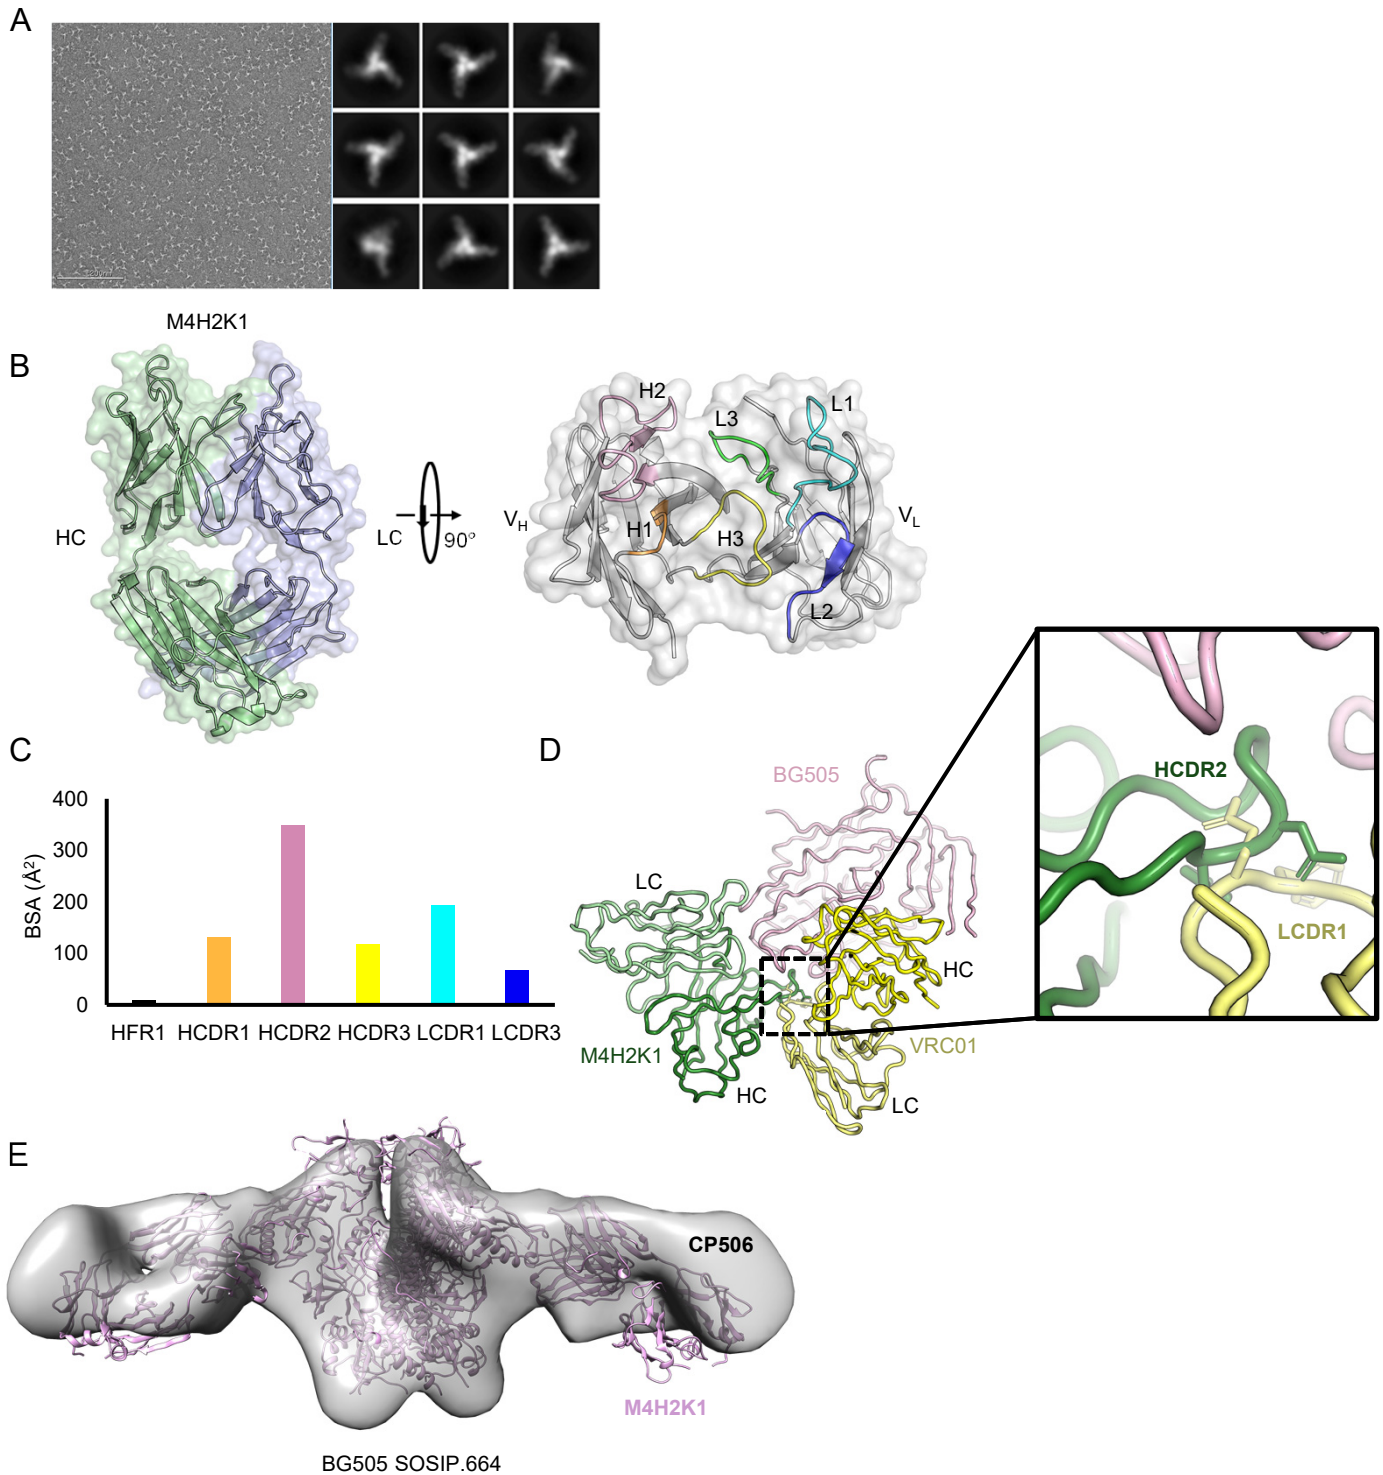

**fig. S3. Structural characterization of the NGS-derived mouse NAb, M4H2K1.** (A) Negative-stain EM (nsEM) analysis of mouse NAb M4H2K1 in complex with BG505 UFO.664 Env trimer. Left: EM micrograph; Right: 2D class averages. (B) The unbound structure of M4H2K1 in a ribbons model within the molecular surface. Left: side view; Right: top view. The H/LCDR loops are labeled on the structure. (C) Buried surface area (Å<sup>2</sup>) of the CDR loops and FRs of M4H2K1 Fab when bound to BG505 gp120 core. (D) Superimposition of VRC01 (yellow) Fab-bound BG505 SOSIP with M4H2K1 (green) Fab-bound BG505 core (pink). The right inset shows a clash of M4H2K1 HCDR2 with VRC01 LCDR1. (E) Comparison of the mode of recognition for M4H2K1 and CP506 when bound to the BG505 SOSIP.664 Env trimer.



Figure S4

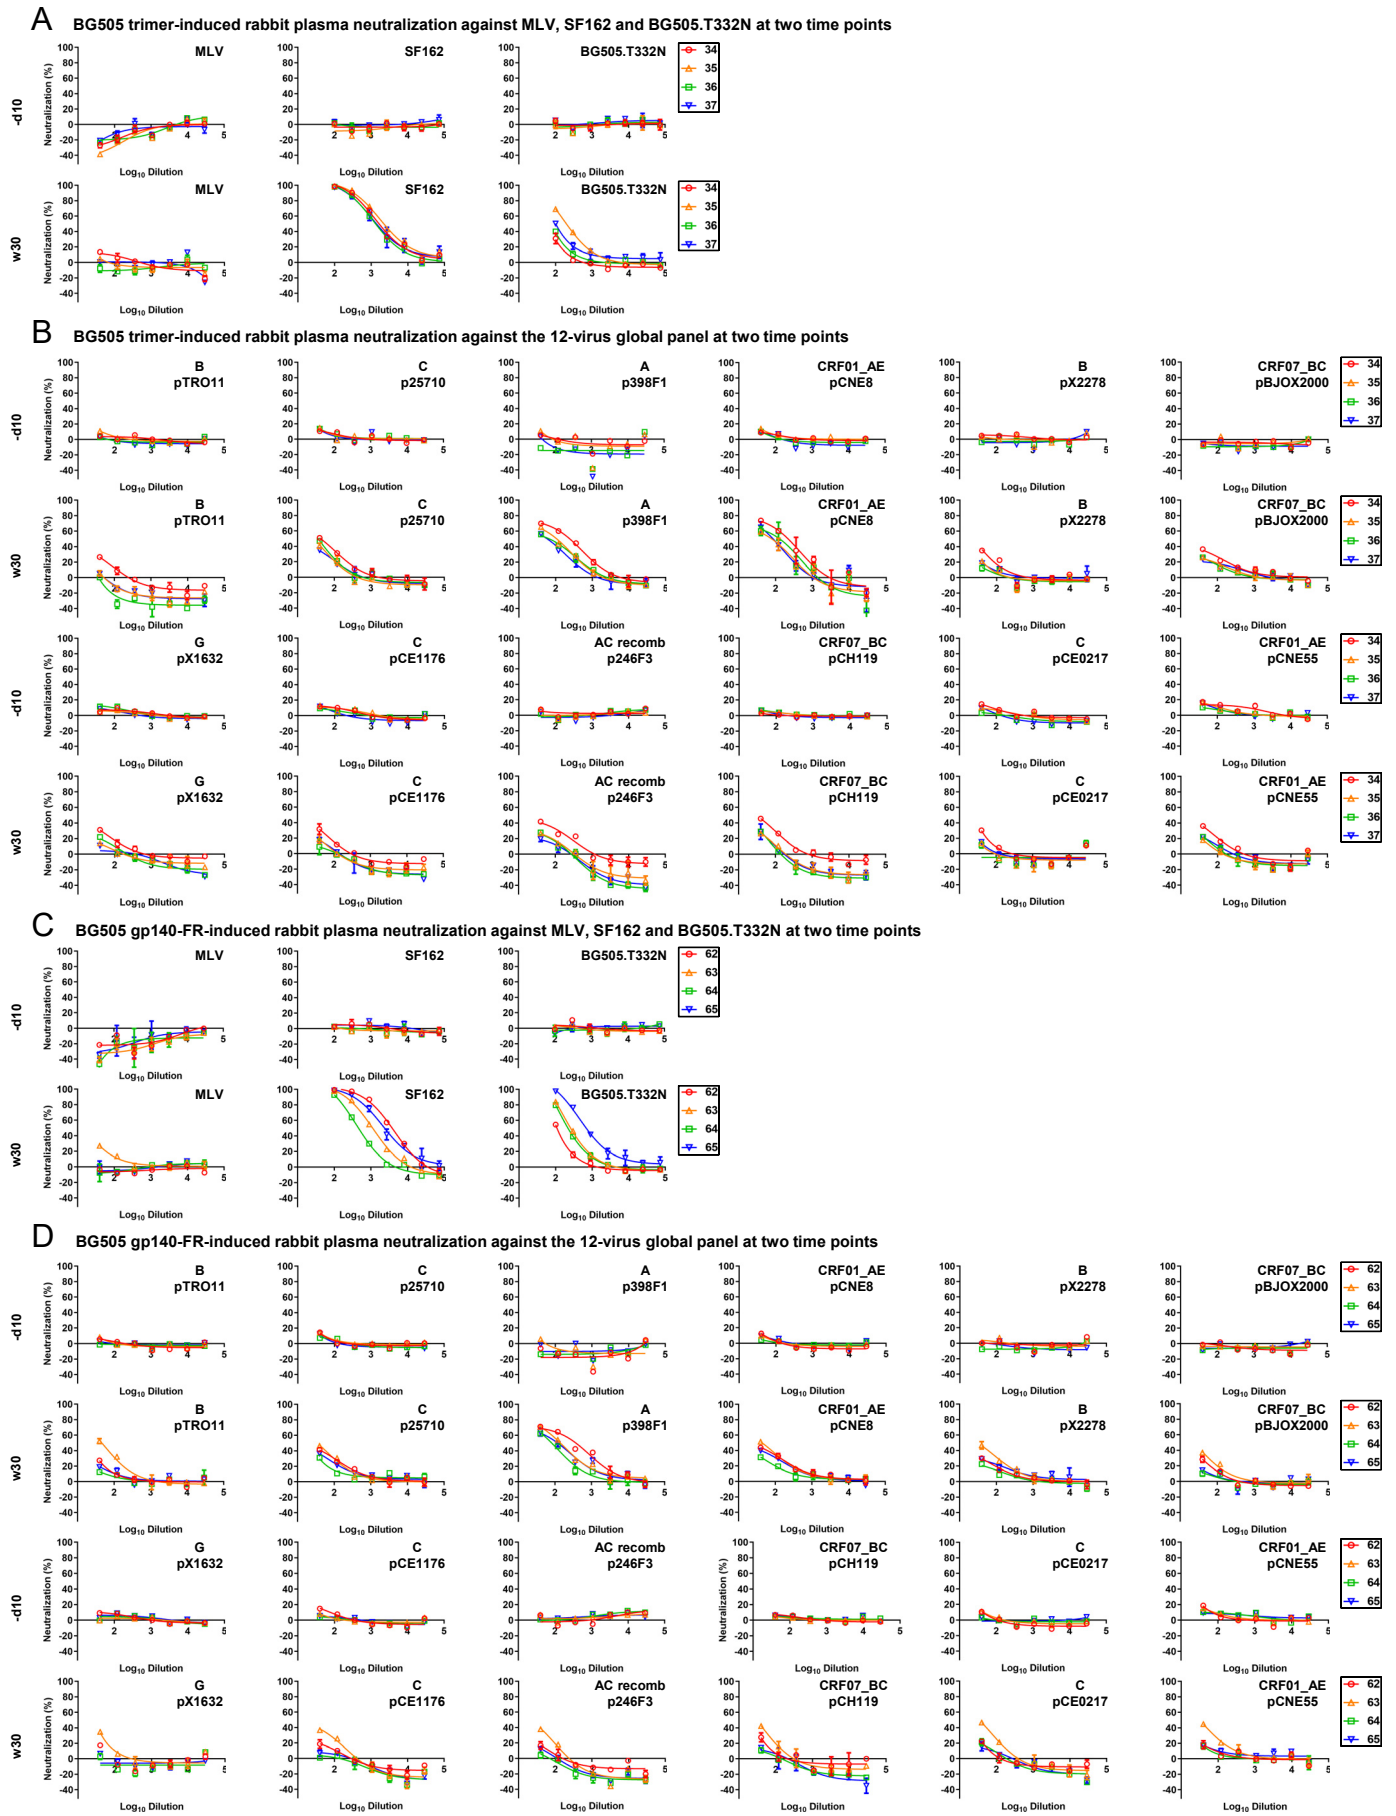

## Figure S4

**fig. S4. Rabbit plasma neutralization from two BG505 Env-immunized rabbit groups.** In the previous study (see ref. 37), two groups of rabbits were immunized with BG505 gp140.664.R1 trimer and its ferritin nanoparticle. **(A)** Neutralization of MLV, tier 1 clade B SF162, and tier 2 clade A BG505.T332N by day -10 (-d10) and week 30 (w30) rabbit plasma from the BG505 trimer group. **(B)** Neutralization of 12 isolates in the global panel by day -10 (-d10) and week 30 (w30) rabbit plasma from the BG505 trimer group. **(C)** Neutralization of MLV, SF162, and BG505.T332N by day -10 (-d10) and week 30 (w30) rabbit plasma from the BG505 ferritin nanoparticle group. **(D)** Neutralization of 12 isolates in the global panel by day -10 (-d10) and week 30 (w30) rabbit plasma from the BG505 ferritin nanoparticle group. The heat-inactivated rabbit plasma was diluted 100-fold for autologous tier 2 BG505.T332N and tier 1 SF162 and subjected to a 3-fold dilution series in the TZM-bl assay. To increase the sensitivity of detection, heat-inactivated plasma was diluted 40-fold for MLV and all 12 isolates from a global panel and followed by a 3-fold dilution series in the TZM-bl assays. ID<sub>50</sub> titers for plots (A) – (D) are shown in Fig. 3B.

**A Antibody isolation by single B-cell sorting, cloning and screening**

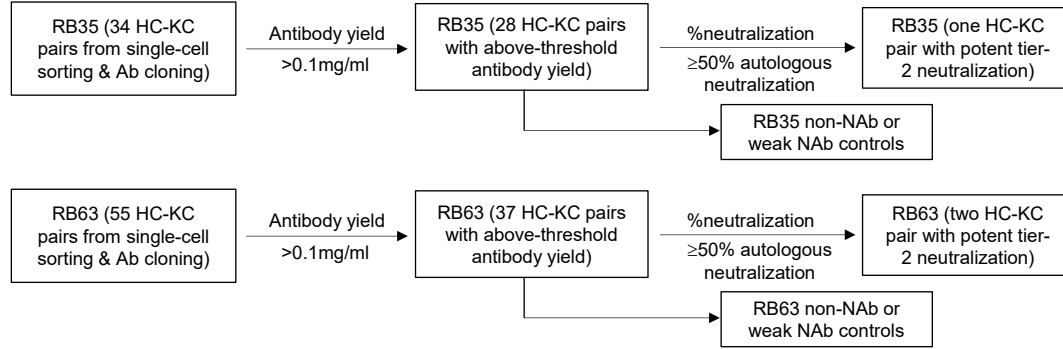

**B Sequences of three rabbit monoclonal antibodies (mAbs)**

```

>RB35-1B11 HC (IGHV1S45*01/IGHD6-1*01/IGHJ4*01)
QLEESGGGLVQPGGTLTLTKASGDFDYDGYMCMWVRQAPGKGLEWIGCIPTDNSRTYYASWAKGRFTISKTSSTTVTLQMTSLTAADTATYFCRTRDYPGDADPFRLWPGPGLTVTVSS
>RB35-1B11 KC (IGKV1S36*01/IGKJ1-2*01)
DIVMTQTFASVSAAVGGTVTIKQCASESIYSNLAWYQQKPGQAPKVLIIYSSNLESGVPSRFKSGSGAEYTLTISDLECAADAATYYCQCTYDVTITGGYIGNSPGGGTGLVLVK

>RB63-1E7 HC (IGHV1S40*01/IGHD2-1*01/IGHJ4*01)
HSQLVESGGGLVQPGASLTLTKASGDFSDGYISWVRQAPGKGLEWIGWIYDTSVTSYASWAHGRFTISKTSSTTVTLQMTSLTAADTATYFCARVDHDRDYRAVRGKLLWPGPGLTVTVSS
>RB63-1E7 KC (IGKV1S10*01/IGKJ1-2*01)
ELVMTQTFASVEAAVGGTVTIKQASQSIYSNLWSYQQKPGQPPKLLIYRASTLESQVPSRFKSGSGGTQFTLTISDLECAADAATYYCQCTFTAVDRGFGDTPGGTEVTVVK

>RB63-4B5 HC (IGHV1S40*01/undetermined IGHJ/IGHJ2*01)
SQSLEESGGGLVQPGGSLTLTKASGDFSSSYVWVRQAPGKGLEWIGCIYNDYGHAYASWVNGRFTISKPSSTTVTLQMTSLTAADTATYFCARSIELDNLNAFDPWPGPGLTVTVSS
>RB63-4B5 KC (IGKV1S15*01/IGKJ1-2*01)
ELDMTQTFPSSTSAAVGGTVTITCQSSSEVWRNWLAWYQQKTPKPPKLLIYLASTLASGVPSRFKSGSGGTQFTLTISGVQCEDAATYYCQGTYSSSHAWYVTPGGTEVTVVK
  
```

**C ELISA binding to three epitope probes**

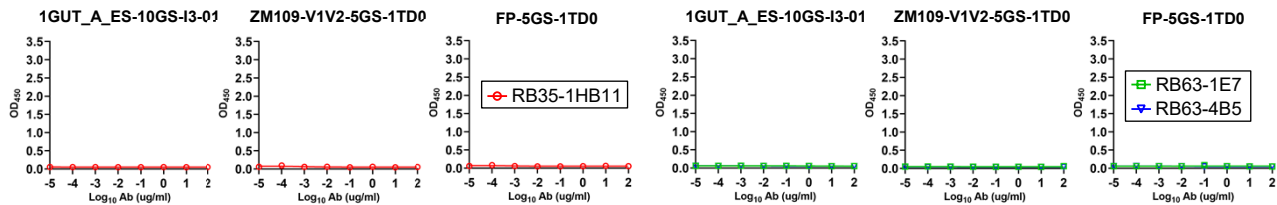

**D Neutralization against a negative control, MLV**

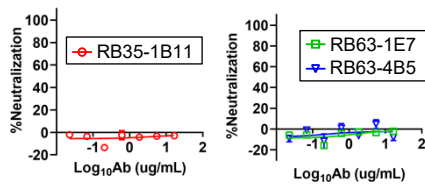

## Figure S5

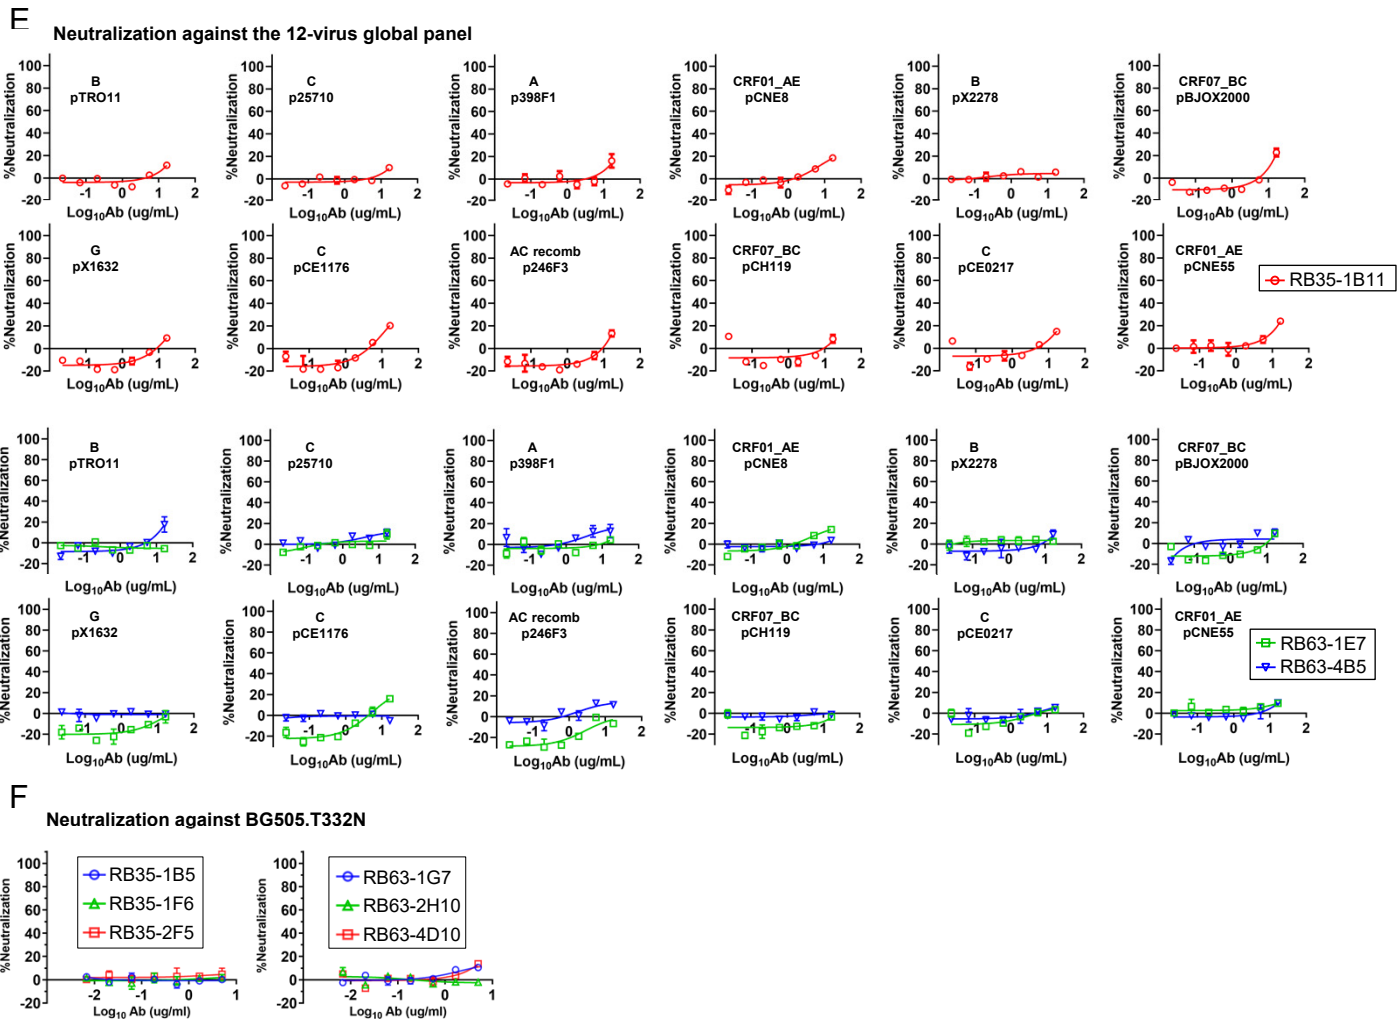

**fig. S5. Functional evaluation of single-cell sorted rabbit mAbs.** (A) Schematic representation of the procedure used to select functional mAbs from a rabbit immunized with BG505 gp140.664.R1 trimer (RB35) and a rabbit immunized with BG505 gp140.664.R1-FR nanoparticle (RB63). The two major selection criteria are: (1) yield  $\geq 0.1$ mg/ml after purification and concentration, and (2) %neutralization  $\geq 50\%$  at 10ug/ml for BG505.T332N. Weak/non-NABs matching only the first criterion may be selected for comparison. (B) Amino acid sequences of three rabbit NABs identified from this screening procedure. (C) ELISA binding by the RB35/RB63 NABs to an I3-01 nanoparticle presenting 24 copies of an N332 scaffold (1GUT\_A\_ES), a trimeric scaffold (1TD0) presenting ZM109 V1V2, and the same trimeric scaffold (1TD0) presenting fusion peptide (FP-5GS-1TD0). Antibodies were diluted to 100ug/ml and subjected to a 10-fold dilution series in the assay. (D) Neutralization of MLV by the RB35/RB63 NABs. (E) Neutralization of all 12 isolates from a global panel by the RB35/RB63 NABs. Antibodies were diluted to 33.3ug/ml and followed by a 3-fold dilution series in the TZM-bl assay. (F) ELISA binding of six non-NABs, two from each rabbit, to BG505 UFO.664 trimer.

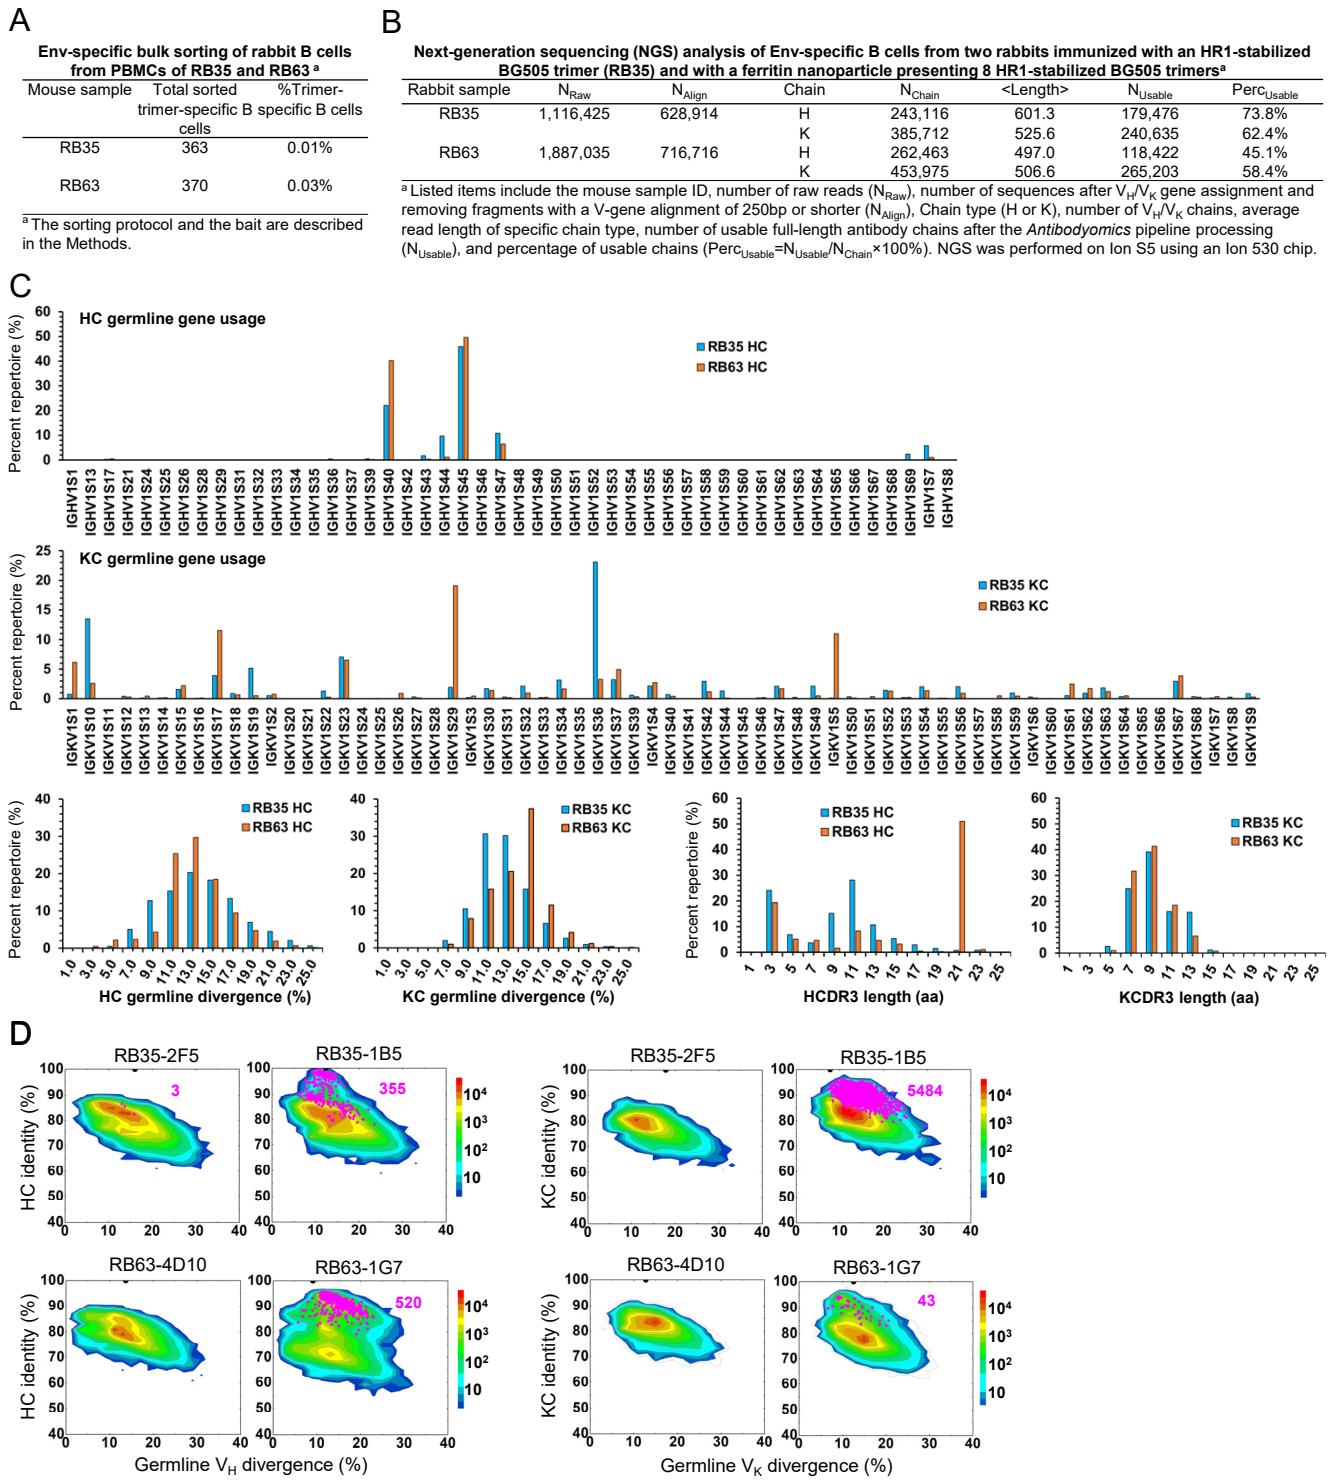

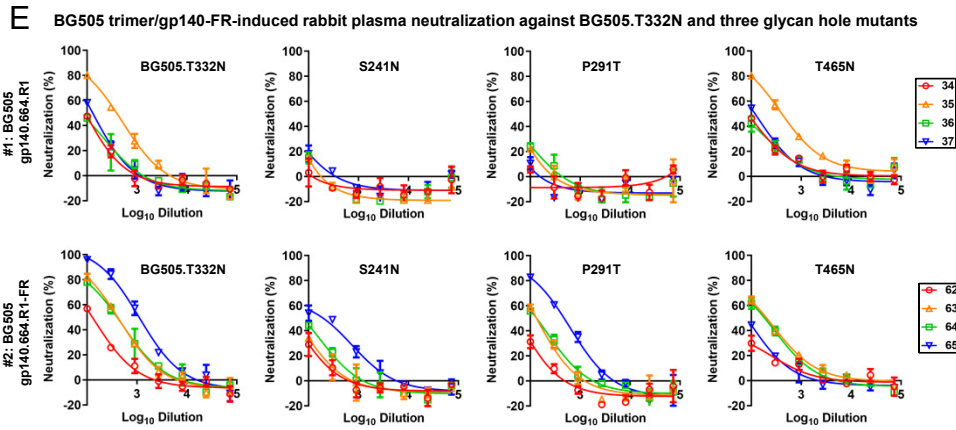

**fig. S6. HIV-1 Env-specific sorting and NGS of rabbit B cells for antibody isolation.** PBMCs from a rabbit immunized with BG505 gp140.664.R1 trimer (RB35) and a rabbit immunized with BG505 gp140.664.R1-FR10 nanoparticle (RB63) were analyzed. **(A)** Env-specific rabbit B cells obtained from bulk sorting using a biotinylated Avi-tagged BG505 gp140.664.R1 trimer probe. **(B)** Antibodyomics pipeline processing of NGS data obtained from sequencing of Env-specific rabbit B cells on the Ion S5 platform. **(C)** Quantitative B cell repertoire profiles derived from the NGS analysis of Env-specific RB35 and RB63 B cells, including HC and KC germline gene usage, somatic hypermutation (SHM), and CDR3 length. **(D)** Divergence-identity analysis of four representative non-NAbs in the context of Env-specific antibody repertoires for RB35 and RB63. HC and KC sequences are plotted as a function of sequence identity to the template and sequence divergence from putative germline genes. Color coding indicates sequence density. Templates and sequences identified based on the CDR3 identity of 95% or greater are shown as black and magenta dots on the plots, respectively, with the number of sequences labeled accordingly. **(E)** Rabbit plasma neutralization from two BG505 Env-immunized rabbit groups against three glycan hole mutants with respect to BG505.T332N. The heat-inactivated rabbit plasma was diluted 100-fold as the starting point and subjected to a 3-fold dilution series in the TZM-bl assay. The %neutralization values obtained from the first dilution are reported in Fig. 3F.



## Figure S7

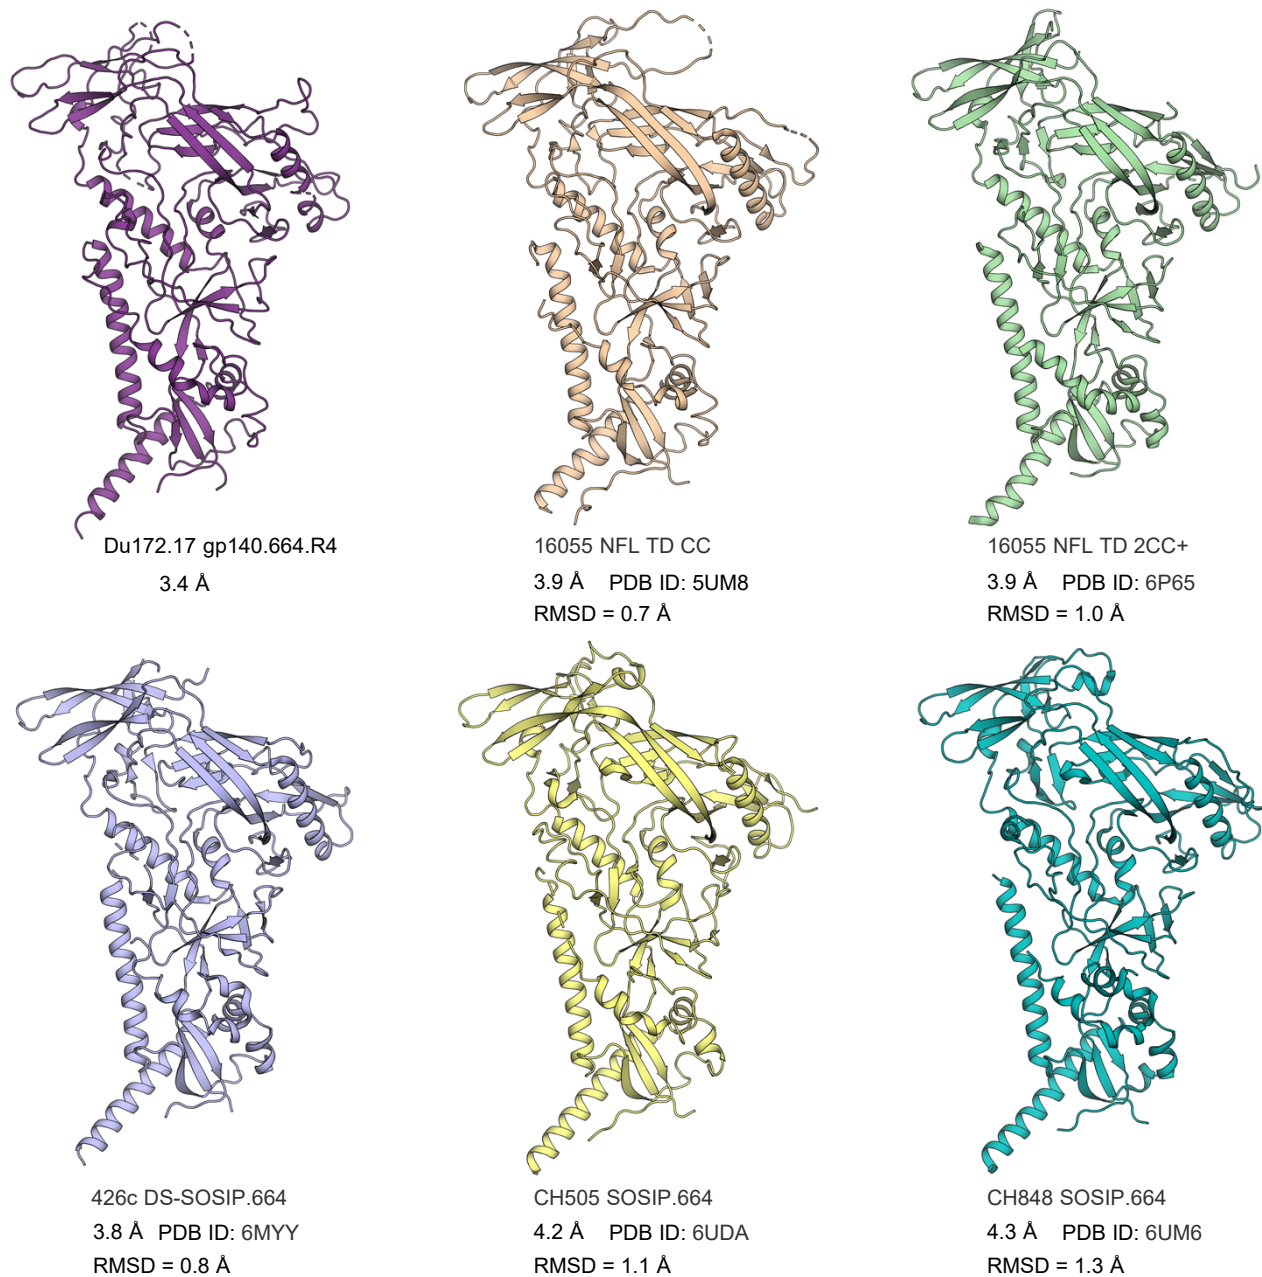

**fig. S7. Structural comparison of HIV-1 Envs across clade C isolates.** Ribbons view of two crystal structures (Du172.17 here and PDB ID: 5UM8) and four cryo-EM models (PDB IDs: 6P65, 6MY Y, 6UDA, and 6UM6) obtained for clade C isolates. The  $C\alpha$  RMSD after superposition of each structure on Du172.17 gp140.664.R4 is shown.



Figure S8

|              | N88 | N130 | N139 | N142 | N148 | N156 | N160 | N186 | N189 | N197 | N230 | N234 | N241 | N262 | N276 | N289 | N295 | N301 | N332 | N339 | N355 | N392 | N406 | N412 | N442 | N448 | N463 | N611 | N618 | N625 | N637 |    |
|--------------|-----|------|------|------|------|------|------|------|------|------|------|------|------|------|------|------|------|------|------|------|------|------|------|------|------|------|------|------|------|------|------|----|
| SOSIP.664    |     |      |      |      |      |      |      |      |      |      |      |      |      |      |      |      |      |      |      |      |      |      |      |      |      |      |      |      |      |      |      |    |
| High Mannose | 95  | 99   | 30   | 0    | 100  | n.d. | 99   | n.d. | n.d. | 76   | 100  | n.d. | n.d. | 100  | 99   | n.d. | 100  | n.d. | 100  | 100  | 14   | 100  | 0    | 100  | 100  | 100  | 7    | 0    | n.d. | 39   | 91   |    |
| M9           | 0   | 41   | 0    | 0    | 0    | 10   |      |      |      | 9    | 80   |      |      | 82   | 4    | 100  |      |      | 90   | 31   | 0    | 0    | 0    | 100  | 52   | 76   | 0    | 0    | 0    | 0    | 4    |    |
| M8           | 16  | 44   | 0    | 0    | 0    | 48   |      |      |      | 28   | 20   |      |      | 15   | 70   |      |      |      | 9    | 51   | 0    | 100  | 0    | 42   | 20   | 0    | 0    | 0    | 0    | 2    | 27   |    |
| M7           | 21  | 9    | 0    | 0    | 100  |      | 20   |      |      | 13   | 0    |      |      | 2    | 14   |      |      |      | 0    | 13   | 1    | 0    | 0    | 0    | 5    | 4    | 0    | 0    | 0    | 3    | 33   |    |
| M6           | 29  | 4    | 5    | 0    | 0    | 10   |      |      |      | 7    | 0    |      |      | 1    | 6    |      |      |      | 0    | 4    | 2    | 0    | 0    | 0    | 1    | 1    | 0    | 0    | 0    | 5    | 7    |    |
| M5           | 20  | 2    | 25   | 0    | 0    | 9    |      |      |      | 16   | 0    |      |      | 0    | 3    |      |      |      | 0    | 0    | 10   | 0    | 0    | 0    | 0    | 0    | 5    | 0    | 0    | 24   | 19   |    |
| M4           | 6   | 0    | 0    | 0    | 0    | 1    |      |      |      | 0    | 0    |      |      | 0    | 1    |      |      |      | 0    | 0    | 0    | 0    | 0    | 0    | 0    | 0    | 0    | 0    | 0    | 0    | 0    |    |
| M3           | 0   | 0    | 0    | 0    | 0    | 0    |      |      |      | 0    | 0    |      |      | 0    | 0    |      |      |      | 0    | 0    | 0    | 0    | 0    | 0    | 0    | 0    | 0    | 0    | 0    | 0    | 0    |    |
| Hybrid       | 3   | 0    | 0    | 0    | 0    | 1    |      |      |      | 2    | 0    |      |      | 0    | 0    |      |      |      | 0    | 0    | 0    | 0    | 0    | 0    | 0    | 0    | 0    | 0    | 0    | 3    | 0    |    |
| Fhybrid      | 0   | 0    | 0    | 0    | 0    | 0    |      |      |      | 2    | 0    |      |      | 0    | 0    |      |      |      | 0    | 0    | 1    | 0    | 0    | 0    | 0    | 0    | 0    | 0    | 0    | 1    | 0    |    |
| A1           | 1   | 0    | 0    | 0    | 0    | 0    |      |      |      | 1    | 0    |      |      | 0    | 0    |      |      |      | 0    | 0    | 1    | 0    | 0    | 0    | 0    | 0    | 1    | 0    | 0    | 4    | 0    |    |
| FA1          | 0   | 0    | 11   | 0    | 0    | 0    |      |      |      | 4    | 0    |      |      | 0    | 0    |      |      |      | 0    | 0    | 6    | 0    | 0    | 0    | 0    | 0    | 3    | 0    | 0    | 4    | 4    |    |
| A2/A1B       | 1   | 0    | 0    | 0    | 0    | 0    |      |      |      | 0    | 0    |      |      | 0    | 0    |      |      |      | 0    | 0    | 0    | 0    | 0    | 0    | 0    | 0    | 6    | 0    | 0    | 9    | 0    |    |
| FA2/FA1B     | 1   | 0    | 12   | 6    | 0    | n.d. | 1    | n.d. | n.d. | 10   | 0    | n.d. | n.d. | 0    | 0    | n.d. | n.d. |      | 0    | 0    | 16   | 0    | 47   | 0    | 0    | 0    | 21   | 25   | n.d. | 23   | 4    |    |
| A3/A2B       | 0   | 0    | 0    | 0    | 0    | 0    | n.d. | n.d. | n.d. | 0    | 0    | n.d. | n.d. | 0    | 0    | n.d. | n.d. |      | 0    | 0    | 0    | 0    | 0    | 0    | 0    | 0    | 1    | 5    | 1    | 0    | 0    |    |
| FA3/FA2B     | 1   | 0    | 47   | 56   | 0    | 0    |      |      |      | 7    | 0    |      |      | 0    | 0    |      |      |      | 0    | 0    | 50   | 0    | 53   | 0    | 0    | 0    | 46   | 67   | 20   | 0    | 0    |    |
| A4/A3B       | 0   | 0    | 0    | 0    | 0    | 0    |      |      |      | 0    | 0    |      |      | 0    | 0    |      |      |      | 0    | 0    | 0    | 0    | 0    | 0    | 0    | 0    | 0    | 0    | 0    | 0    | 0    |    |
| FA4/FA3B     | 0   | 0    | 0    | 38   | 0    | 0    |      |      |      | 1    | 0    |      |      | 0    | 0    |      |      |      | 0    | 0    | 12   | 0    | 0    | 0    | 0    | 0    | 15   | 3    | 0    | 0    | 0    |    |
| Unoccupied   | 0   | 0    | 0    | 0    | 0    | 0    | 0    | 0    | 0    | 0    | 0    | 0    | 0    | 0    | 0    | 0    | 0    | 0    | 0    | 0    | 1    | 0    | 0    | 0    | 0    | 0    | 0    | 0    | 0    | 0    | 1    |    |
| gp140.664.R4 |     |      |      |      |      |      |      |      |      |      |      |      |      |      |      |      |      |      |      |      |      |      |      |      |      |      |      |      |      |      |      |    |
| High mannose | 99  | 99   | 34   | 0    | 100  | n.d. | 98   | n.d. | n.d. | 96   | 100  | n.d. | n.d. | 100  | 100  | n.d. | 100  | 100  | 100  | 100  | 21   | 100  | 0    | 100  | 100  | 100  | 10   | 67   | 0    | 51   | 99   |    |
| M9           | 0   | 47   | 0    | 0    | 0    | 38   |      |      |      | 38   | 88   |      |      | 87   | 15   |      |      |      | 100  | 86   | 93   | 36   | 0    | 0    | 0    | 100  | 60   | 77   | 0    | 0    | 0    | 11 |
| M8           | 23  | 45   | 0    | 0    | 0    | 46   |      |      |      | 42   | 12   |      |      | 13   | 75   |      |      |      | 0    | 14   | 6    | 49   | 1    | 82   | 0    | 32   | 20   | 0    | 0    | 2    | 34   |    |
| M7           | 24  | 4    | 7    | 0    | 68   |      | 7    |      |      | 8    | 0    |      |      | 0    | 8    |      |      |      | 0    | 0    | 12   | 2    | 18   | 0    | 0    | 7    | 3    | 1    | 5    | 0    | 11   | 31 |
| M6           | 31  | 2    | 5    | 0    | 0    | 4    |      |      |      | 4    | 0    |      |      | 0    | 2    |      |      |      | 0    | 0    | 3    | 3    | 0    | 0    | 0    | 0    | 0    | 4    | 0    | 8    | 12   |    |
| M5           | 15  | 1    | 21   | 0    | 32   |      | 3    |      |      | 4    | 0    |      |      | 0    | 0    |      |      |      | 0    | 0    | 0    | 13   | 0    | 0    | 0    | 0    | 7    | 59   | 0    | 25   | 7    |    |
| M4           | 4   | 0    | 2    | 0    | 0    | 1    |      |      |      | 0    | 0    |      |      | 0    | 0    |      |      |      | 0    | 0    | 0    | 1    | 0    | 0    | 0    | 0    | 1    | 0    | 0    | 0    | 0    |    |
| M3           | 0   | 0    | 0    | 0    | 0    | 0    |      |      |      | 0    | 0    |      |      | 0    | 0    |      |      |      | 0    | 0    | 0    | 0    | 0    | 0    | 0    | 0    | 1    | 0    | 0    | 0    | 0    |    |
| Hybrid       | 1   | 0    | 0    | 0    | 0    | 0    |      |      |      | 0    | 0    |      |      | 0    | 0    |      |      |      | 0    | 0    | 0    | 0    | 0    | 0    | 0    | 0    | 0    | 0    | 0    | 4    | 3    |    |
| Fhybrid      | 0   | 0    | 0    | 0    | 0    | 0    |      |      |      | 0    | 0    |      |      | 0    | 0    |      |      |      | 0    | 0    | 0    | 1    | 0    | 0    | 0    | 0    | 0    | 0    | 0    | 1    | 0    |    |
| A1           | 1   | 0    | 1    | 0    | 0    | 1    |      |      |      | 0    | 0    |      |      | 0    | 0    |      |      |      | 0    | 0    | 0    | 1    | 0    | 0    | 0    | 0    | 0    | 2    | 0    | 5    | 0    |    |
| FA1          | 0   | 0    | 7    | 0    | 0    | 0    |      |      |      | 0    | 0    |      |      | 0    | 0    |      |      |      | 0    | 0    | 0    | 7    | 0    | 0    | 0    | 0    | 4    | 4    | 0    | 4    | 0    |    |
| A2/A1B       | 0   | 0    | 0    | 0    | 0    | 0    |      |      |      | 0    | 0    |      |      | 0    | 0    |      |      |      | 0    | 0    | 0    | 0    | 0    | 0    | 0    | 0    | 0    | 0    | 0    | 10   | 0    |    |
| FA2/FA1B     | 0   | 0    | 14   | 33   | 0    | n.d. | 0    | n.d. | n.d. | 1    | 0    | n.d. | n.d. | 0    | 0    | n.d. | n.d. |      | 0    | 0    | 0    | 18   | 0    | 100  | 0    | 0    | 25   | 9    | 51   | 19   | 1    |    |
| A3/A2B       | 0   | 0    | 0    | 0    | 0    | 0    | n.d. | n.d. | n.d. | 0    | 0    | n.d. | n.d. | 0    | 0    | n.d. | n.d. |      | 0    | 0    | 0    | 0    | 0    | 0    | 0    | 0    | 0    | 0    | 0    | 1    | 0    |    |
| FA3/FA2B     | 0   | 0    | 45   | 37   | 0    | 0    |      |      |      | 1    | 0    |      |      | 0    | 0    |      |      |      | 0    | 0    | 0    | 42   | 0    | 0    | 0    | 0    | 52   | 18   | 49   | 10   | 0    |    |
| A4/A3B       | 0   | 0    | 0    | 0    | 0    | 0    |      |      |      | 0    | 0    |      |      | 0    | 0    |      |      |      | 0    | 0    | 0    | 0    | 0    | 0    | 0    | 0    | 0    | 0    | 0    | 0    | 0    |    |
| FA4/FA3B     | 0   | 0    | 0    | 30   | 0    | 0    |      |      |      | 0    | 0    |      |      | 0    | 0    |      |      |      | 0    | 0    | 0    | 7    | 0    | 0    | 0    | 0    | 8    | 0    | 0    | 0    | 0    |    |
| Unoccupied   | 0   | 0    | 0    | 0    | 0    | 0    | 0    | 0    | 0    | 1    | 0    | 0    | 0    | 0    | 0    | 0    | 0    | 0    | 0    | 0    | 0    | 3    | 0    | 0    | 0    | 0    | 0    | 0    | 0    | 0    | 0    |    |
| UFO.664      |     |      |      |      |      |      |      |      |      |      |      |      |      |      |      |      |      |      |      |      |      |      |      |      |      |      |      |      |      |      |      |    |
| High mannose | 88  | 100  | 23   | 0    | 100  | 100  | 100  | n.d. | n.d. | 99   | 100  | 100  | 100  | 100  | 100  | n.d. | 100  | 100  | 100  | 100  | 11   | 100  | 0    | 100  | 100  | 100  | 4    | 24   | 0    | 0    | 84   |    |
| M9           | 0   | 70   | 0    | 0    | 0    | 100  | 60   |      |      | 58   | 83   | 70   | 59   | 89   | 20   |      |      |      | 100  | 71   | 94   | 42   | 0    | 28   | 0    | 100  | 78   | 75   | 0    | 0    | 0    |    |
| M8           | 8   | 22   | 0    | 0    | 0    | 35   |      |      |      | 33   | 17   | 30   | 41   | 10   | 73   |      |      |      | 0    | 29   | 5    | 46   | 0    | 44   | 0    | 19   | 22   | 0    | 0    | 0    | 4    |    |
| M7           | 12  | 4    | 0    | 0    | 25   | 0    | 5    |      |      | 4    | 0    | 0    | 0    | 1    | 6    |      |      |      | 0    | 0    | 1    | 10   | 0    | 29   | 0    | 2    | 3    | 0    | 0    | 38   |      |    |
| M6           | 21  | 1    | 0    | 0    | 0    | 0    |      |      |      | 2    | 0    | 0    | 0    | 0    | 1    |      |      |      | 0    | 0    | 2    | 0    | 0    | 0    | 0    | 1    | 0    | 0    | 0    | 17   |      |    |
| M5           | 31  | 2    | 23   | 0    | 75   | 0    | 0    |      |      | 2    | 0    | 0    | 0    | 0    | 0    |      |      |      | 0    | 0    | 0    | 8    | 0    | 0    | 0    | 0    | 3    | 20   | 0    | 16   |      |    |
| M4           | 7   | 0    | 0    | 0    | 0    | 0    |      |      |      | 0    | 0    | 0    | 0    | 0    | 0    |      |      |      | 0    | 0    | 0    | 0    | 0    | 0    | 0    | 0    | 0    | 0    | 0    | 1    |      |    |
| M3           | 1   | 0    | 0    | 0    | 0    | 0    |      |      |      | 0    | 0    | 0    | 0    | 0    | 0    |      |      |      | 0    | 0    | 0    | 0    | 0    | 0    | 0    | 0    | 0    | 0    | 0    | 0    |      |    |
| Hybrid       | 7   | 0    | 0    | 0    | 0    | 0    |      |      |      | 0    | 0    | 0    | 0    | 0    | 0    |      |      |      | 0    | 0    | 0    | 0    | 0    | 0    | 0    | 0    | 0    | 2    | 0    | 4    |      |    |
| Fhybrid      | 1   | 0    | 0    | 0    | 0    | 0    |      |      |      | 0    | 0    | 0    | 0    | 0    | 0    |      |      |      | 0    | 0    | 0    | 1    | 0    | 0    | 0    | 0    | 0    | 1    | 0    | 3    |      |    |
| A1           | 5   | 0    | 0    | 0    | 0    | 0    |      |      |      | 0    | 0    | 0    | 0    | 0    | 0    |      |      |      | 0    | 0    | 0    | 1    | 0    | 0    | 0    | 0    | 2    | 2    | 0    | 1    |      |    |
| FA1          | 0   | 0    | 12   | 0    | 0    | 0    |      |      |      | 0    | 0    | 0    | 0    | 0    | 0    |      |      |      | 0    | 0    | 0    | 6    | 0    | 0    | 0    | 0    | 5    | 6    | 1    | 0    | 5    |    |
| A2/A1B       | 5   | 0    | 0    | 0    | 0    | 0    |      |      |      | 0    | 0    | 0    | 0    | 0    | 0    |      |      |      | 0    | 0    | 0    | 0    | 0    | 0    | 0    | 0    | 8    | 0    | 0    | 0    |      |    |
| FA2/FA1B     | 1   | 0    | 17   | 40   | 0    | 0    | n.d. | n.d. | n.d. | 0    | 0    | 0    | 0    | 0    | 0    | n.d. | n.d. |      | 0    | 0    | 0    | 19   | 0    | 41   | 0    | 0    | 26   | 11   | 34   | 9    | 8    |    |
| A3/A2B       | 1   | 0    | 0    | 0    | 0    | 0    |      |      |      |      |      |      |      |      |      |      |      |      |      |      |      |      |      |      |      |      |      |      |      |      |      |    |

Figure S9

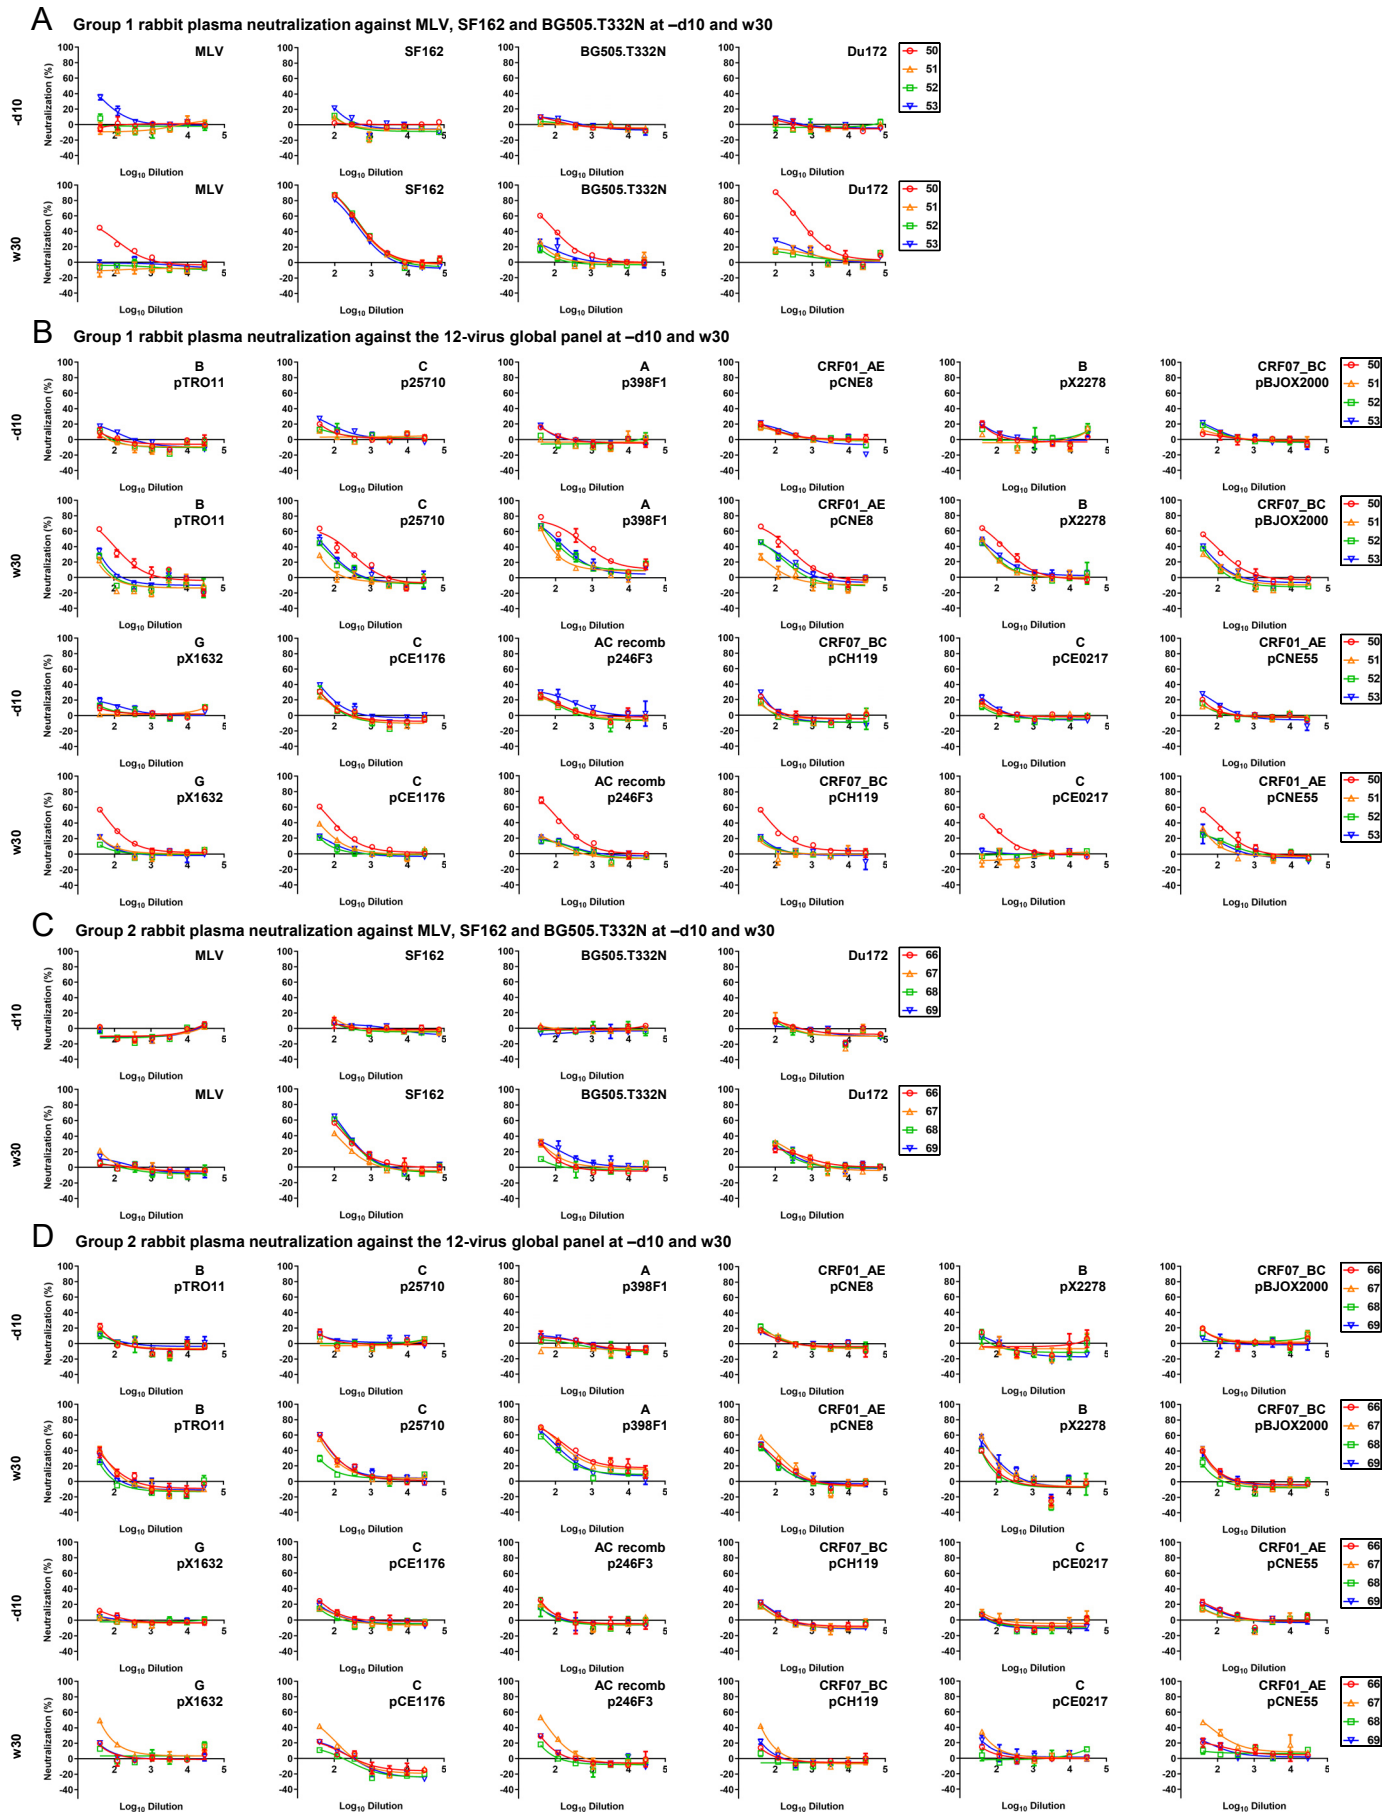

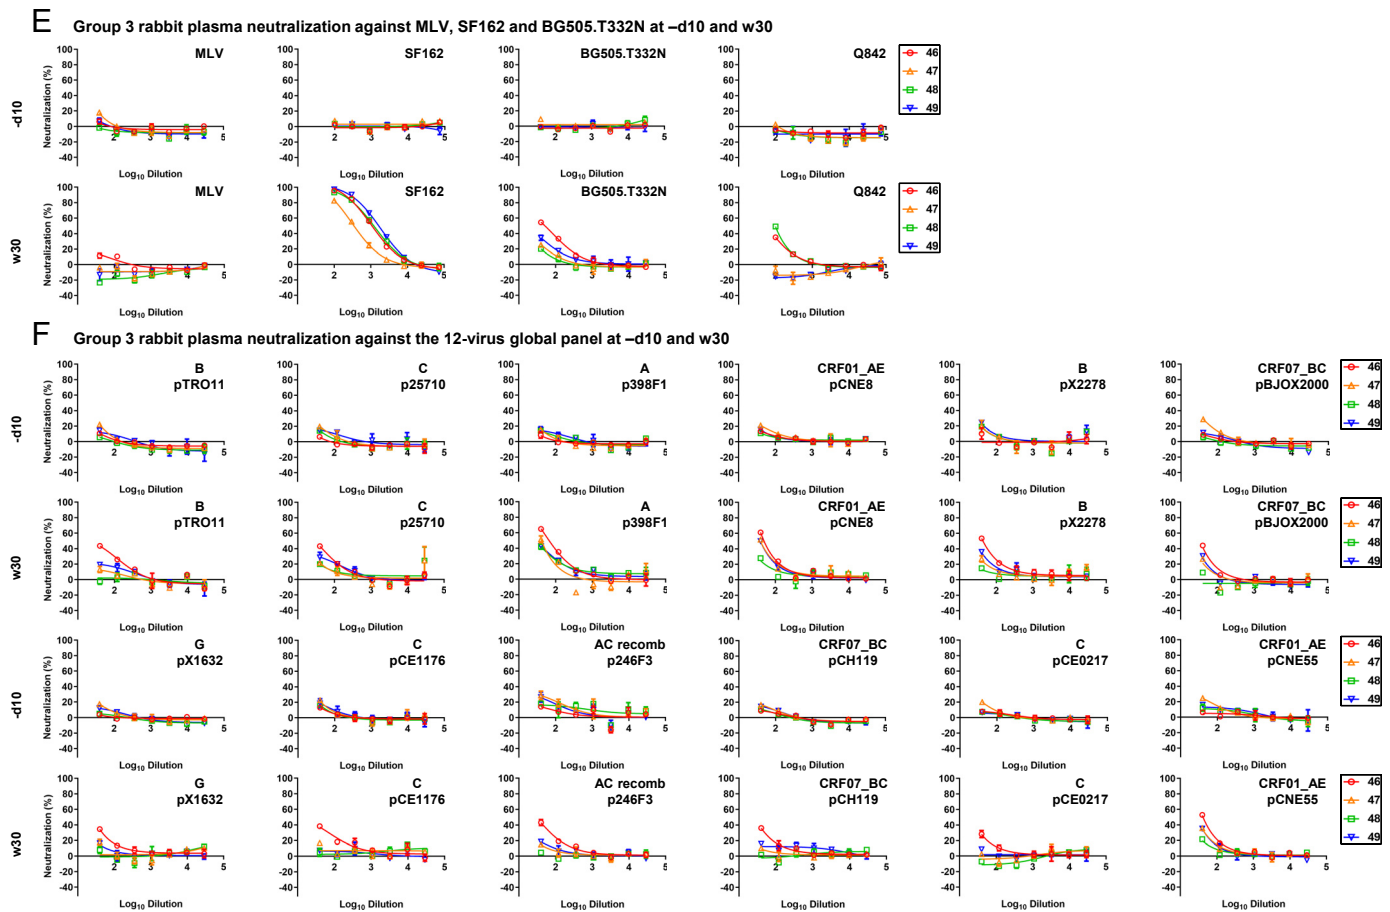

**fig. S9. Rabbit plasma neutralization from three non-BG505 Env-immunized rabbit groups.** Three groups of rabbits were immunized with Du172.17 UFO-BG trimer, gp140.664.R4-FR nanoparticle, and Q842-d12 UFO-BG trimer. (A) Neutralization of MLV, tier 1 clade B SF162, tier 2 clade A BG505.T332N, and tier 2 clade C Du172.17 by day -10 (-d10) and week 30 (w30) rabbit plasma from the Du172.17 trimer group. (B) Neutralization of all 12 isolates from a global panel by day -10 (-d10) and week 30 (w30) rabbit plasma from the Du172.17 trimer group. (C) Neutralization of MLV, SF162, BG505.T332N, and Du172.17 by day -10 (-d10) and week 30 (w30) rabbit plasma from the Du172.17 ferritin nanoparticle group. (D) Neutralization of all 12 isolates from a global panel by day -10 (-d10) and week 30 (w30) rabbit plasma from the Du172.17 ferritin nanoparticle group. (E) Neutralization of MLV, SF162, BG505.T332N, and tier 2 clade A Q842-d12 by day -10 (-d10) and week 30 (w30) rabbit plasma from the Q842-d12 trimer group. (F) Neutralization of all 12 isolates from a global panel by day -10 (-d10) and week 30 (w30) rabbit plasma from the Q842-d12 trimer group. The heat-inactivated plasma was diluted 100-fold for autologous virus and tier 1 SF162 and subjected to a 3-fold dilution series in the TZM-bl assay. To increase the sensitivity of detection, heat-inactivated plasma was diluted 40-fold for MLV and all other heterologous tier 2 isolates and followed by a 3-fold dilution series in the TZM-bl assay. ID<sub>50</sub> titers for plots (A) – (F) are summarized in Fig. 4D.

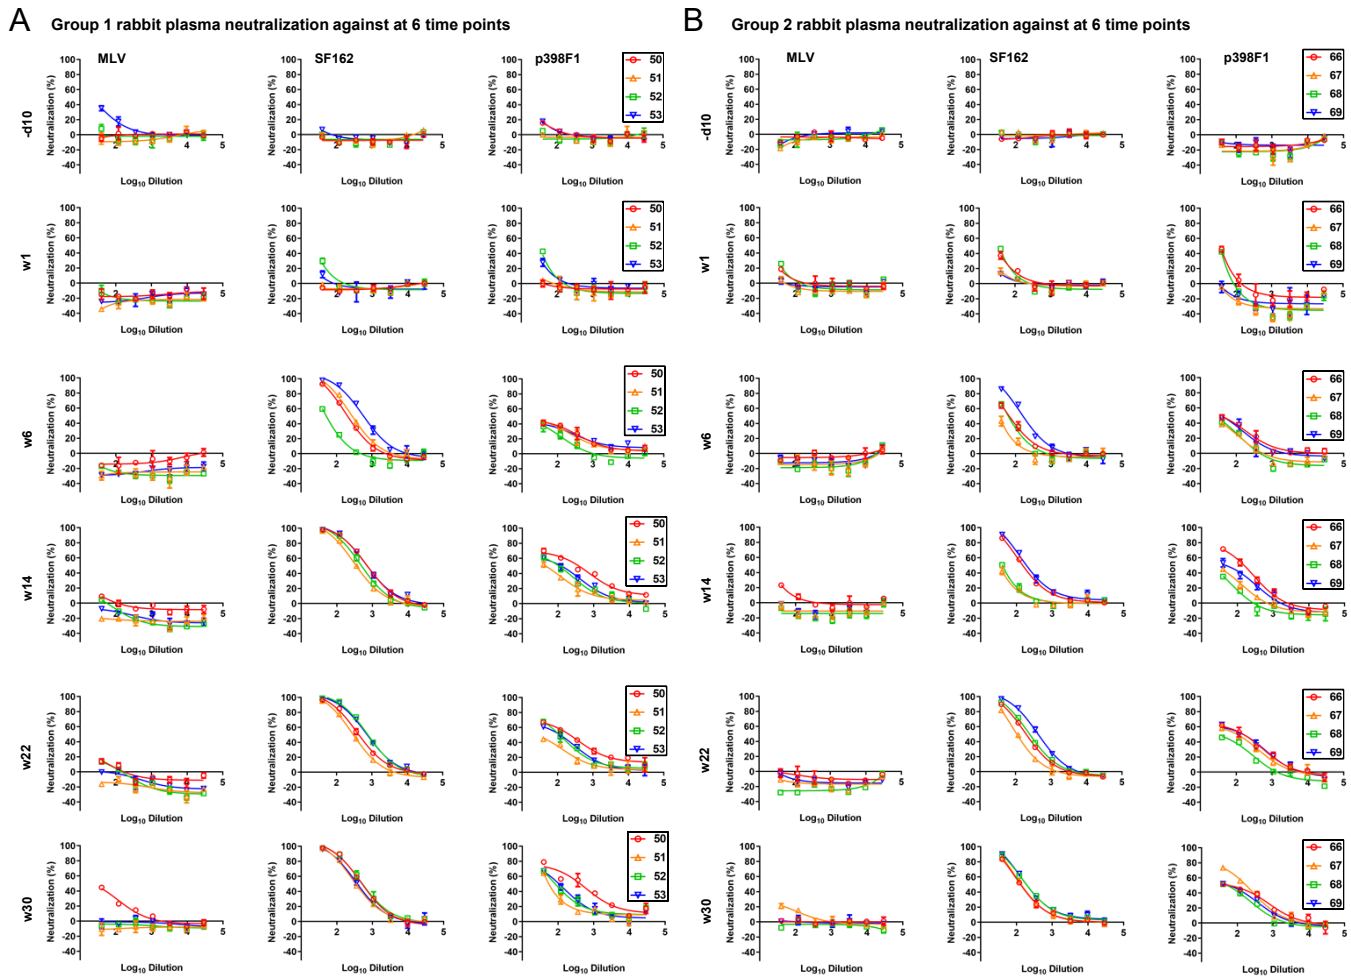

**fig. S10. Longitudinal rabbit plasma neutralization from two clade C Du172.17 Env-immunized rabbit groups.** Two rabbit groups immunized with Du172.17 UFO-BG trimer and gp140.664.R4-FR nanoparticle were analyzed. **(A)** Neutralization of MLV, tier 1 clade B SF162, and tier 2 clade A p398F1 by day -10 (-d10) and weeks 1, 6, 14, 22, and 30 rabbit plasma from the Du172.17 trimer group. **(B)** Neutralization of MLV, tier 1 clade B SF162, and tier 2 clade A p398F1 by day -10 (-d10) and weeks 1, 6, 14, 22, and 30 rabbit plasma from the Du172.17 gp140.664.R4-FR nanoparticle group. In this analysis, the heat-inactivated plasma was diluted 40-fold for both SF162 and p398F1 and then subjected to a 3-fold dilution series in the TZM-bl assay. ID<sub>50</sub> titers for plots (A) – (B) are shown in Fig. 4E.

**Table S1. X-ray crystallographic data collection and refinement statistics.**

| <b>Data collection</b>                             | BG505 gp120 core, Fabs M4H2K1, 17b                                                    | Fab M4H2K1                              | Du172.17 gp140.664.R4, Fabs PGT124, 35O22 |
|----------------------------------------------------|---------------------------------------------------------------------------------------|-----------------------------------------|-------------------------------------------|
| X-ray Source                                       | APS 23ID-B                                                                            | APS 23ID-D                              | APS 23ID-D                                |
| Wavelength (Å)                                     | 1.033                                                                                 | 1.033                                   | 1.033                                     |
| Detector                                           | Eiger                                                                                 | Pilatus                                 | Pilatus                                   |
| Space group                                        | P2 <sub>1</sub> 2 <sub>1</sub> 2                                                      | P3 <sub>1</sub> 21                      | P6 <sub>3</sub>                           |
| Unit cell parameters                               | a = 204.0, b = 60.6, c = 166.7 Å                                                      | a = b = 68.3, c = 184.7 Å               | a = b = 127.0, c = 316.5 Å                |
| Resolution (Å)                                     | 50.00 – 4.30 (4.73 – 4.63) (4.63 – 4.54)<br>(4.54 – 4.45) (4.45 – 4.37) (4.37 – 4.30) | 50.00 – 1.50 (1.53 – 1.50) <sup>a</sup> | 50.00 – 3.40 (3.46 – 3.40) <sup>a</sup>   |
| Observations                                       | 109,015                                                                               | 929,037                                 | 248,831                                   |
| Unique reflections                                 | 12,843 (280) <sup>a</sup>                                                             | 81,206 (3,998) <sup>a</sup>             | 38,788 (1614) <sup>a</sup>                |
| Redundancy                                         | 8.5 (1.8) <sup>a</sup>                                                                | 11.4 (11.1) <sup>a</sup>                | 6.4 (3.7) <sup>a</sup>                    |
| Completeness (%)                                   | 86.8 (80.4) (67.2) (61.8) (52.6) (45.6) (39.4)                                        | 99.8 (99.5) <sup>a</sup>                | 97.6 (81.1)                               |
| $\langle I/\sigma \rangle^b$                       | 13.0 (1.0) <sup>a</sup>                                                               | 34.9 (2.0) <sup>a</sup>                 | 8.6 (1.0) <sup>a</sup>                    |
| $R_{\text{sym}}^c$                                 | 0.21 (0.83) <sup>a</sup>                                                              | 0.08 (0.99) <sup>a</sup>                | 0.21 (1.00) <sup>a</sup>                  |
| $R_{\text{pim}}^c$                                 | 0.06 (0.50) <sup>a</sup>                                                              | 0.02 (0.29) <sup>a</sup>                | 0.08 (0.48) <sup>a</sup>                  |
| CC <sub>1/2</sub>                                  | 0.86 (0.39) <sup>a</sup>                                                              | 0.94 (0.73) <sup>a</sup>                | 0.85 (0.45) <sup>a</sup>                  |
| <b>Refinement statistics</b>                       |                                                                                       |                                         |                                           |
| Resolution (Å)                                     | 43.04 – 4.30                                                                          | 49.88 – 1.50                            | 49.53 – 3.40                              |
| Reflections (work)                                 | 12,392                                                                                | 81,150                                  | 38,200                                    |
| $R_{\text{cryst}} (\%)^d / R_{\text{free}} (\%)^e$ | 30.1 / 33.3                                                                           | 18.3 / 21.6                             | 30.3 / 32.6                               |
| No. atoms                                          |                                                                                       |                                         |                                           |
| Protein / Ligands                                  | 9429                                                                                  | 3347 / 17                               | 11322                                     |
| Glycan                                             | 282                                                                                   | -                                       | 726                                       |
| Water                                              | -                                                                                     | 624                                     | -                                         |
| Average $B$ -value (Å <sup>2</sup> )               |                                                                                       |                                         |                                           |
| Protein                                            | 172                                                                                   | 24                                      | 108                                       |
| Glycan                                             | 89                                                                                    | -                                       | 147                                       |
| Water                                              | -                                                                                     | 36                                      | -                                         |
| Wilson $B$ -value (Å <sup>2</sup> )                | 139                                                                                   | 18                                      | 93                                        |
| RMSD from ideal geometry                           |                                                                                       |                                         |                                           |
| Bond length (Å)                                    | 0.004                                                                                 | 0.009                                   | 0.002                                     |
| Bond angles (°)                                    | 0.85                                                                                  | 1.16                                    | 0.50                                      |
| Ramachandran statistics (%) <sup>f</sup>           |                                                                                       |                                         |                                           |
| Favored                                            | 95.05                                                                                 | 97.71                                   | 90.58                                     |
| Allowed                                            | 4.37                                                                                  | 2.29                                    | 8.46                                      |
| Outliers                                           | 0.58                                                                                  | 0                                       | 0.96                                      |
| PDB ID                                             | 7KLC                                                                                  | 7KKZ                                    | 7KMD                                      |

<sup>a</sup> Numbers in parentheses refer to the highest resolution shell.

---

<sup>b</sup> Calculated as  $\text{average}(I)/\text{average}(\sigma I)$

<sup>c</sup>  $R_{\text{sym}} = \sum_{hkl} \sum_i |I_{hkl,i} - \langle I_{hkl} \rangle| / \sum_{hkl} \sum_i I_{hkl,i}$ , where  $I_{hkl,i}$  is the scaled intensity of the  $i^{\text{th}}$  measurement of reflection h, k, l,  $\langle I_{hkl} \rangle$  is the average intensity for that reflection, and  $n$  is the redundancy.  $R_{\text{pim}}$  is a redundancy-independent measure of the quality of intensity measurements.  $R_{\text{pim}} = \sum_{hkl} (1/(n-1))^{1/2} \sum_i |I_{hkl,i} - \langle I_{hkl} \rangle| / \sum_{hkl} \sum_i I_{hkl,i}$ , where  $I_{hkl,i}$  is the scaled intensity of the  $i^{\text{th}}$  measurement of reflection h, k, l,  $\langle I_{hkl} \rangle$  is the average intensity for that reflection, and  $n$  is the redundancy.

<sup>d</sup>  $R_{\text{cryst}} = \sum_{hkl} |F_o - F_c| / \sum_{hkl} |F_o| \times 100$

<sup>e</sup>  $R_{\text{free}}$  was calculated as for  $R_{\text{cryst}}$ , but on a test set comprising 5% of the data excluded from refinement.

<sup>f</sup> These values were calculated using MolProbity (<http://molprobity.biochem.duke.edu>).



**A**
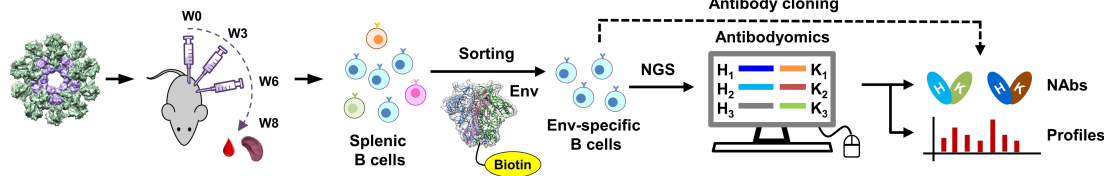
**B**
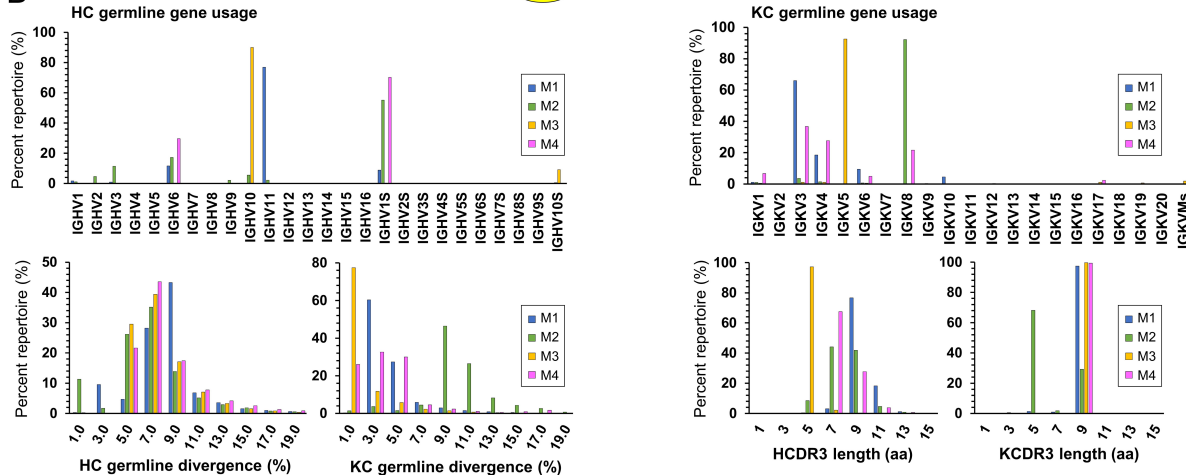
**C**
**Antibodies identified from gp140 nanoparticle-immunized mice by NGS and heavy/light pairing and by single-cell sorting <sup>a</sup>**

| Chain                | V <sub>H</sub> family | V <sub>H</sub> identity (%) | %Repertoire | HCDCR1       | HCDCR2     | HCDCR3       |
|----------------------|-----------------------|-----------------------------|-------------|--------------|------------|--------------|
| M1H1 <sup>b</sup>    | IGHV11-2*02           | 93.2                        | 61.5        | GFSESGFW     | INSDGTSI   | MRGFYLLGPRLT |
| M1H2                 | IGHV6-6*02            | 97.7                        | 9.2         | GFTISNYW     | IRLKANNAT  | TRPGYGYAMDQ  |
| M1H3                 | IGHV1S53*02           | 95.5                        | 2.6         | GYTFTDRA     | IVPGNSDI   | NCYDYDDGY    |
| M4H1                 | IGHV1S28*01           | 93.2                        | 58.3        | GYTFTNYW     | VYPGDGFT   | STPTVVPDY    |
| M4H2                 | IGHV6-6*02            | 96.0                        | 23.1        | GITFSNSW     | IRLKAQNYAT | TTPLGGFYFMDY |
| M4-Ab3H <sup>c</sup> | IGHV6-6*02            | 94.2                        | -           | GFTFSNSW     | IRLKVHNYAT | TTPLGGFYFMDY |
| M4-Ab9H <sup>c</sup> | IGHV6-6*02            | 95.9                        | -           | GITFSNSW     | IRLKVNNYAT | TTPLGGYAVDY  |
| Chain                | V <sub>K</sub> family | V <sub>K</sub> identity (%) | %Repertoire | KDCR1        | KDCR2      | KDCR3        |
| M1K1                 | IGKV3-2*01            | 98.3                        | 55.0        | ESVDNYGISF   | GAS        | QQSKEVPYT    |
| M1K2                 | IGKV6-25*01           | 96.8                        | 6.6         | QDVSTA       | WTS        | QQHYSTPWT    |
| M1K3                 | IGKV4-55*01           | 96.8                        | 2.9         | SSVS         | DTS        | QQWSRYPFT    |
| M4K1                 | IGKV3-2*01            | 99.0                        | 29.6        | ESVDIYGISF   | AAS        | QQSKEVPWT    |
| M4K2                 | IGKV4-55*01           | 95.8                        | 22.5        | SSVS         | DTS        | QQWDYFPLT    |
| M4K3                 | IGKV8-30*01           | 100.0                       | 19.0        | QSLLYSSNQKNY | WAS        | QQYYSYPLT    |
| M4-Ab3K <sup>c</sup> | IGKV3-2*01            | 97.0                        | -           | ESVDNYGVSF   | AAS        | QQKELPWT     |
| M4-Ab9K <sup>c</sup> | IGKV3-2*01            | 97.9                        | -           | ETVDNYGISF   | AAS        | QQSKEVPWT    |

<sup>a</sup> Mice 1-4 were immunized with an I3-01 nanoparticle presenting 20 gp141-stabilized BG505 trimers, with mice 1 and 4 showing robust neutralization of a tier-2 autologous isolate, BG505.T332N. <sup>b</sup> M1H1 sequence does not have the "WGXG" motif and the typical "VSS" C-terminal motif, but is included for the sake of completeness in the NGS analysis. <sup>c</sup> M4-Ab3 and Ab9 were isolated from mouse 4 by antigen-specific single-cell sorting using a BG505 trimer bait.

**D**
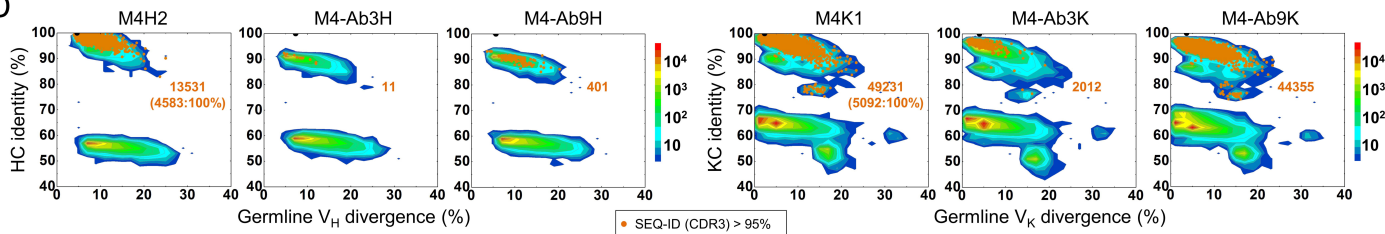
**E**
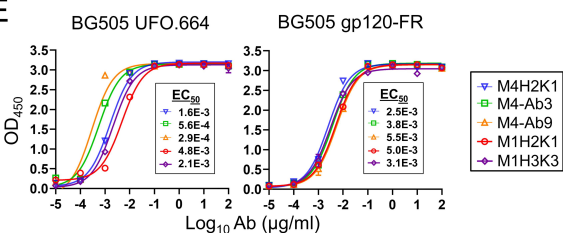
**F**
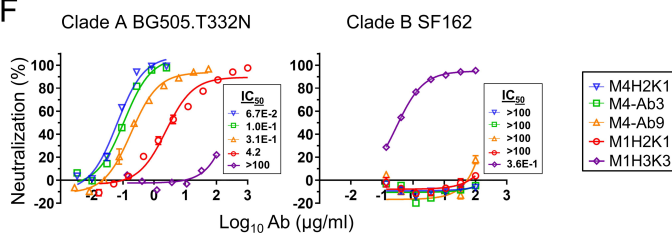

# Figure 2

**A**

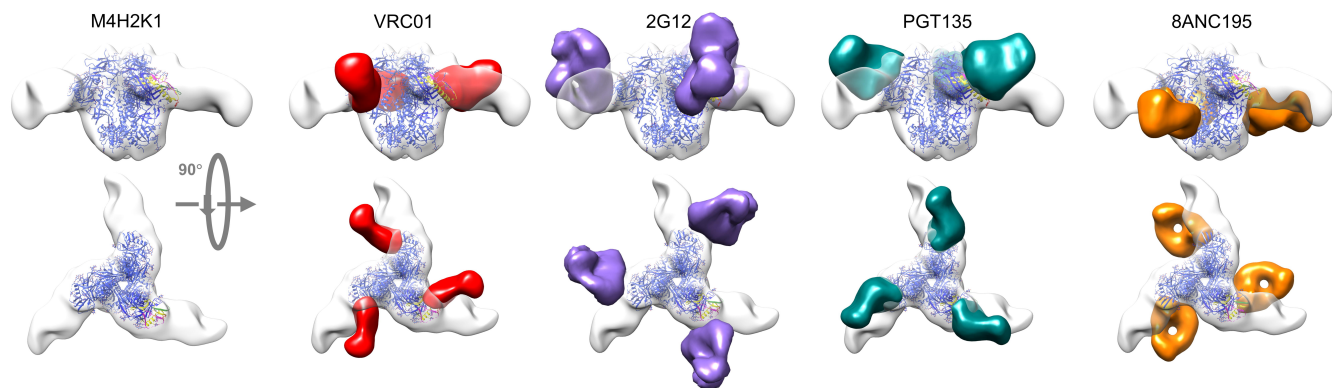

**B**

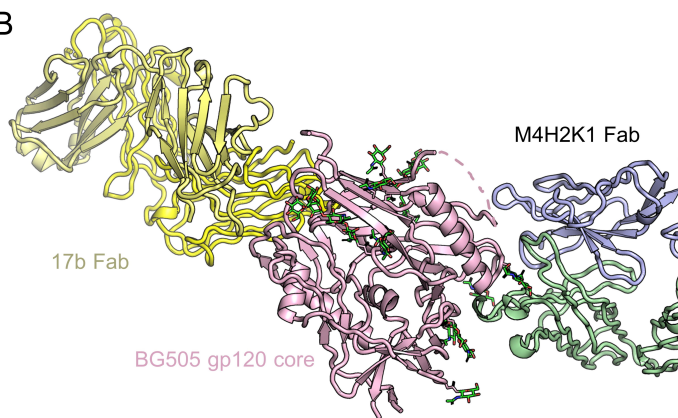

**C**

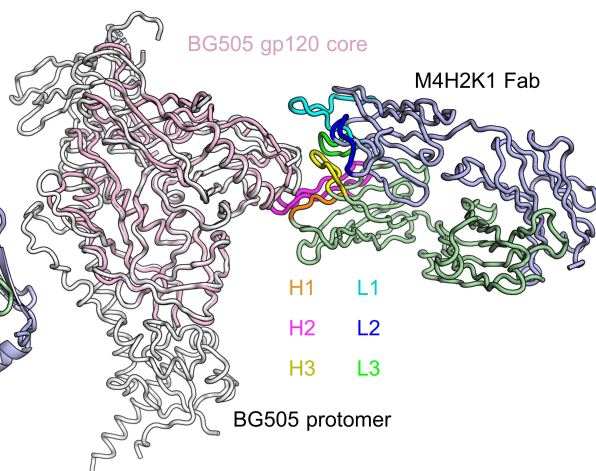

**D**

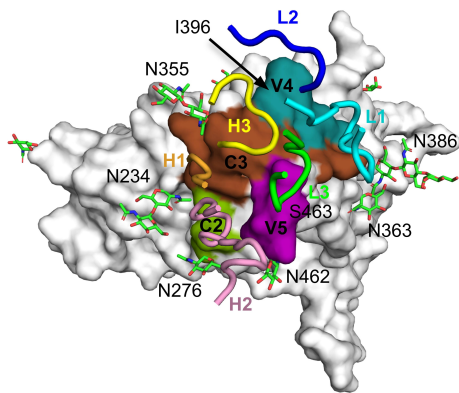

**E**

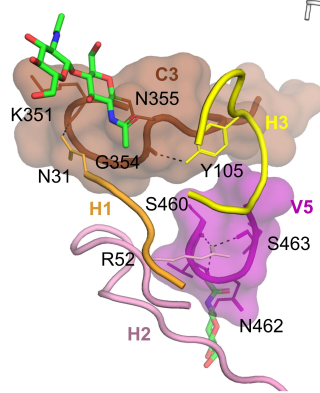

| BG505  | M4H2K1 HC | HB (Å) |
|--------|-----------|--------|
| K351:O | N31:ND2   | 2.9    |
| S463:O | R52:NH1   | 2.4    |
| S460:O | R52:NH1   | 2.2    |
| T461:O | R52:NH1   | 2.6    |
| N462:O | R52:NH2   | 3.7    |
| G354:O | Y105:OH   | 2.9    |

**F**

BG505.T332N mutant viruses

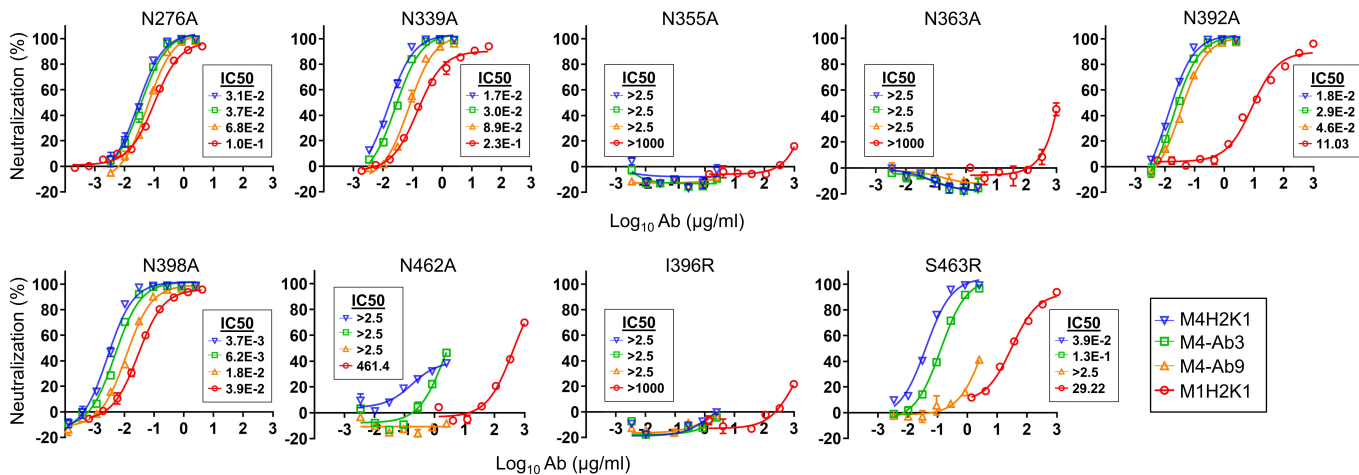

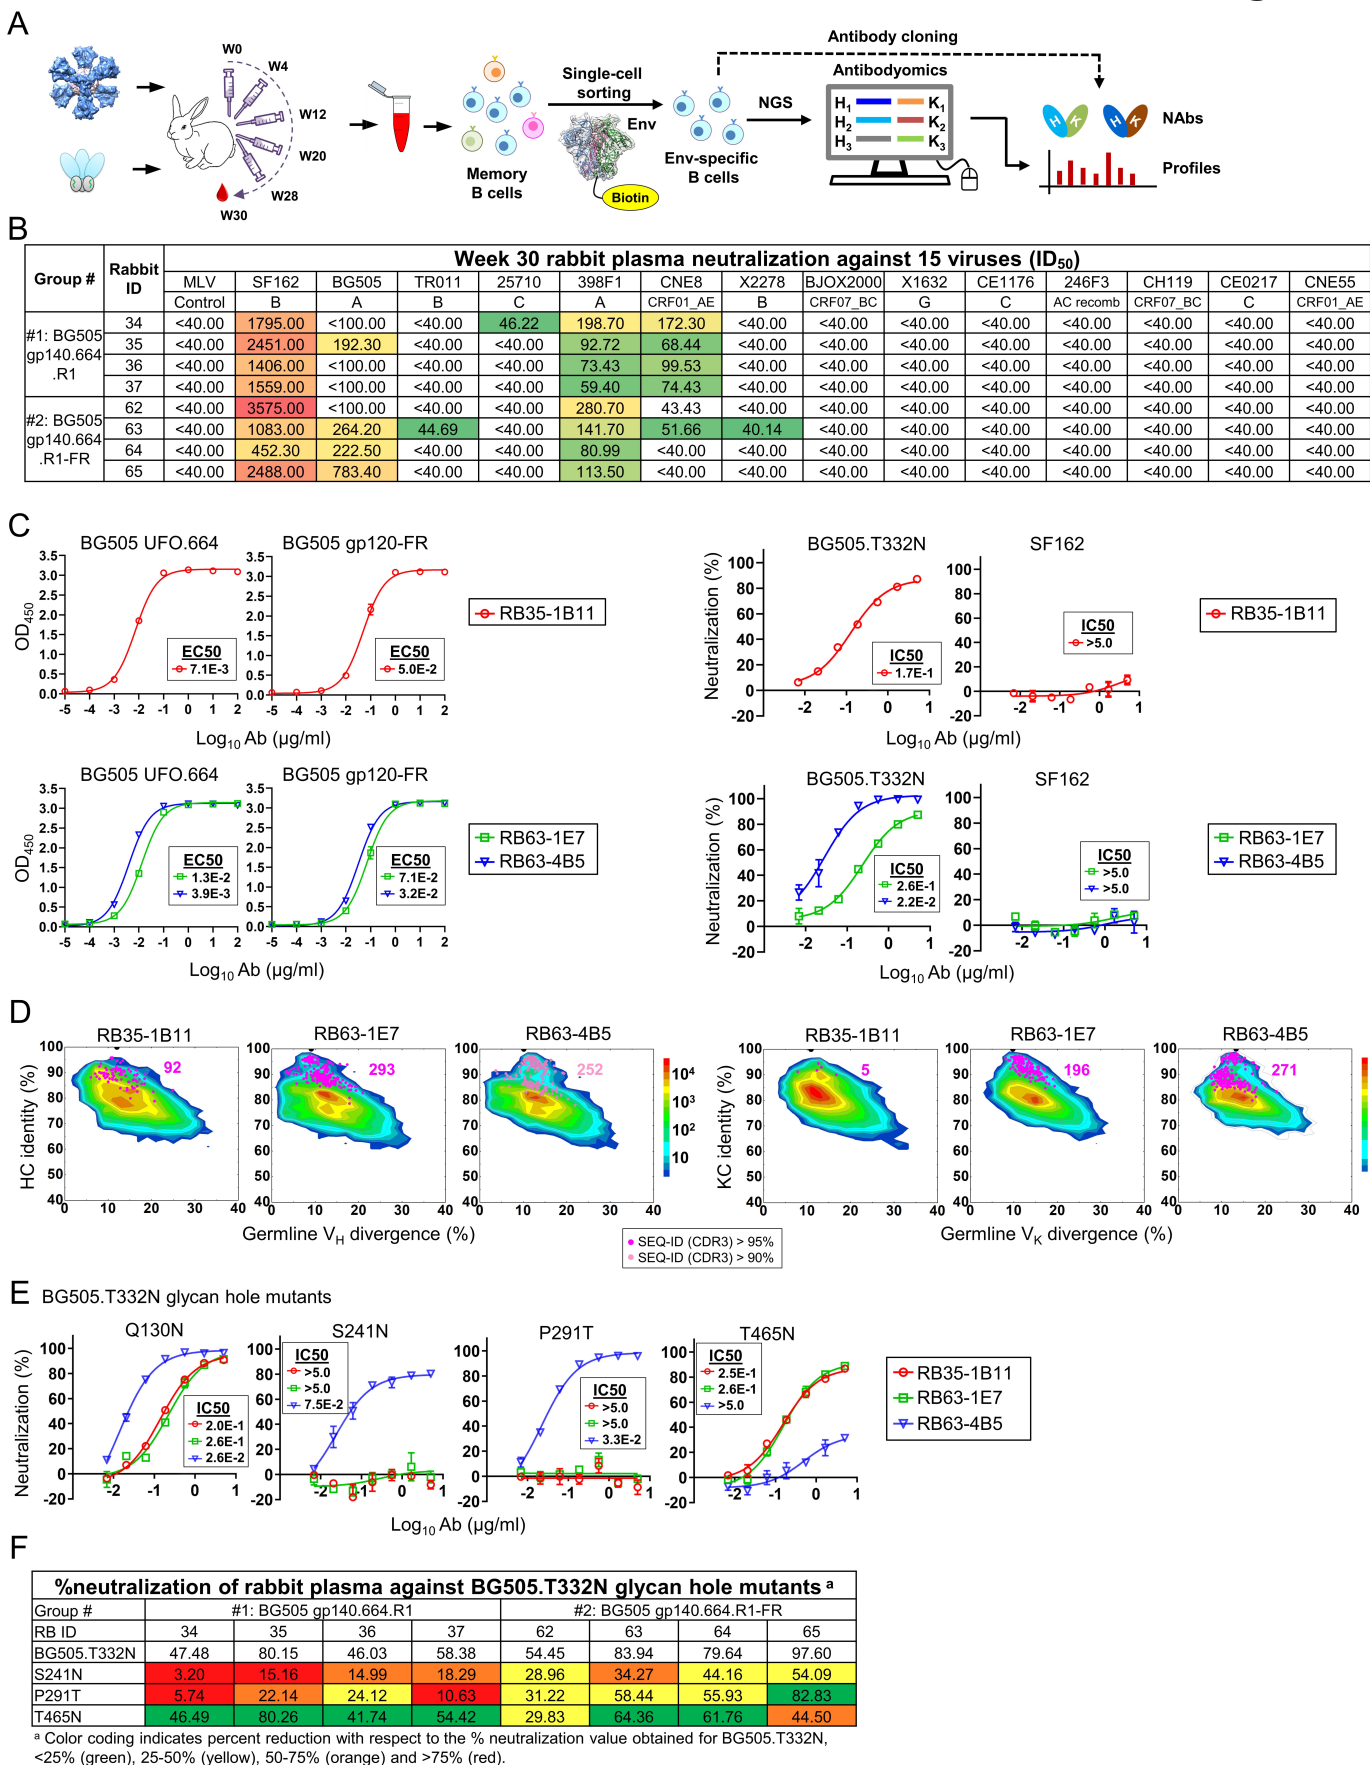



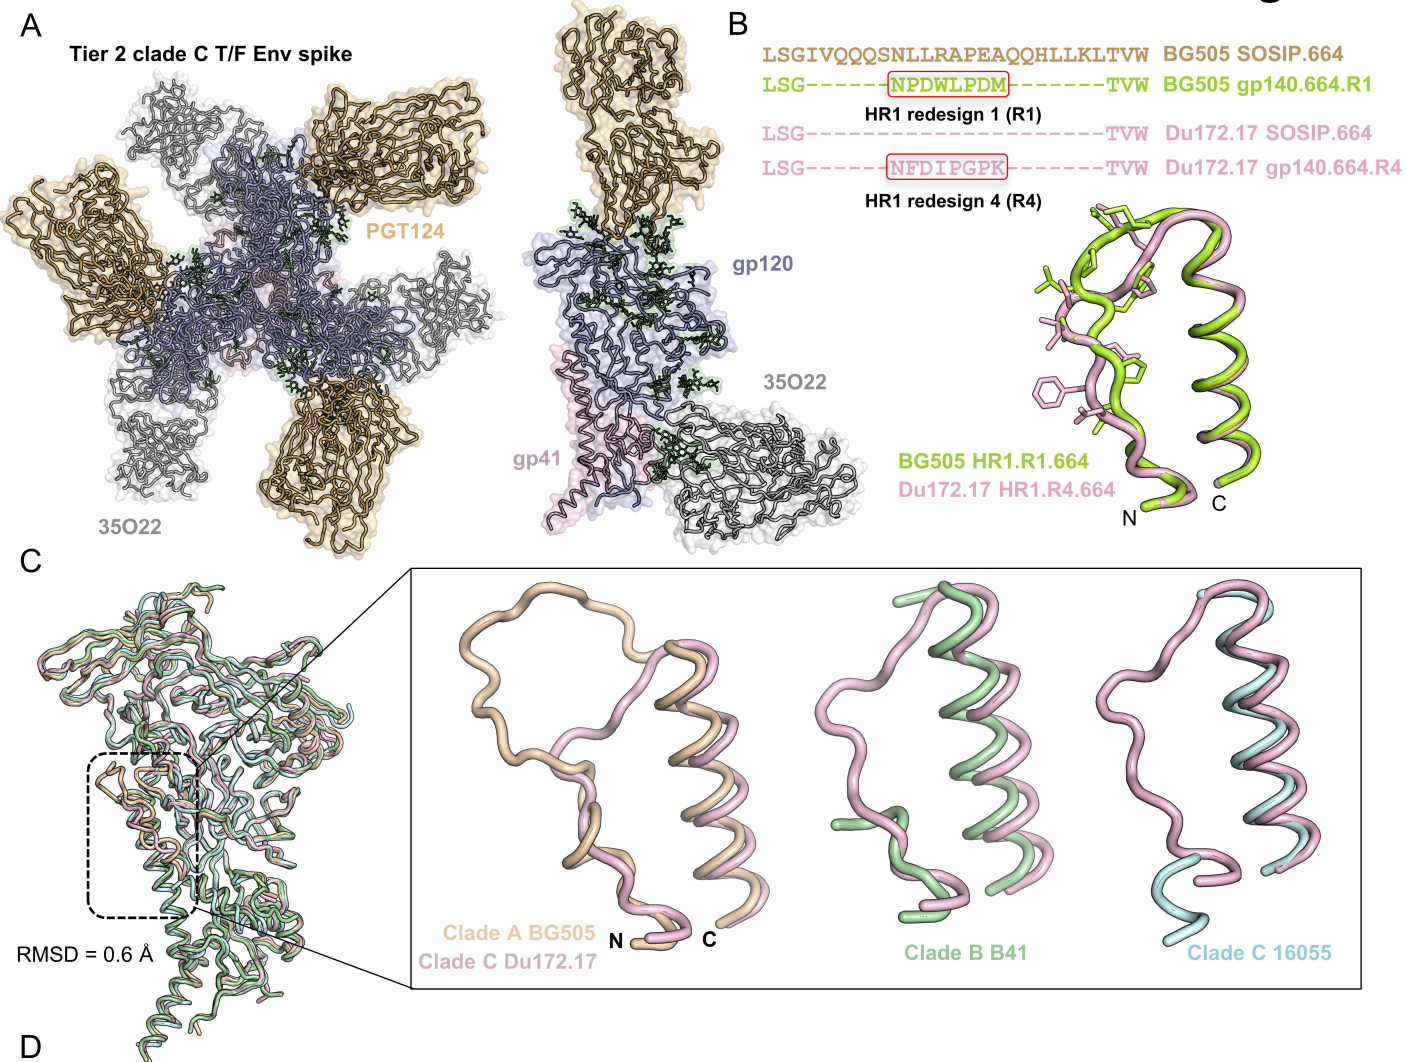

**D**

Week 30 rabbit plasma neutralization against 16 viruses (ID<sub>50</sub>)

| Group # | Rabbit ID     | Week 30 rabbit plasma neutralization against 16 viruses (ID <sub>50</sub> ) |         |         |         |         |         |        |        |        |        |           |        |        |        |        |        |        |
|---------|---------------|-----------------------------------------------------------------------------|---------|---------|---------|---------|---------|--------|--------|--------|--------|-----------|--------|--------|--------|--------|--------|--------|
|         |               | MLV                                                                         | SF162   | BG505   | Q842    | Du172   | TRO11   | 25710  | 398F1  | CNE8   | X2278  | BJOX 2000 | X1632  | CE1176 | 246F3  | CH119  | CE0217 | CNE55  |
| #1:     | 50            | <40.00                                                                      | 475.60  | 68.36   | N/a     | 595.40  | 64.55   | 88.49  | 381.00 | 110.30 | 86.46  | 54.68     | 52.65  | 64.67  | 92.05  | 54.48  | 40.84  | 58.63  |
|         | Du172.17      | 51                                                                          | <40.00  | 454.80  | <40.00  | N/a     | <100.00 | <40.00 | 62.83  | <40.00 | <40.00 | <40.00    | <40.00 | <40.00 | <40.00 | <40.00 | <40.00 | <40.00 |
|         | UFO-BG trimer | 52                                                                          | <40.00  | 471.90  | <40.00  | N/a     | <100.00 | <40.00 | 95.00  | <40.00 | <40.00 | <40.00    | <40.00 | <40.00 | <40.00 | <40.00 | <40.00 | <40.00 |
|         | 53            | <40.00                                                                      | 349.80  | <40.00  | N/a     | <100.00 | <40.00  | 109.30 | <40.00 | 40.34  | <40.00 | <40.00    | <40.00 | <40.00 | <40.00 | <40.00 | <40.00 | <40.00 |
| #2:     | 66            | <40.00                                                                      | 132.70  | <40.00  | N/a     | <100.00 | <40.00  | 56.13  | 181.20 | <40.00 | <40.00 | <40.00    | <40.00 | <40.00 | <40.00 | <40.00 | <40.00 | <40.00 |
|         | Du172.17      | 67                                                                          | <40.00  | <100.00 | <40.00  | N/a     | <100.00 | <40.00 | 46.14  | 151.10 | 55.20  | 43.55     | <40.00 | <40.00 | 40.04  | <40.00 | <40.00 | 46.97  |
|         | gp140.664.R   | 68                                                                          | <40.00  | 142.00  | <40.00  | N/a     | <100.00 | <40.00 | 71.93  | <40.00 | <40.00 | <40.00    | <40.00 | <40.00 | <40.00 | <40.00 | <40.00 | <40.00 |
|         | 4-FR          | 69                                                                          | <40.00  | 161.80  | <40.00  | N/a     | <100.00 | <40.00 | 57.01  | 95.81  | <40.00 | 40.23     | <40.00 | <40.00 | <40.00 | <40.00 | <40.00 | <40.00 |
| #3:     | 46            | <40.00                                                                      | 1074.00 | 52.05   | <100.00 | N/a     | <40.00  | <40.00 | 65.48  | 48.11  | 43.04  | <40.00    | <40.00 | <40.00 | <40.00 | <40.00 | <40.00 | <40.00 |
|         | Q842-d12      | 47                                                                          | <40.00  | 344.40  | <40.00  | <100.00 | N/a     | <40.00 | <40.00 | <40.00 | <40.00 | <40.00    | <40.00 | <40.00 | <40.00 | <40.00 | <40.00 | <40.00 |
|         | UFO-BG trimer | 48                                                                          | <40.00  | 1156.00 | <40.00  | <100.00 | N/a     | <40.00 | <40.00 | <40.00 | <40.00 | <40.00    | <40.00 | <40.00 | <40.00 | <40.00 | <40.00 | <40.00 |
|         | 49            | <40.00                                                                      | 1554.00 | <40.00  | <100.00 | N/a     | <40.00  | <40.00 | <40.00 | <40.00 | <40.00 | <40.00    | <40.00 | <40.00 | <40.00 | <40.00 | <40.00 | <40.00 |

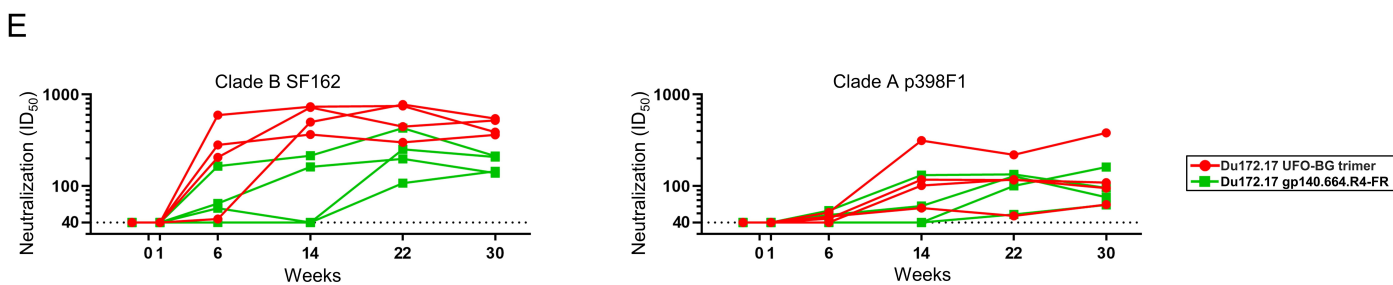

Source: https://www.biorxiv.org/content/biorxiv/early/2020/12/02/2020.12.02.408328.full.pdf
